# Supplementary material
Source: PubMed Central journal article supplement (PMC2393758)
Supplement: pnas_0800668105_6.pdf [file pnas_0800668105_6.pdf]

**Table 1. Genes present in *H. pylori* HPAG1, 26695, or J99 but absent in Kx1 and Kx2.**

| <b>Locus</b> | <b>Annotation</b>                                               |
|--------------|-----------------------------------------------------------------|
| HPAG1_0049   | type II restriction enzyme [ <i>Helicobacter pylori</i> HPAG1]  |
| HPAG1_0050   | type II restriction enzyme                                      |
| HPAG1_0218   | beta-1,4-N-acetylgalactosamyltransferase                        |
| HPAG1_0219   | beta-1,4-N-acetylgalactosamyltransferase                        |
| HPAG1_0227   | hypothetical protein HPAG1_0227                                 |
| HPAG1_0353   | hypothetical protein HPAG1_0353                                 |
| HPAG1_0458   | type II adenine specific DNA methyltransferase                  |
| HPAG1_0459   | type II restriction endonuclease                                |
| HPAG1_0624   | hypothetical protein HPAG1_0624                                 |
| HPAG1_0673   | putative type II restriction enzyme                             |
| HPAG1_0751   | hypothetical protein HPAG1_0751                                 |
| HPAG1_0929   | protein tRNA-associated locus protein                           |
| HPAG1_0967   | hypothetical protein HPAG1_0967                                 |
| HPAG1_1160   | hypothetical protein HPAG1_1160                                 |
| HPAG1_1161   | hypothetical protein HPAG1_1161                                 |
| HPAG1_1279   | hypothetical protein HPAG1_1279                                 |
| HPAG1_1280   | hypothetical protein HPAG1_1280                                 |
| HPAG1_1281   | hypothetical protein HPAG1_1281                                 |
| HPAG1_1333   | hypothetical protein HPAG1_1333                                 |
| HPAG1_1334   | hypothetical protein HPAG1_1334                                 |
| HPAG1_1359   | hypothetical protein HPAG1_1359                                 |
| HPAG1_1396   | hypothetical protein HPAG1_1396                                 |
| HPAG1_1413   | type II adenine specific DNA methyltransferase                  |
| HPAG1_1441   | restriction enzyme BcgI alpha chain-like protein                |
| HPAG1_1442   | restriction enzyme BcgI alpha chain-like protein                |
| HPAG1_1443   | restriction enzyme BcgI alpha chain-like protein                |
| HPAG1_1463   | hypothetical protein HPAG1_1463                                 |
| HPAG1_1467   | hypothetical protein HPAG1_1467                                 |
| HPAG1_1480   | hypothetical protein HPAG1_1480                                 |
| HPAG1_p001   | replication initiation protein A                                |
| HPAG1_p003   | replication initiation protein A                                |
| HP0008       | hypothetical protein HP0008 [ <i>Helicobacter pylori</i> 26695] |
| HP0052       | hypothetical protein HP0052 [ <i>Helicobacter pylori</i> 26695] |
| HP0091       | type II restriction enzyme R protein (hsdR)                     |
| HP0217       | hypothetical protein HP0217                                     |
| HP0225       | hypothetical protein HP0225                                     |
| HP0314       | hypothetical protein HP0314                                     |
| HP0315       | virulence associated protein D (vapD)                           |
| HP0339       | hypothetical protein HP0339                                     |
| HP0340       | hypothetical protein HP0340                                     |
| HP0342       | hypothetical protein HP0342                                     |
| HP0343       | hypothetical protein HP0343                                     |
| HP0344       | hypothetical protein HP0344                                     |
| HP0346       | hypothetical protein HP0346                                     |
| HP0425       | hypothetical protein HP0425                                     |
| HP0428       | phage/colicin/tellurite resistance cluster terY protein         |
| HP0429       | hypothetical protein HP0429                                     |
| HP0430       | hypothetical protein HP0430                                     |
| HP0431       | protein phosphatase 2C homolog (ptc1)                           |
| HP0432       | protein kinase C-like protein                                   |

|         |                                                |
|---------|------------------------------------------------|
| HP0433  | hypothetical protein HP0433                    |
| HP0434  | hypothetical protein HP0434                    |
| HP0445  | hypothetical protein HP0445                    |
| HP0448  | hypothetical protein HP0448                    |
| HP0449  | hypothetical protein HP0449                    |
| HP0450  | hypothetical protein HP0450                    |
| HP0451  | hypothetical protein HP0451                    |
| HP0453  | hypothetical protein HP0453                    |
| HP0455  | hypothetical protein HP0455                    |
| HP0456  | hypothetical protein HP0456                    |
| HP0458  | hypothetical protein HP0458                    |
| HP0460  | hypothetical protein HP0460                    |
| HP0461  | hypothetical protein HP0461                    |
| HP0481  | adenine specific DNA methyltransferase (MFOKI) |
| HP0484  | hypothetical protein HP0484                    |
| HP0670  | hypothetical protein HP0670                    |
| HP0704  | hypothetical protein HP0704                    |
| HP0765  | hypothetical protein HP0765                    |
| HP0767  | hypothetical protein HP0767                    |
| HP0855  | alginate O-acetylation protein (agl)           |
| HP0856  | hypothetical protein HP0856                    |
| HP0881  | hypothetical protein HP0881                    |
| HP0917  | hypothetical protein HP0917                    |
| HP0945  | hypothetical protein HP0945                    |
| HP0967  | virulence associated protein D (vapD)          |
| HP0982  | hypothetical protein HP0982                    |
| HP0984  | hypothetical protein HP0984                    |
| HP0985  | hypothetical protein HP0985                    |
| HP0986  | hypothetical protein HP0986                    |
| HP1094  | hypothetical protein HP1094                    |
| HP1283  | hypothetical protein HP1283                    |
| HP1366  | type IIS restriction enzyme R protein (MBOIIR) |
| HP1381  | hypothetical protein HP1381                    |
| HP1388  | hypothetical protein HP1388                    |
| HP1389  | hypothetical protein HP1389                    |
| HP1410  | hypothetical protein HP1410                    |
| HP1433  | hypothetical protein HP1433                    |
| HP1472  | type IIS restriction enzyme M protein (mod)    |
| HP1499  | hypothetical protein HP1499                    |
| HP1500  | hypothetical protein HP1500                    |
| HP1515  | hypothetical protein HP1515                    |
| HP1516  | hypothetical protein HP1516                    |
| HP1519  | hypothetical protein HP1519                    |
| HP1520  | hypothetical protein HP1520                    |
| HP1536  | hypothetical protein HP1536                    |
| JHP0046 | putative TYPE II restriction enzyme            |
| JHP0164 | putative restriction enzyme                    |
| JHP0165 | hypothetical protein JHP0165                   |
| JHP0203 | hypothetical protein JHP0203                   |
| JHP0436 | hypothetical protein JHP0436                   |
| JHP0755 | hypothetical protein JHP0755                   |
| JHP0829 | hypothetical protein JHP0829                   |
| JHP0925 | hypothetical protein JHP0925                   |

|         |                                                              |
|---------|--------------------------------------------------------------|
| JHP0930 | hypothetical protein JHP0930                                 |
| JHP0932 | hypothetical protein JHP0932                                 |
| JHP0933 | hypothetical protein JHP0933                                 |
| JHP0944 | hypothetical protein JHP0944                                 |
| JHP0948 | hypothetical protein JHP0948                                 |
| JHP1043 | hypothetical protein JHP1043                                 |
| JHP1049 | hypothetical protein JHP1049                                 |
| JHP1132 | hypothetical protein JHP1132                                 |
| JHP1160 | hypothetical protein JHP1160                                 |
| JHP1303 | hypothetical protein JHP1303                                 |
| JHP1326 | hypothetical protein JHP1326                                 |
| JHP1365 | putative TYPE II DNA MODIFICATION ENZYME (METHYLTRANSFERASE) |
| JHP1392 | hypothetical protein JHP1392                                 |
| JHP1393 | hypothetical protein JHP1393                                 |
| JHP1442 | TYPE II RESTRICTION ENZYME                                   |
| JHP1462 | hypothetical protein JHP1462                                 |
