# Supplementary material
Source: PubMed Central journal article supplement (PMC2393758)
Supplement: pnas_0800668105_7.pdf [file pnas_0800668105_7.pdf]

**Table 2. Kx1 genes present in at least one of the sequenced *H. pylori* reference genomes (HPAG1, 26695, J99) but absent in strain Kx2.**

| <b>Kx1 homolog</b> | <b>Annotation</b>         |
|--------------------|---------------------------|
| HP1097             | hypothetical protein      |
| JHP0952            | hypothetical protein      |
| JHP1117            | putative motility protein |
