# Supplementary material
Source: PubMed Central journal article supplement (PMC2393758)
Supplement: pnas_0800668105_8.pdf [file pnas_0800668105_8.pdf]

**Table 3. Positively selected genes in Kx1 and Kx2.**

| <b>HPAG1 homolog</b> | <b>26695 homolog</b> | <b>J99 homolog</b> | <b>Annotation</b>                       |
|----------------------|----------------------|--------------------|-----------------------------------------|
| HPAG1_0462           | HP0486               | JHP0438            | outer membrane protein HofC             |
| HPAG1_0955           | HP0974               | JHP0908            | phosphoglycerate mutase ( <i>pgm</i> )  |
| HPAG1_0960           | HP0979               | JHP0913            | cell division protein ( <i>ftsZ</i> )   |
| HPAG1_1104           | HP1165               | JHP1092            | tetracycline resistance protein TetA(P) |
| HPAG1_1434           | HP1479               | JHP1372            | hypothetical protein                    |
