# Supplementary material
Source: PubMed Central journal article supplement (PMC2393758)
Supplement: pnas_0800668105_9.pdf [file pnas_0800668105_9.pdf]

**Table 4. Transcripts present in mGEPs but not npGECs**

| Affymetrix probe set ID | Gene ID | Gene description                                                                                              |
|-------------------------|---------|---------------------------------------------------------------------------------------------------------------|
| 1415803_at              | 20312   | chemokine (C-X3-C motif) ligand 1                                                                             |
| 1415913_at              | 68052   | ribosomal protein S13                                                                                         |
| 1416034_at              | 12484   | CD24a antigen                                                                                                 |
| 1416137_at              | 11750   | annexin A7                                                                                                    |
| 1416148_at              | 114128  | lysosomal-associated protein transmembrane 4B                                                                 |
| 1416203_at              | 11826   | aquaporin 1                                                                                                   |
| 1416249_at              | 192185  | NAD kinase                                                                                                    |
| 1416363_at              | 14228   | FK506 binding protein 4                                                                                       |
| 1416398_at              | 80889   | mesoderm development candidate 1                                                                              |
| 1416645_a_at            | 11576   | alpha fetoprotein                                                                                             |
| 1416646_at              | 11576   | alpha fetoprotein                                                                                             |
| 1416817_at              | 59125   | NIMA (never in mitosis gene a)-related expressed kinase 7                                                     |
| 1416940_at              | 105675  | peptidylprolyl isomerase F (cyclophilin F)                                                                    |
| 1416942_at              | 80898   | type 1 tumor necrosis factor receptor shedding aminopeptidase regulator                                       |
| 1416967_at              | 20674   | SRY-box containing gene 2                                                                                     |
| 1417089_a_at            | 12716   | creatine kinase, mitochondrial 1, ubiquitous                                                                  |
| 1417130_s_at            | 57875   | angiopoietin-like 4                                                                                           |
| 1417178_at              | 54120   | GIPC PDZ domain containing family, member 2                                                                   |
| 1417212_at              | 68241   | RIKEN cDNA 9530058B02 gene                                                                                    |
| 1417230_at              | 78255   | Ral GEF with PH domain and SH3 binding motif 2                                                                |
| 1417263_at              | 19225   | prostaglandin-endoperoxide synthase 2                                                                         |
| 1417270_at              | 57750   | WD repeat domain 12                                                                                           |
| 1417300_at              | 100340  | sphingomyelin phosphodiesterase, acid-like 3B                                                                 |
| 1417350_at              | 18457   | pallidin                                                                                                      |
| 1417363_at              | 22719   | zinc finger protein 61                                                                                        |
| 1417376_a_at            | 54725   | immunoglobulin superfamily, member 4A                                                                         |
| 1417377_at              |         |                                                                                                               |
| 1417378_at              |         |                                                                                                               |
| 1417389_at              | 14733   | glypican 1                                                                                                    |
| 1417392_a_at            | 20540   | solute carrier family 7 (cationic amino acid transporter, y+ system), member 7                                |
| 1417473_a_at            | 106564  | RIKEN cDNA 6330579B17 gene                                                                                    |
| 1417487_at              | 14283   | fos-like antigen 1                                                                                            |
| 1417488_at              | 14283   | fos-like antigen 1                                                                                            |
| 1417494_a_at            | 12870   | ceruloplasmin                                                                                                 |
| 1417495_x_at            | 12870   | ceruloplasmin                                                                                                 |
| 1417496_at              | 12870   | ceruloplasmin                                                                                                 |
| 1417497_at              | 12870   | ceruloplasmin                                                                                                 |
| 1417507_at              | 13056   | cytochrome b-561                                                                                              |
| 1417536_at              | 66492   | zinc finger, matrin type 2                                                                                    |
| 1417570_at              | 17222   | anaphase promoting complex subunit 1                                                                          |
| 1417585_at              | 54563   | nucleoporin 210                                                                                               |
| 1417617_at              | 20446   | ST6 (alpha-N-acetyl-neuraminyl-2,3-beta-galactosyl-1,3)-N-acetylgalactosaminide alpha-2,6-sialyltransferase 2 |
| 1417618_at              | 16425   | inter-alpha trypsin inhibitor, heavy chain 2                                                                  |
| 1417623_at              | 20496   | solute carrier family 12, member 2                                                                            |
| 1417661_at              | 66599   | RAD52 homolog B (S. cerevisiae)                                                                               |
| 1417662_at              | 13713   | ELK3, member of ETS oncogene family                                                                           |
| 1417747_at              | 12889   | complexin 1                                                                                                   |
| 1417755_at              | 106021  | topoisomerase I binding, arginine/serine-rich                                                                 |
| 1417812_a_at            | 16780   | laminin, beta 3                                                                                               |
| 1417814_at              | 18784   | phospholipase A2, group V                                                                                     |
| 1417852_x_at            | 12722   | chloride channel calcium activated 1                                                                          |
| 1417853_at              | 12722   | chloride channel calcium activated 1 /// chloride channel calcium activated 2                                 |
|                         | 80797   |                                                                                                               |
| 1417892_a_at            | 64384   | sirtuin 3 (silent mating type information regulation 2, homolog) 3 (S. cerevisiae)                            |
| 1417936_at              | 20308   | chemokine (C-C motif) ligand 9                                                                                |
| 1418019_at              | 12874   | carboxypeptidase D                                                                                            |
| 1418062_at              | 13628   | eukaryotic translation elongation factor 1 alpha 2                                                            |

|              |                                                                              |
|--------------|------------------------------------------------------------------------------|
| 1418148_at   | 57742 abhydrolase domain containing 1                                        |
| 1418157_at   | 13865 nuclear receptor subfamily 2, group F, member 1                        |
| 1418237_s_at | 12822 procollagen, type XVIII, alpha 1                                       |
| 1418261_at   | 20963 spleen tyrosine kinase                                                 |
| 1418294_at   | 54357 erythrocyte protein band 4.1-like 4b                                   |
| 1418307_a_at | 20234 spermine binding protein                                               |
| 1418317_at   | 16870 LIM homeobox protein 2                                                 |
| 1418356_at   | 246221 mercaptopyruvate sulfurtransferase                                    |
| 1418375_at   | 110962 DNA segment, Chr 10, Wayne State University 93, expressed             |
| 1418408_at   | 66361 zinc finger, AN1-type domain 1                                         |
| 1418409_at   | 16469 jerky                                                                  |
| 1418425_at   | 170574 trans-acting transcription factor 7                                   |
| 1418470_at   | 22612 Yamaguchi sarcoma viral (v-yes) oncogene homolog 1                     |
| 1418491_a_at | 67049 pseudouridine synthase 3                                               |
| 1418492_at   | 23893 gremlin 2 homolog, cysteine knot superfamily ( <i>Xenopus laevis</i> ) |
| 1418496_at   | 15375 forkhead box A1                                                        |
| 1418539_a_at | 19267 protein tyrosine phosphatase, receptor type, E                         |
| 1418540_a_at | 19267 protein tyrosine phosphatase, receptor type, E                         |
| 1418546_a_at | 76630 RIKEN cDNA 1700095N21 gene                                             |
| 1418554_at   | 11536 adrenomedullin receptor                                                |
| 1418595_at   | 57435 plasma membrane associated protein, S3-12                              |
| 1418643_at   | 66109 tetraspanin 13                                                         |
| 1418665_at   | 114663 inositol (myo)-1(or 4)-monophosphatase 2                              |
| 1418672_at   | 27384 aldo-keto reductase family 1, member C13                               |
| 1418752_at   | 11670 aldehyde dehydrogenase family 3, subfamily A1                          |
| 1418818_at   | 11830 aquaporin 5                                                            |
| 1418829_a_at | 13807 enolase 2, gamma neuronal                                              |
| 1418862_at   | 67856 enoyl Coenzyme A hydratase domain containing 3                         |
| 1418863_at   | 14463 GATA binding protein 4                                                 |
| 1418876_at   | 15229 forkhead box D1                                                        |
| 1418982_at   | 12606 CCAAT/enhancer binding protein (C/EBP), alpha                          |
| 1419046_at   | 59053 brain protein 16                                                       |
| 1419086_at   | 14181 fibroblast growth factor binding protein 1                             |
| 1419105_at   | 20186 nuclear receptor subfamily 1, group H, member 4                        |
| 1419109_at   | 15464 histidine rich calcium binding protein                                 |
| 1419123_a_at | 54635 platelet-derived growth factor, C polypeptide                          |
| 1419204_at   | 13388 delta-like 1 ( <i>Drosophila</i> )                                     |
| 1419209_at   | 14825 chemokine (C-X-C motif) ligand 1                                       |
| 1419247_at   | 19735 regulator of G-protein signaling 2                                     |
| 1419248_at   | 19735 regulator of G-protein signaling 2                                     |
| 1419271_at   | 18508 paired box gene 6                                                      |
| 1419292_at   | 78558 serine protease HTRA3                                                  |
| 1419305_a_at | 66153 F-box only protein 36                                                  |
| 1419401_at   | 142688 ankyrin repeat and SOCS box-containing protein 13                     |
| 1419497_at   | 12576 cyclin-dependent kinase inhibitor 1B (P27)                             |
| 1419514_at   | 18740 paired-like homeodomain transcription factor 1                         |
| 1419563_at   | 12211 baculoviral IAP repeat-containing 6                                    |
| 1419582_at   | 72082 cytochrome P450, family 2, subfamily c, polypeptide 55                 |
| 1419612_at   | 70808 RIKEN cDNA 4632415L05 gene                                             |
| 1419728_at   | 20311 chemokine (C-X-C motif) ligand 5                                       |
| 1419744_at   | 15000 histocompatibility 2, class II, locus Mb2                              |
| 1419758_at   | 18671 ATP-binding cassette, sub-family B (MDR/TAP), member 1A                |
| 1419759_at   | 18671 ATP-binding cassette, sub-family B (MDR/TAP), member 1A                |
| 1419921_s_at | 252870 Ubiquitin specific protease 7                                         |
| 1419952_at   |                                                                              |
| 1419998_at   | 224171 RIKEN cDNA C330027C09 gene                                            |
| 1420048_at   | 97455 Expressed sequence C78859                                              |
| 1420158_s_at | 224742 ATP-binding cassette, sub-family F (GCN20), member 1                  |
| 1420339_at   | 76890 RIKEN cDNA 0610016J10 gene                                             |
| 1420401_a_at | 56089 receptor (calcitonin) activity modifying protein 3                     |
| 1420411_a_at | 67073 phosphatidylinositol 4-kinase type 2 beta                              |
| 1420488_at   | 64659 mitochondrial ribosomal protein S14                                    |

|              |                                                                                                         |
|--------------|---------------------------------------------------------------------------------------------------------|
| 1420554_a_at | 170758 RAS-related C3 botulinum substrate 3                                                             |
| 1420620_a_at | 24017 ring finger protein 13                                                                            |
| 1420630_at   | 74525 RIKEN cDNA 8430419L09 gene                                                                        |
| 1420715_a_at | 19016 peroxisome proliferator activated receptor gamma                                                  |
| 1420736_at   | 20464 single-minded homolog 1 (Drosophila)                                                              |
| 1420847_a_at | 14183 fibroblast growth factor receptor 2                                                               |
| 1420931_at   | 26419 mitogen activated protein kinase 8                                                                |
| 1420957_at   | 11789 adenomatosis polyposis coli                                                                       |
| 1420974_at   | 67881 RIKEN cDNA 1810034K20 gene                                                                        |
| 1420976_at   | 17156 mannosidase, alpha, class 1A, member 2                                                            |
| 1420980_at   | 18479 p21 (CDKN1A)-activated kinase 1                                                                   |
| 1420991_at   | 107765 ankyrin repeat domain 1 (cardiac muscle)                                                         |
| 1420992_at   | 107765 ankyrin repeat domain 1 (cardiac muscle)                                                         |
| 1421014_a_at | 69634 citrate lyase beta like                                                                           |
| 1421031_a_at | 69573 RIKEN cDNA 2310016C08 gene                                                                        |
| 1421035_a_at | 99470 membrane associated guanylate kinase, WW and PDZ domain containing 3                              |
| 1421038_a_at | 16534 potassium intermediate/small conductance calcium-activated channel, subfamily N, member 4         |
| 1421041_s_at | 14857 /// glutathione S-transferase, alpha 1 (Ya) /// glutathione S-transferase, alpha 2 (Yc2)<br>14858 |
| 1421071_at   | 22346 von Hippel-Lindau syndrome homolog                                                                |
| 1421103_at   | 140780 BMP2 inducible kinase                                                                            |
| 1421134_at   | 11839 amphiregulin                                                                                      |
| 1421153_at   | 67573 lysyl oxidase-like 4                                                                              |
| 1421161_at   | 12223 betacellulin, epidermal growth factor family member                                               |
| 1421209_s_at | 16151 inhibitor of kappaB kinase gamma                                                                  |
| 1421227_at   | 14942 granzyme E                                                                                        |
| 1421237_at   | 21917 thymopoietin                                                                                      |
| 1421307_at   | 71934 carbonic anhydrase 13                                                                             |
| 1421308_at   | 71934 carbonic anhydrase 13                                                                             |
| 1421354_at   | 19092 protein kinase, cGMP-dependent, type II                                                           |
| 1421402_at   | 116871 metastasis associated 3                                                                          |
| 1421498_a_at | 68355 RIKEN cDNA 2010204K13 gene                                                                        |
| 1421551_s_at | 26388 interferon activated gene 202B                                                                    |
| 1421594_a_at | 83671 synaptotagmin-like 2                                                                              |
| 1421818_at   | 12053 B-cell leukemia/lymphoma 6                                                                        |
| 1421851_at   | 18130 DEAD/H (Asp-Glu-Ala-Asp/His) box polypeptide 26                                                   |
| 1421868_a_at | 69060 pancreatic lipase                                                                                 |
| 1421917_at   | 18595 platelet derived growth factor receptor, alpha polypeptide                                        |
| 1421935_at   | 67427 ribosomal protein S20                                                                             |
| 1421940_at   | 20842 stromal antigen 1                                                                                 |
| 1421943_at   | 21802 transforming growth factor alpha                                                                  |
| 1421948_a_at | 72140 RIKEN cDNA 2610507L03 gene                                                                        |
| 1421969_a_at | 14073 fatty acid amide hydrolase                                                                        |
| 1421978_at   | 14417 glutamic acid decarboxylase 2                                                                     |
| 1422000_at   | 27383 aldo-keto reductase family 1, member C12                                                          |
| 1422011_s_at | 22441 /// X-linked lymphocyte-regulated complex /// RIKEN cDNA 3830403N18 gene<br>70691                 |
| 1422018_at   | 15273 human immunodeficiency virus type I enhancer binding protein 2                                    |
| 1422027_a_at | 23871 E26 avian leukemia oncogene 1, 5' domain                                                          |
| 1422028_a_at | 23871 E26 avian leukemia oncogene 1, 5' domain                                                          |
| 1422135_at   | 26465 zinc finger protein 146                                                                           |
| 1422171_at   | 19214 prostaglandin D receptor                                                                          |
| 1422243_at   | 14178 fibroblast growth factor 7                                                                        |
| 1422271_at   | 19065 pancreatic polypeptide receptor 1                                                                 |
| 1422307_at   |                                                                                                         |
| 1422314_at   | 26372 chloride channel 6                                                                                |
| 1422329_a_at | 18213 neurotrophic tyrosine kinase, receptor, type 3                                                    |
| 1422604_at   | 22262 urate oxidase                                                                                     |
| 1422616_s_at | 75659 WD repeat domain 54                                                                               |

1422617\_at 22526 /// Xlr-related, meiosis regulated /// similar to XMR /// similar to LOC382277 protein  
382273 ///  
546194  
1422618\_x\_at 22526 /// Xlr-related, meiosis regulated /// similar to XMR /// similar to LOC382277 protein  
382273 ///  
546194  
1422735\_at 15220 forkhead box Q1  
1422758\_at 54371 carbohydrate sulfotransferase 2  
1422776\_at 20725 serine (or cysteine) proteinase inhibitor, clade B, member 8  
1422777\_at 23829 complement component 1, q subcomponent-like 1  
1422785\_at 114713 RAS p21 protein activator 2  
1422803\_at 83554 follistatin-like 3  
1422838\_at 16532 potassium large conductance pH-sensitive channel, subfamily M, alpha member 3  
1422843\_at  
1422927\_at 75581 RIKEN cDNA 2310016N21 gene  
1422940\_x\_at 383548 serine (or cysteine) proteinase inhibitor, clade B (ovalbumin), member 3B  
1422979\_at 64707 suppressor of variegation 3-9 homolog 2 (Drosophila)  
1423154\_at 79555 cDNA sequence BC005537  
1423184\_at 20403 SH3 domain protein 1B  
1423193\_at 66645 paraspeckle protein 1  
1423239\_at 23917 inosine 5'-phosphate dehydrogenase 1  
1423411\_at 245945 cDNA sequence BC013481  
1423429\_at 18617 reproductive homeobox on X chromosome, 5  
1423487\_at 56724 RIKEN cDNA 1200020A08 gene  
1423570\_at 11307 ATP-binding cassette, sub-family G (WHITE), member 1  
1423595\_at 67014 myc induced nuclear antigen  
1423602\_at 22029 Tnf receptor-associated factor 1  
1423660\_at 52468 CTD (carboxy-terminal domain, RNA polymerase II, polypeptide A) small phosphatase 2  
1423693\_at 109901 elastase 1, pancreatic  
1423703\_at 235036 peter pan homolog (Drosophila)  
1423748\_at 228026 pyruvate dehydrogenase kinase, isoenzyme 1  
1423841\_at 67832 brix domain containing 2  
1423924\_s\_at 52588 tetraspanin 14  
1424208\_at 19219 prostaglandin E receptor 4 (subtype EP4)  
1424228\_at 78929 polymerase (RNA) III (DNA directed) polypeptide H  
1424250\_a\_at 71704 Rho guanine nucleotide exchange factor (GEF) 3  
1424271\_at 13175 double cortin and calcium/calmodulin-dependent protein kinase-like 1  
1424404\_at 76261 RIKEN cDNA 0610040J01 gene  
1424412\_at 70155 opioid growth factor receptor-like 1  
1424451\_at 235674 3-ketoacyl-CoA thiolase B  
1424454\_at 211499 RIKEN cDNA A930025J12 gene  
1424488\_a\_at 74776 RIKEN cDNA 1110013G13 gene  
1424506\_at 233890 cDNA sequence BC026432  
1424523\_at 140580 engulfment and cell motility 1, ced-12 homolog (C. elegans)  
1424530\_at 67815 SEC14-like 2 (S. cerevisiae)  
1424570\_at 212880 DEAD (Asp-Glu-Ala-Asp) box polypeptide 46  
1424579\_at 229782 solute carrier family 35 (UDP-N-acetylglucosamine (UDP-GlcNAc) transporter), member 3  
1424580\_at 229782 solute carrier family 35 (UDP-N-acetylglucosamine (UDP-GlcNAc) transporter), member 3  
1424602\_s\_at 108138 X-ray repair complementing defective repair in Chinese hamster cells 4  
1424658\_at 216965 TAO kinase 1  
1424699\_at 232664 RIKEN cDNA 4921511K06 gene  
1424716\_at 67442 RIKEN cDNA 0610039N19 gene  
1424779\_at 28193 DNA segment, Chr 10, University of California at Los Angeles 1  
1424850\_at 26401 mitogen activated protein kinase kinase kinase 1  
1424856\_at 232975 ATPase, Na<sup>+</sup>/K<sup>+</sup> transporting, alpha 3 polypeptide  
1424860\_at 100662 RIKEN cDNA D930016D06 gene  
1424880\_at 211770 tribbles homolog 1 (Drosophila)  
1424916\_x\_at 233893 RIKEN cDNA 8030466O12 gene  
1425044\_at 16522 potassium inwardly-rectifying channel, subfamily J, member 6  
1425045\_at 211429 phospholipase A2, group IVB (cytosolic)  
1425071\_s\_at 18213 neurotrophic tyrosine kinase, receptor, type 3  
1425094\_a\_at 16874 LIM homeobox protein 6

|              |                                                                                                          |
|--------------|----------------------------------------------------------------------------------------------------------|
| 1425099_a_at | 11865 aryl hydrocarbon receptor nuclear translocator-like                                                |
| 1425114_at   | 19647 retinoblastoma binding protein 6                                                                   |
| 1425141_at   |                                                                                                          |
| 1425163_at   | 224833 expressed sequence AI661453                                                                       |
| 1425173_s_at | 229593 golgi phosphoprotein 3-like                                                                       |
| 1425177_at   | 20425 serine hydroxymethyl transferase 1 (soluble)                                                       |
| 1425178_s_at | 20425 serine hydroxymethyl transferase 1 (soluble)                                                       |
| 1425199_a_at | 226352 erythrocyte protein band 4.1-like 5                                                               |
| 1425242_at   | 69038 RIKEN cDNA 1810006K21 gene                                                                         |
| 1425320_at   | 320875 RIKEN cDNA A830023I12 gene                                                                        |
| 1425506_at   | 107589 myosin, light polypeptide kinase                                                                  |
| 1425537_at   | 19042 protein phosphatase 1A, magnesium dependent, alpha isoform                                         |
| 1425543_s_at | 109135 pleckstrin homology domain containing, family A member 5                                          |
| 1425561_at   | 70047 tRNA nucleotidyl transferase, CCA-adding, 1                                                        |
| 1425627_x_at | 14862 /// glutathione S-transferase, mu 1 /// similar to Glutathione S-transferase Mu 1 (GST class-mu 1) |
|              | 433943 (Glutathione S-transferase GT8.7) (pmGT10) (GST 1-1)                                              |
| 1425651_at   | 75570 RIKEN cDNA 1700029B21 gene                                                                         |
| 1425663_at   | 16181 interleukin 1 receptor antagonist                                                                  |
| 1425668_a_at | 20443 ST3 beta-galactoside alpha-2,3-sialyltransferase 4                                                 |
| 1425732_a_at | 17859 Max interacting protein 1                                                                          |
| 1425776_a_at | 232196 expressed sequence C87436                                                                         |
| 1425778_at   | 209176 RIKEN cDNA C230043N17 gene                                                                        |
| 1425787_a_at | 83672 synaptotagmin-like 3                                                                               |
| 1425804_at   | 15372 H6 homeo box 2                                                                                     |
| 1425862_a_at | 18704 phosphatidylinositol 3-kinase, C2 domain containing, alpha polypeptide                             |
| 1425948_a_at | 67554 solute carrier family 25, member 30                                                                |
| 1425985_s_at | 17174 mannan-binding lectin serine protease 1                                                            |
| 1426008_a_at | 11988 solute carrier family 7 (cationic amino acid transporter, y+ system), member 2                     |
| 1426021_a_at | 12545 cell division cycle 7 (S. cerevisiae)                                                              |
| 1426046_a_at | 56187 Rab geranylgeranyl transferase, a subunit                                                          |
| 1426146_a_at | 212862 choline phosphotransferase 1                                                                      |
| 1426184_a_at | 18571 programmed cell death 6 interacting protein                                                        |
| 1426258_at   | 20660 sortilin-related receptor, LDLR class A repeats-containing                                         |
| 1426314_at   | 13618 endothelin receptor type B                                                                         |
| 1426337_a_at | 21679 TEA domain family member 4                                                                         |
| 1426370_at   | 67420 male sterility domain containing 2                                                                 |
| 1426411_a_at | 20744 spermatid perinuclear RNA binding protein                                                          |
| 1426458_at   | 83997 sarcolemma associated protein                                                                      |
| 1426517_at   | 14687 guanine nucleotide binding protein, alpha z subunit                                                |
| 1426518_at   | 233276 tubulin, gamma complex associated protein 5                                                       |
| 1426571_at   | 101772 transmembrane protein 16A                                                                         |
| 1426575_at   | 208449 transmembrane protein 23                                                                          |
| 1426577_a_at | 75660 RIKEN cDNA 1810054G18 gene                                                                         |
| 1426607_at   | MRNA similar to hypothetical protein FLJ21657 (cDNA clone MGC:29320 IMAGE:5011629), complete cds         |
| 1426728_x_at | 27388 phosphatidylserine synthase 2                                                                      |
| 1426851_a_at | 18133 nephroblastoma overexpressed gene                                                                  |
| 1426852_x_at | 18133 nephroblastoma overexpressed gene                                                                  |
| 1426894_s_at | 98952 RIKEN cDNA C230093N12 gene                                                                         |
| 1426898_at   | 66513 mitogen-activated protein kinase kinase kinase 7 interacting protein 1                             |
| 1426922_s_at | 15463 HIV-1 Rev binding protein                                                                          |
| 1426929_at   | 108013 bruno-like 4, RNA binding protein (Drosophila)                                                    |
| 1426950_at   | 214424 poly (ADP-ribose) polymerase family, member 16                                                    |
| 1426955_at   | 12822 procollagen, type XVIII, alpha 1                                                                   |
| 1427050_at   | 70561 RIKEN cDNA 5730420B22 gene                                                                         |
| 1427083_a_at | 399510 mitogen-activated protein kinase kinase kinase 5                                                  |
| 1427089_at   | 72949 cyclin T2                                                                                          |
| 1427141_at   | 77022 RIKEN cDNA 2700099C18 gene                                                                         |
| 1427164_at   | 16164 interleukin 13 receptor, alpha 1                                                                   |
| 1427165_at   | 16164 interleukin 13 receptor, alpha 1                                                                   |
| 1427209_at   | 116848 bromodomain adjacent to zinc finger domain, 2A                                                    |
| 1427218_at   | 217194 kelch-like 11 (Drosophila)                                                                        |

|              |                                                                                             |
|--------------|---------------------------------------------------------------------------------------------|
| 1427346_at   | 18422 /// ovary testis transcribed /// similar to Ott protein<br>382243                     |
| 1427481_a_at | 232975 ATPase, Na <sup>+</sup> /K <sup>+</sup> transporting, alpha 3 polypeptide            |
| 1427496_at   | 99100 expressed sequence AI851464                                                           |
| 1427852_x_at | 16061 Immunoglobulin heavy chain (J558 family)                                              |
| 1427870_x_at | 16017 immunoglobulin heavy chain 4 (serum IgG1)                                             |
| 1427878_at   | 66060 RIKEN cDNA 0610010O12 gene                                                            |
| 1427920_at   | 74016 PHD finger protein 19                                                                 |
| 1427947_at   | 232987 cDNA sequence BC028440                                                               |
| 1427974_s_at | 12289 calcium channel, voltage-dependent, L type, alpha 1D subunit                          |
| 1428018_a_at | 140497 Cd300D antigen                                                                       |
| 1428074_at   | 72309 RIKEN cDNA 2310037P21 gene                                                            |
| 1428083_at   | 66961 RIKEN cDNA 2310043N10 gene                                                            |
| 1428096_at   | 76582 importin 11                                                                           |
| 1428145_at   | 52538 acetyl-Coenzyme A acyltransferase 2 (mitochondrial 3-oxoacyl-Coenzyme A thiolase)     |
| 1428635_at   | 69156 catechol-O-methyltransferase domain containing 1                                      |
| 1428649_at   | 71902 cullin associated and neddylation disassociated 1                                     |
| 1428776_at   | 75750 solute carrier family 10 (sodium/bile acid cotransporter family), member 6            |
| 1429040_at   | 381598 RIKEN cDNA 2610005L07 gene                                                           |
| 1429186_a_at | 71891 cytidine and dCMP deaminase domain containing 1                                       |
| 1429220_at   | 67228 RIKEN cDNA 2810443J12 gene                                                            |
| 1429265_a_at | 59044 ring finger protein 130                                                               |
| 1429428_at   | 21416 transcription factor 7-like 2, T-cell specific, HMG-box                               |
| 1429514_at   | 67916 phosphatidic acid phosphatase type 2B                                                 |
| 1429832_at   | 66101 peptidyl prolyl isomerase H                                                           |
| 1430147_a_at | 75316 RIKEN cDNA 4930553M18 gene                                                            |
| 1430610_at   | 60441 mitochondrial ribosomal protein L38                                                   |
| 1430700_a_at | 27226 phospholipase A2, group VII (platelet-activating factor acetylhydrolase, plasma)      |
| 1430989_a_at | 66602 RIKEN cDNA 1700020I14 gene                                                            |
| 1431166_at   |                                                                                             |
| 1431280_at   | 103266 expressed sequence AI597468                                                          |
| 1431611_a_at | 54725 immunoglobulin superfamily, member 4A                                                 |
| 1431686_a_at | 63985 glia maturation factor, beta                                                          |
| 1431704_a_at | 78255 Ral GEF with PH domain and SH3 binding motif 2                                        |
| 1431772_a_at | 20403 SH3 domain protein 1B                                                                 |
| 1431843_a_at | 18037 nuclear factor of kappa light polypeptide gene enhancer in B-cells inhibitor, epsilon |
| 1431890_a_at | 70122 myeloid/lymphoid or mixed lineage-leukemia translocation to 3 homolog (Drosophila)    |
| 1432187_at   | 69912 nucleoporin 43                                                                        |
| 1432360_a_at | 70551 RIKEN cDNA 4930403J22 gene                                                            |
| 1432418_a_at | 12716 creatine kinase, mitochondrial 1, ubiquitous                                          |
| 1433407_at   | 70024 minichromosome maintenance deficient 10 (S. cerevisiae)                               |
| 1433477_at   | 109934 active BCR-related gene                                                              |
| 1433952_at   | 233870 Tu translation elongation factor, mitochondrial                                      |
| 1434099_at   | Transcribed locus                                                                           |
| 1434210_s_at | 16206 leucine-rich repeats and immunoglobulin-like domains 1                                |
| 1434239_at   | 107094 expressed sequence AA408556                                                          |
| 1434272_at   | 231207 cytoplasmic polyadenylation element binding protein 2                                |
| 1434279_at   |                                                                                             |
| 1434325_x_at | 19085 protein kinase, cAMP dependent regulatory, type I beta                                |
| 1434343_at   | 232853 RIKEN cDNA 5730403M16 gene                                                           |
| 1434364_at   | 53859 mitogen-activated protein kinase kinase kinase 14                                     |
| 1434537_at   | 108116 solute carrier organic anion transporter family, member 3a1                          |
| 1434587_x_at | 27388 phosphatidylserine synthase 2                                                         |
| 1434839_s_at | 81004 transducin (beta)-like 1X-linked receptor 1                                           |
| 1434988_x_at | 11669 aldehyde dehydrogenase 2, mitochondrial                                               |
| 1435117_a_at | 217378 RIKEN cDNA C330021A05 gene                                                           |
| 1435169_at   | 77128 RIKEN cDNA A930001N09 gene                                                            |
| 1435258_at   | 51875 DNA segment, Chr 2, ERATO Doi 217, expressed                                          |
| 1435317_x_at | 26443 proteasome (prosome, macropain) subunit, alpha type 6                                 |
| 1435837_at   | 12955 crystallin, alpha B                                                                   |
| 1435870_at   | 20962 Synaptonemal complex protein 3                                                        |

1435945\_a\_at 16534 potassium intermediate/small conductance calcium-activated channel, subfamily N, member 4

1435958\_at 55981 /// phosphatidylinositol glycan, class B /// cell cycle progression 1  
72278

1436092\_at Transcribed locus, moderately similar to XP\_331555.1 hypothetical protein [Neurospora crassa]

1436255\_at 381922 RIKEN cDNA D830044I16 gene

1436337\_at 319689 RIKEN cDNA E030031F02 gene

1436404\_at 268449 Ribosomal protein L23a

1436528\_at 107250 Kazal-type serine protease inhibitor domain 1

1436820\_at 216858 potassium channel tetramerisation domain containing 11

1437074\_at 69178 sorting nexin 5

1437502\_x\_at 12484 CD24a antigen

1437618\_x\_at 64450 G protein-coupled receptor 85

1437634\_at 331401 RIKEN cDNA 6330441O12 gene

1437645\_at 223922 activating transcription factor 7

1437742\_at 216344 RAB21, member RAS oncogene family

1437882\_s\_at 319615 /// RIKEN cDNA 3110048L19 gene /// RIKEN cDNA 6330416L07 gene  
73233

1437994\_x\_at 70427 RIKEN cDNA 2700087H15 gene

1438082\_at 66950 RIKEN cDNA 2310028N02 gene

1438156\_x\_at 12894 carnitine palmitoyltransferase 1a, liver

1438173\_x\_at 67037 polyamine-modulated factor 1

1438204\_at 50708 Histone 1, H1c

1438483\_at

1438527\_at 244512 /// ribosomal protein L3 /// similar to 60S ribosomal protein L3 (L4) /// similar to Ribosomal protein L3  
27367 ///  
433745

1438602\_s\_at 17174 mannan-binding lectin serine protease 1

1438952\_x\_at

1439065\_x\_at 433796 Similar to RIKEN cDNA 6330416L07 gene

1439080\_at 59079 ErbB2 interacting protein

1439185\_x\_at 228607 RIKEN cDNA D430028G21 gene

1439246\_x\_at 233833 trinucleotide repeat containing 6a

1439416\_x\_at 227613 /// RIKEN cDNA 4930542G03 gene /// similar to Tubulin beta-2 chain  
433839

1439483\_at 433855 expressed sequence AI506816

1440230\_at 244152 RIKEN cDNA 9530051K01 gene

1441992\_at 68365 RAB14, member RAS oncogene family

1442540\_at 96961 expressed sequence C77609

1447631\_at 217127 MYST histone acetyltransferase 2

1447977\_x\_at

1448237\_x\_at 16832 lactate dehydrogenase 2, B chain

1448321\_at 64075 SPARC related modular calcium binding 1

1448445\_at 66659 acid phosphatase 6, lysophosphatidic

1448468\_a\_at 16497 potassium voltage-gated channel, shaker-related subfamily, beta member 1

1448518\_at 56322 translocase of inner mitochondrial membrane 22 homolog (yeast)

1448734\_at 12870 ceruloplasmin

1448735\_at 12870 ceruloplasmin

1448821\_at 22173 tyrosinase

1448834\_at 14235 forkhead box M1

1448908\_at 67916 phosphatidic acid phosphatase type 2B

1448961\_at 18828 phospholipid scramblase 2

1448994\_at 20683 trans-acting transcription factor 1

1449021\_at 67676 ribonuclease P 21 subunit (human)

1449023\_a\_at 14055 enhancer of zeste homolog 1 (Drosophila)

1449036\_at 66889 ring finger protein 128

1449133\_at 20753 small proline-rich protein 1A

1449147\_at 76969 carbohydrate (keratan sulfate Gal-6) sulfotransferase 1

1449163\_at 24058 expressed sequence AI256711

1449269\_at 14067 coagulation factor V

1449391\_at 22696 zinc finger protein 37

|              |                                                                                                                 |
|--------------|-----------------------------------------------------------------------------------------------------------------|
| 1449488_at   | 18740 paired-like homeodomain transcription factor 1                                                            |
| 1449542_at   | 18514 pre B-cell leukemia transcription factor 1                                                                |
| 1449620_s_at | 28001 DNA segment, Chr 16, Wayne State University 65, expressed                                                 |
| 1449673_s_at | 233870 Tu translation elongation factor, mitochondrial                                                          |
| 1449680_at   | 97816 expressed sequence C80678                                                                                 |
| 1449703_at   | 100494 Expressed sequence AA407930                                                                              |
| 1449861_at   | 23955 NIMA (never in mitosis gene a)-related expressed kinase 4                                                 |
| 1449893_a_at | 16206 leucine-rich repeats and immunoglobulin-like domains 1                                                    |
| 1449965_at   | 17231 mast cell protease 8                                                                                      |
| 1450051_at   | 22589 alpha thalassemia/mental retardation syndrome X-linked homolog (human)                                    |
| 1450057_at   | 66460 RIKEN cDNA 2610042O14 gene                                                                                |
| 1450134_at   | 67573 lysyl oxidase-like 4                                                                                      |
| 1450144_at   | 18779 phospholipase A2, group IB, pancreas, receptor                                                            |
| 1450147_at   | 73340 neuronal pentraxin receptor                                                                               |
| 1450171_x_at | 14942 granzyme E                                                                                                |
| 1450218_at   |                                                                                                                 |
| 1450223_at   | 11783 apoptotic protease activating factor 1                                                                    |
| 1450234_at   | 73656 membrane-spanning 4-domains, subfamily A, member 6C                                                       |
| 1450306_at   | 22786 zona pellucida glycoprotein 1                                                                             |
| 1450335_at   |                                                                                                                 |
| 1450381_a_at | 12053 B-cell leukemia/lymphoma 6                                                                                |
| 1450389_s_at | 18719 phosphatidylinositol-4-phosphate 5-kinase, type 1 alpha                                                   |
| 1450401_at   | 116940 nuclear receptor coactivator 6 interacting protein                                                       |
| 1450406_a_at | 20441 ST3 beta-galactoside alpha-2,3-sialyltransferase 3                                                        |
| 1450413_at   | 18591 platelet derived growth factor, B polypeptide                                                             |
| 1450414_at   | 18591 platelet derived growth factor, B polypeptide                                                             |
| 1450455_s_at | 27383 aldo-keto reductase family 1, member C12                                                                  |
| 1450472_s_at | 17127 MAD homolog 3 (Drosophila)                                                                                |
| 1450542_s_at | 17137 /// melanoma antigen, family A, 1 /// melanoma antigen, family A, 2 /// melanoma antigen, family A, 3 /// |
|              | 17138 /// melanoma antigen, family A, 5 /// melanoma antigen, family A, 6 /// melanoma antigen, family A, 8     |
|              | 17139 ///                                                                                                       |
|              | 17141 ///                                                                                                       |
|              | 17142 ///                                                                                                       |
|              | 17144                                                                                                           |
| 1450619_x_at | 57358 cell matrix adhesion regulator                                                                            |
| 1450627_at   | 11732 progressive ankylosis                                                                                     |
| 1450649_at   | 14700 guanine nucleotide binding protein (G protein), gamma 10                                                  |
| 1450657_at   | 56031 peptidylprolyl isomerase E (cyclophilin E)                                                                |
| 1450766_at   | 78600 phosphodiesterase 6H, cGMP-specific, cone, gamma                                                          |
| 1450829_at   | 21929 tumor necrosis factor, alpha-induced protein 3                                                            |
| 1450869_at   | 14164 fibroblast growth factor 1                                                                                |
| 1451007_at   | 94219 cyclin M2                                                                                                 |
| 1451010_at   | 68979 RIKEN cDNA 1500002M01 gene                                                                                |
| 1451043_at   | 59126 NIMA (never in mitosis gene a)-related expressed kinase 6                                                 |
| 1451045_at   | 80976 synaptotagmin XIII                                                                                        |
| 1451158_at   | 14897 thyroid hormone receptor interactor 12                                                                    |
| 1451236_at   | 232441 RAS-like, estrogen-regulated, growth-inhibitor                                                           |
| 1451261_s_at | 106766 expressed sequence AW049765                                                                              |
| 1451318_a_at | 17096 Yamaguchi sarcoma viral (v-yes-1) oncogene homolog                                                        |
| 1451322_at   | 69574 RIKEN cDNA 2310016A09 gene                                                                                |
| 1451338_at   | 64652 nischarin                                                                                                 |
| 1451348_at   | 97998 DEP domain containing 6                                                                                   |
| 1451352_s_at | 116871 metastasis associated 3                                                                                  |
| 1451386_at   | 233016 biliverdin reductase B (flavin reductase (NADPH))                                                        |
| 1451391_at   | 214764 RIKEN cDNA 2700050L05 gene                                                                               |
| 1451411_at   | 64297 G protein-coupled receptor, family C, group 5, member B                                                   |
| 1451415_at   | 69068 RIKEN cDNA 1810011O10 gene                                                                                |
| 1451422_at   | 360013 myosin XVIIIa                                                                                            |
| 1451425_a_at | 54484 makorin, ring finger protein, 1                                                                           |
| 1451477_at   | 545705 /// similar to RIKEN cDNA 1700029I01 /// hypothetical protein LOC545706                                  |
|              | 545706                                                                                                          |
| 1451524_at   | 30050 F-box and WD-40 domain protein 2                                                                          |



|              |                                                                                                                                                        |
|--------------|--------------------------------------------------------------------------------------------------------------------------------------------------------|
| 1451527_at   | 76477 procollagen C-endopeptidase enhancer 2                                                                                                           |
| 1451529_at   | 218544 small glutamine-rich tetratricopeptide repeat (TPR)-containing, beta                                                                            |
| 1451538_at   | 20682 SRY-box containing gene 9                                                                                                                        |
| 1451542_at   | 66970 single-stranded DNA binding protein 2                                                                                                            |
| 1451555_at   | 75805 neurolysin (metallopeptidase M3 family)                                                                                                          |
| 1451619_at   | 229593 golgi phosphoprotein 3-like                                                                                                                     |
| 1451626_x_at |                                                                                                                                                        |
| 1451739_at   | 12224 Kruppel-like factor 5                                                                                                                            |
| 1451753_at   | 18845 plexin A2                                                                                                                                        |
| 1451775_s_at | 16164 interleukin 13 receptor, alpha 1                                                                                                                 |
| 1451780_at   | 17060 B-cell linker                                                                                                                                    |
| 1451794_at   | 319880 transmembrane and coiled coil domains 3                                                                                                         |
| 1451835_at   | 223227 SRY-box containing gene 21                                                                                                                      |
| 1451867_x_at | 11856 Rho GTPase activating protein 6                                                                                                                  |
| 1451965_at   | 381784 Similar to V(kappa) gene product                                                                                                                |
| 1452115_a_at | 20873 polo-like kinase 4 (Drosophila)                                                                                                                  |
| 1452124_at   | 11735 /// ankyrin 3, epithelial /// RIKEN cDNA 2900054D09 gene<br>73013                                                                                |
| 1452137_at   | 170760 acyl-Coenzyme A binding domain containing 3                                                                                                     |
| 1452202_at   | 207728 phosphodiesterase 2A, cGMP-stimulated                                                                                                           |
| 1452244_at   | 70717 RIKEN cDNA 6330406115 gene                                                                                                                       |
| 1452278_a_at | 209462 HECT domain and ankyrin repeat containing, E3 ubiquitin protein ligase 1                                                                        |
| 1452294_at   | 75599 protocadherin 1                                                                                                                                  |
| 1452301_at   | 67689 aldehyde dehydrogenase 3 family, member B1                                                                                                       |
| 1452319_at   | 330502 zinc finger protein 82                                                                                                                          |
| 1452324_at   | 19296 plasmacytoma variant translocation 1                                                                                                             |
| 1452361_at   | 109331 ring finger protein 20                                                                                                                          |
| 1452369_at   | 14924 membrane associated guanylate kinase, WW and PDZ domain containing 1                                                                             |
| 1452566_at   | Mus musculus, clone IMAGE:3983821, mRNA, partial cds                                                                                                   |
| 1452592_at   | 211666 microsomal glutathione S-transferase 2                                                                                                          |
| 1452635_x_at | 75316 RIKEN cDNA 4930553M18 gene                                                                                                                       |
| 1452657_at   | 108012 adaptor-related protein complex 1, sigma 2 subunit                                                                                              |
| 1452677_at   | 71701 polyribonucleotide nucleotidyltransferase 1                                                                                                      |
| 1452688_at   | 328110 PRP39 pre-mRNA processing factor 39 homolog (yeast)                                                                                             |
| 1452705_at   | 94184 expressed sequence AA415817                                                                                                                      |
| 1452836_at   | 64898 lipin 2                                                                                                                                          |
| 1453343_s_at | 69922 vaccinia related kinase 2                                                                                                                        |
| 1453413_at   | 14683 GNAS (guanine nucleotide binding protein, alpha stimulating) complex locus                                                                       |
| 1453472_a_at | 75345 SLAM family member 7                                                                                                                             |
| 1453550_a_at | 67420 male sterility domain containing 2                                                                                                               |
| 1453589_a_at | 381598 RIKEN cDNA 2610005L07 gene                                                                                                                      |
| 1454043_a_at | 16497 potassium voltage-gated channel, shaker-related subfamily, beta member 1                                                                         |
| 1454070_a_at | 114874 DDHD domain containing 1                                                                                                                        |
| 1454107_a_at | 16563 kinesin family member 2A                                                                                                                         |
| 1454779_s_at | 101831 RIKEN cDNA C230052112 gene                                                                                                                      |
| 1454970_at   |                                                                                                                                                        |
| 1455109_at   | 81004 transducin (beta)-like 1X-linked receptor 1                                                                                                      |
| 1455214_at   | 17342 microphthalmia-associated transcription factor                                                                                                   |
| 1455235_x_at | 16832 lactate dehydrogenase 2, B chain                                                                                                                 |
| 1455393_at   |                                                                                                                                                        |
| 1455462_at   | 210044 adenylate cyclase 2                                                                                                                             |
| 1455625_at   |                                                                                                                                                        |
| 1455715_at   | 16 days neonate thymus cDNA, RIKEN full-length enriched library, clone:A130096B22<br>product:hypothetical protein, full insert sequence                |
| 1455946_x_at | 19240 thymosin, beta 10                                                                                                                                |
| 1456048_at   |                                                                                                                                                        |
| 1456104_at   | 69077 proteasome (prosome, macropain) 26S subunit, non-ATPase, 11                                                                                      |
| 1456313_x_at | 68611 mitochondrial ribosomal protein L28                                                                                                              |
| 1456365_at   | 22186 /// ubiquitin A-52 residue ribosomal protein fusion product 1 /// similar to ubiquitin A-52 residue<br>332993 ribosomal protein fusion product 1 |
| 1456395_at   | 19017 peroxisome proliferative activated receptor, gamma, coactivator 1 alpha                                                                          |
| 1456437_x_at |                                                                                                                                                        |

|              |                                                                                                                                |
|--------------|--------------------------------------------------------------------------------------------------------------------------------|
| 1456528_x_at |                                                                                                                                |
| 1460214_at   | Purkinje cell protein 4                                                                                                        |
| 1460239_at   | 66109 tetraspanin 13                                                                                                           |
| 1460257_a_at | 107885 5, 10-methenyltetrahydrofolate synthetase                                                                               |
| 1460259_s_at | 12722 /// chloride channel calcium activated 1 /// chloride channel calcium activated 2<br>80797                               |
| 1460265_at   | 18813 Proliferation-associated 2G4                                                                                             |
| 1460283_at   | 54483 Mediterranean fever                                                                                                      |
| 1460469_at   | 21942 tumor necrosis factor receptor superfamily, member 9                                                                     |
| 1460555_at   | 193385 RIKEN cDNA 6330500D04 gene                                                                                              |
| 1460562_at   | 101592 elongation factor Tu GTP binding domain containing 1                                                                    |
| 1460729_at   | 19877 Rho-associated coiled-coil forming kinase 1                                                                              |
| 1460746_at   | 60530 fidgetin-like 1                                                                                                          |
| 1419924_at   |                                                                                                                                |
| 1420276_x_at |                                                                                                                                |
| 1428170_at   | 210135 zinc finger protein 180                                                                                                 |
| 1428192_at   | 211255 gene model 295, (NCBI)                                                                                                  |
| 1428234_at   | 432508 cleavage and polyadenylation specific factor 6                                                                          |
| 1428281_at   | 72133 TruB pseudouridine (psi) synthase homolog 1 (E. coli)                                                                    |
| 1428321_at   | 68519 echinoderm microtubule associated protein like 1                                                                         |
| 1428393_at   | 68404 neuritin 1                                                                                                               |
| 1428479_at   | 18018 nuclear factor of activated T-cells, cytoplasmic, calcineurin-dependent 1                                                |
| 1428604_at   | 112422 RIKEN cDNA 2610305D13 gene                                                                                              |
| 1428622_at   | 97998 DEP domain containing 6                                                                                                  |
| 1428671_at   | 72275 RIKEN cDNA 2200002D01 gene                                                                                               |
| 1428692_at   | 68695 RIKEN cDNA 1110033O09 gene                                                                                               |
| 1428694_at   | 75957 RIKEN cDNA 5033413D16 gene                                                                                               |
| 1428724_at   | 74737 RIKEN cDNA 2500001H09 gene                                                                                               |
| 1428749_at   | 235380 Dmx-like 2                                                                                                              |
| 1428801_at   | 17309 mannoside acetylglucosaminyltransferase 3                                                                                |
| 1428902_at   | 68647 RIKEN cDNA 1110020P09 gene                                                                                               |
| 1428951_at   | 70930 nucleolar protein 8                                                                                                      |
| 1428986_at   | 72961 solute carrier family 17 (sodium-dependent inorganic phosphate cotransporter), member 7                                  |
| 1429034_at   | 193838 essential meiotic endonuclease 1 homolog 2 (S. pombe)                                                                   |
| 1429071_at   | 109264 malic enzyme 3, NADP(+)-dependent, mitochondrial                                                                        |
| 1429106_at   | 70857 RIKEN cDNA 4921509J17 gene                                                                                               |
| 1429205_at   | 70122 myeloid/lymphoid or mixed lineage-leukemia translocation to 3 homolog (Drosophila)                                       |
| 1429213_at   | 76947 RIKEN cDNA 2310030N02 gene                                                                                               |
| 1429267_at   | 329910 thioesterase, adipose associated                                                                                        |
| 1429268_at   | 70458 RIKEN cDNA 2610318N02 gene                                                                                               |
| 1429272_a_at | 108956 /// RIKEN cDNA 9130022K13 gene /// RIKEN cDNA 2210421G13 gene /// hypothetical protein<br>193676 /// LOC193676<br>75761 |
| 1429390_at   | 235534 acid phosphatase-like 2                                                                                                 |
| 1429509_at   |                                                                                                                                |
| 1429537_at   | 66625 RIKEN cDNA 5730406M06 gene                                                                                               |
| 1429600_at   | 68621 RIKEN cDNA 1110019K23 gene                                                                                               |
| 1429612_at   | 78798 echinoderm microtubule associated protein like 4                                                                         |
| 1429625_at   | 73049 RIKEN cDNA 2900054C01 gene                                                                                               |
| 1429798_s_at | 67272 chemokine-like factor super family 5                                                                                     |
| 1429863_at   | 102994 RIKEN cDNA A830039N02 gene                                                                                              |
| 1429887_at   | 76730 RIKEN cDNA 2310005C01 gene                                                                                               |
| 1429903_at   | 19708 D4, zinc and double PHD fingers family 2                                                                                 |
| 1429937_at   | 78581 RIKEN cDNA D530033C11 gene                                                                                               |
| 1429949_at   | 76245 RIKEN cDNA 6530415H11 gene                                                                                               |
| 1429996_at   | 70760 RIKEN cDNA 6330417A16 gene                                                                                               |
| 1430051_at   | 214639 RIKEN cDNA 4930486L24 gene                                                                                              |
| 1430088_at   | 70227 RIKEN cDNA 3000002G13 gene                                                                                               |
| 1430183_at   | 71633 RIKEN cDNA 4833414E09 gene                                                                                               |
| 1430214_a_at | 434234 RIKEN cDNA 2610020H08 gene                                                                                              |
| 1430277_at   | 77289 RIKEN cDNA 9430034F23 gene                                                                                               |
| 1430302_at   | 380686 RIKEN cDNA 1500041B16 gene                                                                                              |

|              |                                                                                                              |
|--------------|--------------------------------------------------------------------------------------------------------------|
| 1430324_x_at | 73415 RIKEN cDNA 1700049E17 gene                                                                             |
| 1430353_at   | 226075 GLIS family zinc finger 3                                                                             |
| 1430367_at   | 76630 RIKEN cDNA 1700095N21 gene                                                                             |
| 1430390_x_at | 114671 RIKEN cDNA 4930444G20 gene                                                                            |
| 1430582_at   | 268281 SNF2 histone linker PHD RING helicase                                                                 |
| 1430640_a_at | 19088 protein kinase, cAMP dependent regulatory, type II beta                                                |
| 1430748_at   | 67509 RIKEN cDNA 1810063B07 gene                                                                             |
| 1430846_at   | 78625 RIKEN cDNA 1700061G19 gene                                                                             |
| 1430904_at   | 66251 ADP-ribosylation factor GTPase activating protein 3                                                    |
| 1430991_at   | 544717 RIKEN cDNA 1810014B01 gene                                                                            |
| 1431065_at   | 74427 ELL associated factor 1                                                                                |
| 1431113_at   | 66704 RIKEN cDNA 4921506I22 gene                                                                             |
| 1431165_at   | 77763 RIKEN cDNA A030009A09 gene                                                                             |
| 1431183_at   | 73467 RIKEN cDNA 1700066M21 gene                                                                             |
| 1431212_a_at | 66926 RIKEN cDNA 3300001M20 gene                                                                             |
| 1431234_at   | 73338 RIKEN cDNA 1700041B20 gene                                                                             |
| 1431352_s_at | 19296 plasmacytoma variant translocation 1                                                                   |
| 1431443_at   | 69062 RIKEN cDNA 1810008B01 gene                                                                             |
| 1431806_at   | 77059 RIKEN cDNA 4931408D14 gene                                                                             |
| 1431883_at   | 21333 tachykinin 1                                                                                           |
| 1431996_at   |                                                                                                              |
| 1432114_at   | 68672 RIKEN cDNA 1110035E04 gene                                                                             |
| 1432277_at   | 75309 RIKEN cDNA 4930565D16 gene                                                                             |
| 1432423_a_at | 320827 RIKEN cDNA C530008M17 gene                                                                            |
| 1432489_a_at | 76773 RIKEN cDNA 2410187C16 gene                                                                             |
| 1432506_at   | 68255 RIKEN cDNA C330014O21 gene                                                                             |
| 1432555_at   | 73750 whirlin                                                                                                |
| 1432949_at   | 78288 RIKEN cDNA 5330421F21 gene                                                                             |
| 1432971_at   | 76859 RIKEN cDNA 4921518B13 gene                                                                             |
| 1433070_at   | 76047 RIKEN cDNA 5830433M15 gene                                                                             |
| 1433101_at   | 71512 RIKEN cDNA 9030419F21 gene                                                                             |
| 1433205_at   | 72762 RIKEN cDNA 2810436B12 gene                                                                             |
| 1433465_a_at | 101602 expressed sequence A1467606                                                                           |
| 1433505_a_at | 231549 leucine rich repeat containing 5                                                                      |
| 1433557_at   | 52609 chromobox homolog 7                                                                                    |
| 1433583_at   | 216049 zinc finger protein 365                                                                               |
| 1433818_at   | 28169 1-acylglycerol-3-phosphate O-acyltransferase 3                                                         |
| 1433825_at   | 18213 RIKEN cDNA E430016F16 gene                                                                             |
| 1433944_at   | 226098 HECT domain containing 2                                                                              |
| 1433998_at   | 74477 RIKEN cDNA 4933427D14 gene                                                                             |
| 1434013_at   | 319713 actin binding LIM protein family, member 3                                                            |
| 1434111_at   | 99633 latrophilin 2                                                                                          |
| 1434252_at   | 319880 transmembrane and coiled coil domains 3                                                               |
| 1434266_at   | 330050 expressed sequence A1847670                                                                           |
| 1434270_at   | 73340 neuronal pentraxin receptor                                                                            |
| 1434456_at   | 242819 gene model 440, (NCBI)                                                                                |
| 1434470_at   | 80976 synaptotagmin XIII                                                                                     |
| 1434687_at   | 245007 Zinc finger and BTB domain containing 38                                                              |
| 1434754_at   | 380711 GTPase activating RANGAP domain-like 4                                                                |
| 1434766_at   | 108079 Protein kinase, AMP-activated, alpha 2 catalytic subunit                                              |
| 1434789_at   | 218581 DEP domain containing 1B                                                                              |
| 1434980_at   | 320207 phosphoinositide-3-kinase, regulatory subunit 5, p101                                                 |
| 1435001_at   | 18786 phospholipase A2, activating protein                                                                   |
| 1435033_at   | 226970 RIKEN cDNA 9330140K16 gene                                                                            |
| 1435040_at   | 73914 interleukin-1 receptor-associated kinase 3                                                             |
| 1435050_at   | 215821 DNA segment, Chr 10, Brigham & Women's Genetics 1379 expressed                                        |
| 1435076_at   | 116972 RIKEN cDNA 2310047D13 gene                                                                            |
| 1435108_at   | 239027 Rho GTPase activating protein 22                                                                      |
| 1435234_at   | 17978 nuclear receptor coactivator 2                                                                         |
| 1435249_at   | 107182 BTA1 RNA polymerase II, B-TFIID transcription factor-associated, 170kDa (Mot1 homolog, S. cerevisiae) |
| 1435292_at   | 210789 TBC1 domain family, member 4                                                                          |

1435299\_at 328322 hypothetical protein C230069N13  
1435302\_at 72504 TAF4B RNA polymerase II, TATA box binding protein (TBP)-associated factor  
1435515\_at Transcribed locus  
1435554\_at 319880 transmembrane and coiled coil domains 3  
1435612\_at 330908 opioid binding protein/cell adhesion molecule-like  
1435617\_at 106606 expressed sequence AI480743  
1435649\_at 68810 nexilin  
1435656\_at 229363 guanine monphosphate synthetase  
1435658\_at 26457 Solute carrier family 27 (fatty acid transporter), member 1  
1435750\_at 320415 GTP cyclohydrolase I feedback regulator  
1435763\_at 207592 TBC1 domain family, member 16  
1435836\_at 228026 Pyruvate dehydrogenase kinase, isoenzyme 1  
1435867\_at Transcribed locus  
1435916\_at 75684 RIKEN cDNA 2210410P13 gene  
1435936\_at Transcribed locus  
1436103\_at 216363 RAB3A interacting protein  
1436155\_at 226518 nicotinamide nucleotide adenylyltransferase 2  
1436314\_at 213326 SCY1-like 2 (*S. cerevisiae*)  
1436346\_at 235505 CD109 antigen  
1436353\_at 319277 RIKEN cDNA A230046K03 gene  
1436360\_at 232878 GLI-Kruppel family member HKR2  
1436375\_at 78586 RIKEN cDNA D530025C17 gene  
1436434\_at 329958 hypothetical protein 9230110J10  
1436550\_at 71865 F-box protein 30  
1436601\_at 243867 F-box protein 46  
1436711\_at 109275 ARP5 actin-related protein 5 homolog (yeast)  
1436735\_at 106338 NOL1/NOP2/Sun domain family 3  
1436892\_at 114716 sprouty-related, EVH1 domain containing 2  
1436894\_at 27877 DNA segment, Chr 1, ERATO Doi 471, expressed  
1437069\_at 237542 oxysterol binding protein-like 8  
1437118\_at 252870 ubiquitin specific protease 7  
1437197\_at 234214 RIKEN cDNA 9430041O17 gene  
1437265\_at 327824 RIKEN cDNA 5330438D12 gene  
1437298\_at 68524 RIKEN cDNA 5730509C05 gene  
1437322\_at 19653 RNA binding motif protein 4  
1437372\_at 432508 cleavage and polyadenylation specific factor 6  
1437375\_at 0 day neonate thymus cDNA, RIKEN full-length enriched library, clone:A430010E21  
product:hypothetical Phenylalanine-rich region containing protein, full insert sequence  
1437403\_at 320825 RIKEN cDNA E130306M17 gene  
1437409\_s\_at 215798 G protein-coupled receptor 126  
1437481\_at 70891 speedy homolog 1 (*Drosophila*)  
1437638\_at 75956 serine/arginine repetitive matrix 2  
1437654\_at 75698 RIKEN cDNA 3110001K24 gene  
1437737\_at 213550 expressed sequence AV340375  
1437785\_at 101401 a disintegrin-like and metalloprotease (reprolysin type) with thrombospondin type 1 motif, 9  
1437942\_x\_at 71924 epsilon-tubulin 1  
1437965\_at 217995 RIKEN cDNA B130016L12 gene  
1438012\_at 242083 protein phosphatase 1 (formerly 2C)-like  
1438032\_at 380916 leucine-rich repeats and calponin homology (CH) domain containing 1  
1438042\_at 20429 short stature homeobox 2  
1438055\_at 109222 retinoic acid receptor responder (tazarotene induced) 1  
1438127\_at 552906 hypothetical LOC552906  
1438259\_at  
1438339\_at 211651 Fanconi anemia, complementation group D2  
1438445\_at 72267 leucine rich repeat containing 8 family, member E  
1438473\_at 218639 ADP-ribosylation factor related protein 2  
1438475\_at  
1438489\_at  
1438513\_at 69694 TatD DNase domain containing 1  
1438583\_at 78943 Endoplasmic reticulum (ER) to nucleus signalling 1  
1438664\_at 19088 protein kinase, cAMP dependent regulatory, type II beta  
1438672\_at CDNA, clone:Y1G0115A05, strand:unspecified

|              |                                                                                                                                       |
|--------------|---------------------------------------------------------------------------------------------------------------------------------------|
| 1438740_at   | 18108 N-myristoyltransferase 2                                                                                                        |
| 1438830_at   | T-complex responder, Smok(Tcr) gene, t6 allele strain t-haplotype t6                                                                  |
| 1439059_at   | 245622 CDNA sequence BC031748                                                                                                         |
| 1439155_at   | 17299 methyltransferase-like 1                                                                                                        |
| 1439158_at   | 228012 tousled-like kinase 1                                                                                                          |
| 1439307_at   | 12558 Cadherin 2                                                                                                                      |
| 1439363_at   | 66874 RIKEN cDNA 1200014J11 gene                                                                                                      |
| 1439517_at   | 320713 RIKEN cDNA C130067A03 gene                                                                                                     |
| 1439520_at   | 76843 RIKEN cDNA 2810047L02 gene                                                                                                      |
| 1439623_at   | Transcribed locus                                                                                                                     |
| 1439638_at   | 59079 Erbb2 interacting protein                                                                                                       |
| 1439727_at   | 545573 /// chloride channel calcium activated 6 /// similar to calcium activated chloride channel<br>99663                            |
| 1439774_at   | 18933 paired related homeobox 1                                                                                                       |
| 1439830_at   | 26408 mitogen activated protein kinase kinase kinase 5                                                                                |
| 1439965_at   | Transcribed locus                                                                                                                     |
| 1440013_at   | 80985 Tripartite motif-containing 44                                                                                                  |
| 1440092_at   | 14042 Exostoses (multiple) 1                                                                                                          |
| 1440094_at   | 407795 cDNA sequence BC030870                                                                                                         |
| 1440145_at   |                                                                                                                                       |
| 1440185_x_at | 56459 Ubiquitin-like 1 (sentrin) activating enzyme E1A                                                                                |
| 1440193_at   | 106585 ankyrin repeat domain 12                                                                                                       |
| 1440199_at   | 328258 hypothetical protein E230025K15                                                                                                |
| 1440202_at   |                                                                                                                                       |
| 1440248_at   | 319996 cancer susceptibility candidate 4                                                                                              |
| 1440263_at   | 211064 alkB, alkylation repair homolog (E. coli)                                                                                      |
| 1440329_s_at | 67769 G patch domain containing 2                                                                                                     |
| 1440369_at   | Transcribed locus                                                                                                                     |
| 1440409_at   | 70075 RIKEN cDNA 2210401J11 gene                                                                                                      |
| 1440559_at   | 15365 high mobility group AT-hook 2, pseudogene 1                                                                                     |
| 1440573_at   | Transcribed locus                                                                                                                     |
| 1440815_x_at | 545039 similar to hypothetical protein LOC73415                                                                                       |
| 1440830_at   | 224792 G protein-coupled receptor 116                                                                                                 |
| 1440851_at   |                                                                                                                                       |
| 1440882_at   | 16975 low density lipoprotein receptor-related protein 8, apolipoprotein e receptor                                                   |
| 1440924_at   | 240641 M-phase phosphoprotein 1                                                                                                       |
| 1441030_at   | 75646 retinoic acid induced 14                                                                                                        |
| 1441124_at   | 215008 Expressed sequence AI854408                                                                                                    |
| 1441140_at   | 68703 RIKEN cDNA E230012J19 gene                                                                                                      |
| 1441155_at   | 72745 RIKEN cDNA 2810446P07 gene                                                                                                      |
| 1441211_at   | 16539 K+ voltage-gated channel, subfamily S, 2                                                                                        |
| 1441253_at   | 19726 Regulatory factor X, 3 (influences HLA class II expression)                                                                     |
| 1441491_at   | 414087 RIKEN cDNA A330068G13 gene                                                                                                     |
| 1441503_at   | 195208 doublecortin domain containing 2                                                                                               |
| 1441509_at   | 319949 RIKEN cDNA A130009I22 gene                                                                                                     |
| 1441549_at   | 78266 RIKEN cDNA 4931408L03 gene                                                                                                      |
| 1441580_at   | 433323 Sphingosine-1-phosphate phosphatase 2                                                                                          |
| 1441624_at   | 234214 RIKEN cDNA 9430041O17 gene                                                                                                     |
| 1441656_at   | 320622 RIKEN cDNA B930068K11 gene                                                                                                     |
| 1441738_at   |                                                                                                                                       |
| 1441823_at   | 328365 Retinoic acid induced 17                                                                                                       |
| 1441842_s_at | 69020 RIKEN cDNA 1500031N24 gene                                                                                                      |
| 1441880_x_at | 101883 hypothetical protein MGC30332                                                                                                  |
| 1442002_at   | 414107 RIKEN cDNA 7030402D04 gene                                                                                                     |
| 1442004_at   | 338364 tripartite motif-containing 65                                                                                                 |
| 1442018_at   | 103207 expressed sequence AI426953                                                                                                    |
| 1442265_at   | 14088 Fanconi anemia, complementation group C                                                                                         |
| 1442317_at   | 27041 Ras-GTPase-activating protein SH3-domain binding protein                                                                        |
| 1442404_at   | 17975 Nucleolin                                                                                                                       |
| 1442407_at   | Adult male urinary bladder cDNA, RIKEN full-length enriched library, clone:9530049K19<br>product:unclassifiable, full insert sequence |
| 1442421_at   |                                                                                                                                       |

|              |                                                                            |
|--------------|----------------------------------------------------------------------------|
| 1442426_at   | 218914 cDNA sequence BC037674                                              |
| 1442464_at   | 404590 expressed sequence AL117906                                         |
| 1442497_at   | 74355 SMC hinge domain containing 1                                        |
| 1442499_at   | 321022 carnitine deficiency-associated gene expressed in ventricle 3       |
| 1442502_at   | 380916 leucine-rich repeats and calponin homology (CH) domain containing 1 |
| 1442644_at   |                                                                            |
| 1442761_at   | 66314 Tumor protein D52-like 2                                             |
| 1442811_at   | 68799 RGM domain family, member B                                          |
| 1442819_at   | 545239 similar to rhomboid-related protein 2                               |
| 1442849_at   | 16971 low density lipoprotein receptor-related protein 1                   |
| 1442881_at   |                                                                            |
| 1442886_at   | 68965 RIKEN cDNA 1500010G04 gene                                           |
| 1442905_at   |                                                                            |
| 1443052_at   | 208111 RIKEN cDNA C330019L16 gene                                          |
| 1443099_at   | 432940 Similar to LOC90268 protein                                         |
| 1443157_at   |                                                                            |
| 1443196_at   |                                                                            |
| 1443491_at   | 19272 Protein tyrosine phosphatase, receptor type, K                       |
| 1443579_s_at | 97998 DEP domain containing 6                                              |
| 1443598_at   |                                                                            |
| 1443779_s_at | 212391 RIKEN cDNA A630025C20 gene                                          |
| 1443782_x_at | 77951 cytochrome P450, family 20, subfamily A, polypeptide 1               |
| 1443807_x_at | 12449 cyclin F                                                             |
| 1443863_at   | 319448 fibronectin type III domain containing 3a                           |
| 1444001_at   | 20744 Spermatid perinuclear RNA binding protein                            |
| 1444096_at   |                                                                            |
| 1444395_at   | 330938 DIX domain containing 1                                             |
| 1444409_at   | 380714 Rabphilin 3A-like (without C2 domains)                              |
| 1444450_at   | 242681 RIKEN cDNA 9530096D07 gene                                          |
| 1444451_at   | 23850 pappalysin 2                                                         |
| 1444566_at   | 69387 RIKEN cDNA 1700014P03 gene                                           |
| 1444638_at   | 22138 titin                                                                |
| 1444706_at   | 233235 Neuron navigator 2                                                  |
| 1444712_at   | PREDICTED: Mus musculus hypothetical LOC327992 (LOC327992), mRNA           |
| 1444716_at   | 52686 methyltransferase like 2                                             |
| 1444763_at   | 19272 protein tyrosine phosphatase, receptor type, K                       |
| 1444788_x_at | 12648 Chromodomain helicase DNA binding protein 1                          |
| 1445012_at   | 66595 RIKEN cDNA 1100001A21 gene                                           |
| 1445064_at   | Transcribed locus                                                          |
| 1445169_at   |                                                                            |
| 1445203_at   | 68070 PDZ domain containing 3                                              |
| 1445212_at   | 231713 RIKEN cDNA C330023M02 gene                                          |
| 1445226_at   | 407828 cDNA sequence BC023969                                              |
| 1445273_at   | 52658 DNA segment, Chr 10, ERATO Doi 638, expressed                        |
| 1445279_at   | 319196 Ankyrin repeat domain 5                                             |
| 1445411_at   |                                                                            |
| 1445438_at   | 114874 DDHD domain containing 1                                            |
| 1445452_at   | 22029 Tnf receptor-associated factor 1                                     |
| 1445456_at   | 74287 Potassium channel modulatory factor 1                                |
| 1445568_at   | 103844 Expressed sequence AI842396                                         |
| 1445724_at   | 29875 IQ motif containing GTPase activating protein 1                      |
| 1445758_at   |                                                                            |
| 1445837_at   | 226922 Potassium voltage-gated channel, subfamily Q, member 5              |
| 1445870_at   | 104252 CDC42 effector protein (Rho GTPase binding) 2                       |
| 1445882_at   | Transcribed locus                                                          |
| 1445933_at   |                                                                            |
| 1446001_at   |                                                                            |
| 1446506_at   | 245643 hypothetical protein B930041G04                                     |
| 1446540_at   | 67703 Kin of IRRE like 3 (Drosophila)                                      |
| 1446653_at   |                                                                            |
| 1446755_at   |                                                                            |
| 1446758_at   | 107976 brain and reproductive organ-expressed protein                      |

1446802\_at 544771 hypothetical protein LOC544771  
1446860\_at  
1446861\_at 75612 glucosamine (N-acetyl)-6-sulfatase  
1446951\_at  
1446985\_at PREDICTED: Mus musculus similar to ENSANGP00000016067 (LOC435347), mRNA  
1447046\_at 69387 RIKEN cDNA 1700014P03 gene  
1447087\_at Transcribed locus  
1447100\_s\_at 70617 RIKEN cDNA 5730508B09 gene  
1447205\_x\_at 20042 /// ribosomal protein S12 /// similar to ribosomal protein S12  
432865  
1447260\_at 14963 /// histocompatibility 2, blastocyst /// similar to MHC class I antigen precursor  
547349  
1447263\_at 56307 Methionine aminopeptidase 2  
1447310\_at 235386 RIKEN cDNA C630028N24 gene  
1447376\_at 17454 Moloney leukemia virus 10  
1447518\_at 72119 TPX2, microtubule-associated protein homolog (Xenopus laevis)  
1447532\_at 69399 RIKEN cDNA 2900042O04 gene  
1447593\_x\_at 14682 guanine nucleotide binding protein, alpha q polypeptide  
1447628\_x\_at  
1447678\_at 66065 Dehydrogenase/reductase (SDR family) member 10  
1447683\_x\_at 17299 methyltransferase-like 1  
1447708\_x\_at 207728 phosphodiesterase 2A, cGMP-stimulated  
1447724\_x\_at 403187 RIKEN cDNA D630048P19 gene  
1447790\_at Transcribed locus, weakly similar to XP\_417045.1 PREDICTED: similar to KIAA0853 protein  
[Gallus gallus]  
1447816\_x\_at 218885 cDNA sequence BC019806  
1447818\_x\_at 69159 Ras homolog enriched in brain like 1  
1447824\_x\_at 14828 heat shock 70kD protein 5 (glucose-regulated protein)  
1447830\_s\_at 19735 regulator of G-protein signaling 2  
1447899\_x\_at 17075 Tumor-associated calcium signal transducer 1  
1447928\_at 56078 carbonic anhydrase 5b, mitochondrial  
1447974\_s\_at 11831 aquaporin 6  
1449746\_s\_at 73690 GLI pathogenesis-related 1 (glioma)  
1449762\_at PREDICTED: Mus musculus similar to RIKEN cDNA 1700011M02 gene (LOC434826), mRNA  
1452841\_at 70974 phosphoglucomutase 2-like 1  
1452861\_at 72097 RIKEN cDNA 2010300C02 gene  
1452909\_at 76788 RIKEN cDNA 2410127E18 gene  
1452914\_at 70229 RIKEN cDNA 2410024N18 gene  
1452968\_at 68588 collagen triple helix repeat containing 1  
1453055\_at 214968 sema domain, transmembrane domain (TM), and cytoplasmic domain, (semaphorin) 6D  
1453056\_at 69309 solute carrier family 16 (monocarboxylic acid transporters), member 13  
1453230\_at 72723 zinc finger protein 74  
1453322\_at 74320 WD repeat domain 33  
1453356\_at 269061 RIKEN cDNA 5730453116 gene  
1453457\_at 73025 RIKEN cDNA 2900070H08 gene  
1453483\_at 71868 RIKEN cDNA 1700023E05 gene  
1453727\_at 66580 RIKEN cDNA 2610101J03 gene  
1453736\_s\_at 78521 RIKEN cDNA B230219D22 gene  
1453763\_at 106200 thioredoxin domain containing 11  
1453775\_at 78757 RIKEN cDNA 4921505C17 gene  
1453783\_at 70733 RIKEN cDNA 6330411E07 gene  
1453824\_at 229780 RIKEN cDNA A930028L21 gene  
1454195\_at 71226 RIKEN cDNA 4933433G19 gene  
1454250\_at 75914 SEC15-like 2 (S. cerevisiae)  
1454350\_at 380614 PDZ domain containing 6  
1454428\_at 75004 RIKEN cDNA 4930467D19 gene  
1454702\_at 269033 RIKEN cDNA 4930503L19 gene  
1454799\_at 231510 hypothetical protein 4933408F15  
1454889\_x\_at 319880 transmembrane and coiled coil domains 3  
1454976\_at Adult male urinary bladder cDNA, RIKEN full-length enriched library, clone:9530055M18  
product:unknown EST, full insert sequence  
1454990\_at 77044 AT rich interactive domain 2 (Arid-rfx like)

|              |                                                                                                                                  |
|--------------|----------------------------------------------------------------------------------------------------------------------------------|
| 1455037_at   | 18845 plexin A2                                                                                                                  |
| 1455121_at   | 212391 RIKEN cDNA A630025C20 gene                                                                                                |
| 1455221_at   | 11307 ATP-binding cassette, sub-family G (WHITE), member 1                                                                       |
| 1455260_at   | 209707 RIKEN cDNA A830039H10 gene                                                                                                |
| 1455266_at   | 16574 kinesin family member 5C                                                                                                   |
| 1455273_at   | 241322 zinc finger protein 482                                                                                                   |
| 1455275_at   |                                                                                                                                  |
| 1455321_at   | 114874 DDHD domain containing 1                                                                                                  |
| 1455336_at   | 66816 RIKEN cDNA 9030625G08 gene                                                                                                 |
| 1455342_at   | 353211 RIKEN cDNA A230083H22 gene                                                                                                |
| 1455400_at   | 69219 dimethylarginine dimethylaminohydrolase 1                                                                                  |
| 1455419_at   | 330286 RIKEN cDNA D630045J12 gene                                                                                                |
| 1455442_at   |                                                                                                                                  |
| 1455455_at   | 320302 RIKEN cDNA 4732486J07 gene                                                                                                |
| 1455627_at   | 12837 procollagen, type VIII, alpha 1                                                                                            |
| 1455648_at   | 210853 Hypothetical protein 6720451E15                                                                                           |
| 1455790_at   | 242705 E2F transcription factor 2                                                                                                |
| 1455945_at   | 238693 RIKEN cDNA A530094I17 gene                                                                                                |
| 1455971_at   | 72661 RIKEN cDNA 2810032E02 gene                                                                                                 |
| 1456008_at   | 72267 leucine rich repeat containing 8 family, member E                                                                          |
| 1456144_at   | 260315 neuron navigator 3                                                                                                        |
| 1456179_at   | 100287 expressed sequence AU019176                                                                                               |
| 1456201_at   | 68186 RIKEN cDNA 4632427E13 gene                                                                                                 |
| 1456272_at   | 72895 RIKEN cDNA 2900045N06 gene                                                                                                 |
| 1456346_at   | 13429 Dynamin 1                                                                                                                  |
| 1456359_at   | 238831 peptidylprolyl isomerase domain and WD repeat containing 1                                                                |
| 1456407_a_at | 228012 tousled-like kinase 1                                                                                                     |
| 1456422_at   |                                                                                                                                  |
| 1456475_s_at | 19088 protein kinase, cAMP dependent regulatory, type II beta                                                                    |
| 1456548_at   | 67154 Metadherin                                                                                                                 |
| 1456681_at   | 102944 Expressed sequence AI848149                                                                                               |
| 1456735_x_at | 235534 acid phosphatase-like 2                                                                                                   |
| 1456767_at   | 233067 leucine rich repeat and fibronectin type III domain containing 3                                                          |
| 1456854_at   | 18011 neuralized-like homolog (Drosophila)                                                                                       |
| 1456885_at   | 435258 Similar to cyclin I                                                                                                       |
| 1456917_at   | 211673 ADP-ribosylation factor guanine nucleotide-exchange factor 1(brefeldin A-inhibited)                                       |
| 1456952_at   | 239985 AT rich interactive domain 1B (Swi1 like)                                                                                 |
| 1457042_at   |                                                                                                                                  |
| 1457047_at   | Transcribed locus                                                                                                                |
| 1457063_at   | 237928 Phosphatase, orphan 1                                                                                                     |
| 1457083_at   | 68988 PRP31 pre-mRNA processing factor 31 homolog (yeast)                                                                        |
| 1457088_at   | Transcribed locus                                                                                                                |
| 1457161_at   | 399629 RIKEN cDNA 9530029O12 gene                                                                                                |
| 1457240_at   | Transcribed locus, moderately similar to XP_282988.2 PREDICTED: similar to novel protein [Mus musculus]                          |
| 1457392_at   | 218543 Splicing factor, arginine/serine-rich 12                                                                                  |
| 1457446_at   | 330908 opioid binding protein/cell adhesion molecule-like                                                                        |
| 1457459_at   | 103333 expressed sequence AU014973                                                                                               |
| 1457508_at   | 320358 RIKEN cDNA C430003N24 gene                                                                                                |
| 1457513_at   | 229707 RIKEN cDNA 6330569M22 gene                                                                                                |
| 1457517_at   | 320702 RIKEN cDNA A730046G19 gene                                                                                                |
| 1457539_at   | 52701 DNA segment, Chr 10, ERATO Doi 709, expressed                                                                              |
| 1457593_at   | 72493 RIKEN cDNA 2610202C22 gene                                                                                                 |
| 1457666_s_at | 26388 interferon activated gene 202B                                                                                             |
| 1457684_at   | 67326 RIKEN cDNA 1700037H04 gene                                                                                                 |
| 1457769_at   | 3 days neonate thymus cDNA, RIKEN full-length enriched library, clone:A630050A01<br>product:unclassifiable, full insert sequence |
| 1457824_at   | Transcribed locus                                                                                                                |
| 1457913_at   | 77519 RIKEN cDNA 5730601F06 gene                                                                                                 |
| 1457988_at   | 140740 SEC63-like (S. cerevisiae)                                                                                                |
| 1458038_at   | 73274 RIKEN cDNA 1700034P14 gene                                                                                                 |
| 1458056_at   | 218543 splicing factor, arginine/serine-rich 12                                                                                  |



|              |                                                                                                                                  |
|--------------|----------------------------------------------------------------------------------------------------------------------------------|
| 1458221_at   | 333639 RIKEN cDNA G630014P10 gene                                                                                                |
| 1458299_s_at | 18037 nuclear factor of kappa light polypeptide gene enhancer in B-cells inhibitor, epsilon                                      |
| 1458303_at   |                                                                                                                                  |
| 1458431_at   | 13690 RIKEN cDNA 1700012D14 gene                                                                                                 |
| 1458469_at   | 208650 Casitas B-lineage lymphoma b                                                                                              |
| 1458470_at   |                                                                                                                                  |
| 1458508_at   | 17184 matrin 3                                                                                                                   |
| 1458566_at   | 67769 G patch domain containing 2                                                                                                |
| 1458688_at   | 268970 expressed sequence AU044757                                                                                               |
| 1458739_at   | 268977 Latent transforming growth factor beta binding protein 1                                                                  |
| 1458807_at   | 269587 Erythrocyte protein band 4.1                                                                                              |
| 1459121_at   | 9 days embryo whole body cDNA, RIKEN full-length enriched library, clone:D030030M01<br>product:unknown EST, full insert sequence |
| 1459274_at   | Transcribed locus                                                                                                                |
| 1459300_at   | Transcribed locus                                                                                                                |
| 1459335_at   |                                                                                                                                  |
| 1459457_at   | 108058 calcium/calmodulin-dependent protein kinase II, delta                                                                     |
| 1459466_at   |                                                                                                                                  |
| 1459573_at   | 70285 RIKEN cDNA 2310066N05 gene                                                                                                 |
| 1459648_at   | 105835 RIKEN cDNA F730002C09 gene                                                                                                |
| 1459713_s_at | 101772 transmembrane protein 16A                                                                                                 |
| 1459720_x_at | 66131 Timeless interacting protein                                                                                               |
| 1459740_s_at | 22228 uncoupling protein 2 (mitochondrial, proton carrier)                                                                       |
| 1459741_x_at | 22228 uncoupling protein 2 (mitochondrial, proton carrier)                                                                       |
| 1459757_x_at | Transcribed locus                                                                                                                |
| 1459896_at   | 71592 pogo transposable element with KRAB domain                                                                                 |
| 1459979_x_at | 24135 zinc finger protein 68                                                                                                     |
| 1460011_at   | 232174 cytochrome P450, family 26, subfamily b, polypeptide 1                                                                    |
| 1460012_at   | 71856 WAP four-disulfide core domain 3                                                                                           |
| 1460035_at   | 12034 B-cell receptor-associated protein 37                                                                                      |
| 1460063_at   | 52409 DNA segment, Chr 5, ERATO Doi 798, expressed                                                                               |
| 1460102_at   | 76707 CLIP associating protein 1                                                                                                 |
| 1460110_at   | 246102 rotatin                                                                                                                   |
| 1460468_s_at | 72778 RIKEN cDNA 2810451A06 gene                                                                                                 |
| 1460632_at   | 98711 retinol dehydrogenase 10 (all-trans)                                                                                       |
