# Supplementary material
Source: PubMed Central journal article supplement (PMC2393758)
Supplement: pnas_0800668105_10.pdf [file pnas_0800668105_10.pdf]

**Table 5. IPA-identified canonical signaling and metabolic pathways significantly enriched among transcripts present in mGEPs but not npGECs**

| Canonical Pathway                                   | p-value* | Gene symbols                                                                                                                                      |
|-----------------------------------------------------|----------|---------------------------------------------------------------------------------------------------------------------------------------------------|
| PPAR $\alpha$ /RXR $\alpha$ Activation              | 1.27E-05 | MAP3K14, ADCY2, NFKBIE (includes EG:4794), SMAD3, GNAQ, MAPK8, CAND1, GNAS, IKBKG, PRKAR2B, CYP2C18, PRKAR1B, SLC27A1, TGS1, PPARGC1A             |
| B Cell Receptor Signaling                           | 2.29E-05 | BLNK, ETS1, MAP3K14, GAB2, PIK3C2A, NFKBIE (includes EG:4794), MAP3K11, MAPK8, PIK3R5, NFATC1, BCL6, IKBKG, CAMK2D, SYK, LYN                      |
| PPAR Signaling                                      | 3.17E-05 | PPARG, NR2F1, MAP3K14, IKBKG, IL1RN, NFKBIE (includes EG:4794), PDGFRA, PDGFC, PDGFB, MAP3K7IP1, PPARGC1A                                         |
| NF- $\kappa$ B Signaling                            | 6.13E-04 | MAP3K14, IKBKG, PIK3C2A, IL1RN, NFKBIE (includes EG:4794), PIK3R5, PDGFRA, TGFA, MAPK8, TNFAIP3, IRAK3, MAP3K7IP1                                 |
| Actin Cytoskeleton Signaling                        | 6.76E-04 | ARHGEF4, PIK3C2A, PIK3R5, FGFR2, PIP5K1B, IQGAP1 (includes EG:8826), RAC3, PDGFC, TTN, APC, PDGFB, FGF1, MYLK, ROCK1, PAK1, PDGFRA, FGF7          |
| IL-10 Signaling                                     | 7.30E-04 | MAP3K14, IKBKG, SP1, IL1RN, NFKBIE (includes EG:4794), MAPK8, BLVRB, MAP3K7IP1                                                                    |
| G-Protein Coupled Receptor Signaling                | 1.85E-03 | PDE2A, ADCY2, RGS2, PIK3C2A, EDNRB, NFKBIE (includes EG:4794), GNAQ, PIK3R5, GNAS, IKBKG, PRKAR2B, CAMK2D, PRKAR1B, PDK1                          |
| ERK/MAPK Signaling                                  | 1.93E-03 | ETS1, PPARG, PIK3C2A, PIK3R5, FGFR2, RAC3, PAK1, PRKAR2B, PLA2G4B, PLA2G5, PPM1L, PDGFRA, PRKAR1B, ELK3                                           |
| Fc Epsilon RI Signaling                             | 2.23E-03 | PIK3C2A, SYK, PLA2G5, PLA2G4B, PIK3R5, MAPK8, LYN, PDK1, RAC3                                                                                     |
| Aryl Hydrocarbon Receptor Signaling                 | 2.32E-03 | NR2F1, NCOA2, SP1, MGST2, GSTM5, GSTA5, MAPK8, APAF1, ALDH3B1, CDKN1B, ALDH3A1                                                                    |
| Ephrin Receptor Signaling                           | 3.68E-03 | MAP3K14, GNAQ, FGFR2, GNAZ, PDGFC, RAC3, PDGFB, FGF1, GNG10, ROCK1, GNAS, PAK1, PDGFRA                                                            |
| SAPK/JNK Signaling                                  | 3.74E-03 | PIK3C2A, MAP3K11, PIK3R5, PDGFRA, MAPK8, FGFR2, NFATC1, MAP4K5, RAC3, MAP3K7IP1                                                                   |
| Toll-like Receptor Signaling                        | 4.06E-03 | MAP3K14, IKBKG, MAP3K11, MAPK8, IRAK3, MAP3K7IP1                                                                                                  |
| Nitric Oxide Signaling in the Cardiovascular System | 5.40E-03 | PDE2A, ADCY2, CACNA1D, PRKAR2B, PIK3C2A, PIK3R5, PRKAR1B, PRKG2                                                                                   |
| PDGF Signaling                                      | 5.41E-03 | PIK3C2A, MAP3K11, PIK3R5, PDGFRA, MAPK8, PDGFC, PDGFB                                                                                             |
| Synaptic Long Term Depression                       | 7.04E-03 | NOS1, GNAS, CACNA1D, PLA2R1, PLA2G5, PPM1L, LYN, GNAQ, PRKG2, GNAZ                                                                                |
| Axonal Guidance Signaling                           | 8.38E-03 | PIK3C2A, GNAQ, PIK3R5, FGFR2, NFATC1, PLXNA2, GNAZ, RAC3, PDGFC, PDGFB, GNG10, ROCK1, GNAS, PAK1, PRKAR2B, NTRK3, SEMA6D, ABLIM3, PDGFRA, PRKAR1B |
| Eicosanoid Signaling                                | 8.76E-03 | PTGDR, PTGER3, PLA2R1, PLA2G5, PTGS2, PTGER4                                                                                                      |
| LPS/IL-1 Mediated Inhibition of RXR Function        | 9.58E-03 | ABCB1, MGST2, GSTM5, NR1H4, GSTA5, MAP3K11, MAPK8, ALDH3B1, SLC27A1, ABCG1, ALDH3A1                                                               |
| FGF Signaling                                       | 1.07E-02 | PIK3C2A, MAP3K11, PIK3R5, MAPK8, FGFR2, FGF7, FGF1                                                                                                |
| PTEN Signaling                                      | 1.16E-02 | IKBK, MAGI1, PIK3R5, PDGFRA, CDKN1B, PDK1, RAC3, MAGI3                                                                                            |
| IGF-1 Signaling                                     | 1.36E-02 | PRKAR2B, NOV, PIK3C2A, PIK3R5, PRKAR1B, MAPK8, PDK1                                                                                               |
| Apoptosis Signaling                                 | 1.36E-02 | ROCK1, MAP3K14, IKBKG, NFKBIE (includes EG:4794), PDGFRA, MAPK8, APAF1, FGFR2                                                                     |
| Xenobiotic Metabolism Signaling                     | 1.38E-02 | ABCB1, GSTM5, PIK3C2A, MAP3K11, GSTA5, MAPK8, PIK3R5, CAMK2D, MGST2, PPM1L, ALDH3B1, ALDH3A1, PPARGC1A                                            |
| Endoplasmic Reticulum Stress Pathway                | 1.41E-02 | ERN1 (includes EG:2081), MAPK8, HSPA5                                                                                                             |
| NRF2-mediated Oxidative Stress Response             | 1.50E-02 | SOD2, PIK3C2A, MGST2, GSTM5, GSTA5, MAP3K11, PIK3R5, MAPK8, FOSL1                                                                                 |
| IL-6 Signaling                                      | 1.61E-02 | ABCB1, MAP3K14, IKBKG, IL1RN, NFKBIE (includes EG:4794), MAPK8, MAP3K7IP1                                                                         |
| Integrin Signaling                                  | 1.84E-02 | MYLK, ROCK1, PARVB, PAK1, PIK3C2A, ARF4, PIK3R5, PDGFRA, MAPK8, FGFR2, RAC3, TTN                                                                  |
| Death Receptor Signaling                            | 2.91E-02 | MAP3K14, IKBKG, NFKBIE (includes EG:4794), MAPK8, APAF1                                                                                           |
| GM-CSF Signaling                                    | 2.91E-02 | ETS1, CAMK2D, PIK3C2A, PIK3R5, LYN                                                                                                                |
| Cardiac $\beta$ -adrenergic Signaling               | 3.20E-02 | GNAS, PDE2A, ADCY2, CACNA1D, PRKAR2B, PPM1L, PRKAR1B, GNG10                                                                                       |
| Neuregulin Signaling                                | 3.97E-02 | ERBB2IP, BTC, TGFA, CDKN1B, PDK1, AREG                                                                                                            |
| Wnt/ $\beta$ -catenin Signaling                     | 4.11E-02 | SOX2, CDH2, SOX9, PPM1L, GNAQ, LRP1, TCF7L2, APC, MAP3K7IP1                                                                                       |
| EGF Signaling                                       | 4.60E-02 | PIK3C2A, MAP3K11, PIK3R5, MAPK8                                                                                                                   |
| PI3K/AKT Signaling                                  | 4.83E-02 | GAB2, IKBKG, NFKBIE (includes EG:4794), PPM1L, PDGFRA, FGFR2, CDKN1B, PDK1                                                                        |

\* these p-values were <0.05 in a right-tailed Fisher's Exact Test.
