# Supplementary material
Source: PubMed Central journal article supplement (PMC2393758)
Supplement: pnas_0800668105_11.pdf [file pnas_0800668105_11.pdf]

Table 6. Differentially expressed mGEP transcripts after a 24h infection with the ChAG-associated Kx1 isolate.

| Upregulated transcripts |         |                                                                                       |                                          |
|-------------------------|---------|---------------------------------------------------------------------------------------|------------------------------------------|
| Affymetrix probe set ID | Gene ID | Gene description                                                                      | Fold change compared to uninfected mGEPs |
| 1427429_at              | 12981   | colony stimulating factor 2 (granulocyte-macrophage)                                  | 2266.3                                   |
| 1422029_at              | 20297   | chemokine (C-C motif) ligand 20                                                       | 637.6                                    |
| 1421228_at              | 20306   | chemokine (C-C motif) ligand 7                                                        | 209.3                                    |
| 1449984_at              | 20310   | chemokine (C-X-C motif) ligand 2                                                      | 196.3                                    |
| 1419728_at              | 20311   | chemokine (C-X-C motif) ligand 5                                                      | 96.2                                     |
| 1427747_a_at            | 16819   | lipocalin 2                                                                           | 92.0                                     |
| 1434015_at              | 227659  | solute carrier family 2 (facilitated glucose transporter), member 6                   | 86.5                                     |
| 1420515_a_at            | 57757   | peptidoglycan recognition protein 2                                                   | 81.0                                     |
| 1460722_at              | 223920  | sterol O-acyltransferase 2                                                            | 78.7                                     |
| 1449591_at              | 12363   | caspase 11, apoptosis-related cysteine protease                                       | 70.0                                     |
| 1420380_at              | 20296   | chemokine (C-C motif) ligand 2                                                        | 63.2                                     |
| 1450826_a_at            | 20210   | serum amyloid A 3                                                                     | 51.0                                     |
| 1419149_at              | 18787   | serine (or cysteine) proteinase inhibitor, clade E, member 1                          | 49.1                                     |
| 1441150_x_at            |         | Transcribed locus                                                                     | 43.2                                     |
| 1427381_at              | 16365   | immunoresponse gene 1                                                                 | 39.5                                     |
| 1421682_a_at            | 21647   | t-complex-associated testis expressed 3                                               | 37.1                                     |
| 1423954_at              | 12266   | complement component 3                                                                | 35.3                                     |
| 1418930_at              | 15945   | chemokine (C-X-C motif) ligand 10                                                     | 34.5                                     |
| 1419209_at              | 14825   | chemokine (C-X-C motif) ligand 1                                                      | 34.4                                     |
| 1445381_at              |         |                                                                                       | 34.2                                     |
| 1433963_a_at            | 108101  | cDNA sequence BC032204                                                                | 32.2                                     |
| 1420197_at              | 17873   | Growth arrest and DNA-damage-inducible 45 beta                                        | 30.1                                     |
| 1423172_at              | 17957   | N-ethylmaleimide sensitive fusion protein attachment protein beta                     | 29.8                                     |
| 1450582_at              | 15016   | histocompatibility 2, Q region locus 5                                                | 29.6                                     |
| 1440207_at              | 99010   | expressed sequence AI505034                                                           | 29.5                                     |
| 1453851_a_at            | 23882   | growth arrest and DNA-damage-inducible 45 gamma                                       | 29.0                                     |
| 1417813_at              | 56489   | inhibitor of kappaB kinase epsilon                                                    | 28.6                                     |
| 1418126_at              | 20304   | chemokine (C-C motif) ligand 5                                                        | 28.4                                     |
| 1427372_at              | 13115   | cytochrome P450, family 27, subfamily b, polypeptide 1                                | 27.3                                     |
| 1450297_at              | 16193   | interleukin 6                                                                         | 27.2                                     |
| 1424735_at              | 227731  | solute carrier family 25 (mitochondrial carrier, phosphate carrier), member 25        | 25.8                                     |
| 1450199_a_at            | 192187  | stabilin 1                                                                            | 25.7                                     |
| 1419529_at              | 83430   | interleukin 23, alpha subunit p19                                                     | 24.5                                     |
| 1418829_a_at            | 13807   | enolase 2, gamma neuronal                                                             | 24.1                                     |
| 1419665_a_at            | 56312   | nuclear protein 1                                                                     | 23.2                                     |
| 1419853_a_at            |         |                                                                                       | 23.1                                     |
| 1419697_at              | 56066   | chemokine (C-X-C motif) ligand 11                                                     | 23.0                                     |
| 1420057_at              | 107817  | Phosphatidylserine receptor                                                           | 22.8                                     |
| 1460251_at              | 14102   | Fas (TNF receptor superfamily member)                                                 | 22.5                                     |
| 1455197_at              | 223881  | Rho family GTPase 1                                                                   | 22.1                                     |
| 1448485_at              | 14598   | gamma-glutamyltransferase 1                                                           | 20.2                                     |
| 1442856_at              | 223780  | adrenomedullin 2                                                                      | 20.0                                     |
| 1417516_at              | 13198   | DNA-damage inducible transcript 3                                                     | 19.9                                     |
| 1419241_a_at            | 11634   | autoimmune regulator (autoimmune polyendocrinopathy candidiasis ectodermal dystrophy) | 19.2                                     |
| 1427410_at              | 328425  | deleted in lymphocytic leukemia, 2                                                    | 18.9                                     |
| 1426464_at              | 217166  | nuclear receptor subfamily 1, group D, member 1                                       | 18.6                                     |
| 1428864_at              | 71434   | RIKEN cDNA 5530400B01 gene                                                            | 18.2                                     |
| 1452418_at              | 319202  | RIKEN cDNA 1200016E24 gene                                                            | 17.9                                     |
| 1457135_at              | 245827  | fat tumor suppressor homolog 2 (Drosophila)                                           | 17.7                                     |
| 1425154_a_at            | 12977   | colony stimulating factor 1 (macrophage)                                              | 17.3                                     |
| 1435462_at              | 433022  | hypothetical LOC433022                                                                | 17.2                                     |
| 1438707_at              | 224079  | ATPase type 13A4                                                                      | 17.2                                     |
| 1415989_at              | 22329   | vascular cell adhesion molecule 1                                                     | 17.0                                     |
| 1439837_at              | 227331  | trinucleotide repeat containing 15                                                    | 16.9                                     |
| 1450829_at              | 21929   | tumor necrosis factor, alpha-induced protein 3                                        | 16.4                                     |
| 1434774_at              | 217344  | rhomboid, veinlet-like 6 (Drosophila)                                                 | 15.6                                     |
| 1439787_at              |         |                                                                                       | 15.4                                     |
| 1434582_at              | 238988  | DNA segment, Chr 14, ERATO Doi 171, expressed                                         | 15.3                                     |
| 1419647_a_at            | 15937   | immediate early response 3                                                            | 15.2                                     |
| 1418936_at              | 17133   | v-maf musculoaponeurotic fibrosarcoma oncogene family, protein F (avian)              | 15.2                                     |
| 1416432_at              | 170768  | 6-phosphofructo-2-kinase/fructose-2,6-biphosphatase 3                                 | 15.1                                     |
| 1420958_at              |         |                                                                                       | 15.0                                     |
| 1421392_a_at            | 11796   | baculoviral IAP repeat-containing 3                                                   | 15.0                                     |
| 1432466_a_at            | 11816   | apolipoprotein E                                                                      | 14.1                                     |
| 1433694_at              | 18576   | phosphodiesterase 3B, cGMP-inhibited                                                  | 14.1                                     |
| 1417936_at              | 20308   | chemokine (C-C motif) ligand 9                                                        | 14.1                                     |

|              |                                                                                          |      |
|--------------|------------------------------------------------------------------------------------------|------|
| 1417856_at   | 19698 avian reticuloendotheliosis viral (v-rel) oncogene related B                       | 13.8 |
| 1418133_at   | 12051 B-cell leukemia/lymphoma 3                                                         | 13.4 |
| 1449731_s_at |                                                                                          | 13.3 |
| 1417262_at   | 19225 prostaglandin-endoperoxide synthase 2                                              | 13.1 |
| 1431188_a_at | 21968 /// target of myb1 homolog (chicken) /// similar to TOM1<br>545878                 | 13.1 |
| 1424785_at   | 70726 angiopoietin-like 6                                                                | 12.8 |
| 1450264_a_at | 12660 choline kinase alpha                                                               | 12.8 |
| 1419675_at   | 18049 nerve growth factor, beta                                                          | 12.4 |
| 1448886_at   | 14462 GATA binding protein 3                                                             | 12.4 |
| 1450430_at   | 17533 mannose receptor, C type 1                                                         | 11.9 |
| 1421992_a_at | 16010 insulin-like growth factor binding protein 4                                       | 11.8 |
| 1422612_at   | 15277 hexokinase 2                                                                       | 11.5 |
| 1426063_a_at | 14579 GTP binding protein (gene overexpressed in skeletal muscle)                        | 11.5 |
| 1449519_at   | 13197 growth arrest and DNA-damage-inducible 45 alpha                                    | 11.3 |
| 1424959_at   | 69787 annexin A13                                                                        | 11.1 |
| 1422033_a_at | 12803 ciliary neurotrophic factor                                                        | 11.0 |
| 1448026_at   | 320790 Chromodomain helicase DNA binding protein 7                                       | 11.0 |
| 1416690_at   | 56055 GTP binding protein 2                                                              | 10.9 |
| 1420760_s_at | 17990 N-myc downstream regulated-like                                                    | 10.9 |
| 1418536_at   | 386462 similar to MHC Q8/9d surface antigen                                              | 10.8 |
| 1422573_at   | 11717 AMP deaminase 3                                                                    | 10.4 |
| 1436555_at   | 101999 expressed sequence AI158848                                                       | 10.4 |
| 1423602_at   | 22029 Tnf receptor-associated factor 1                                                   | 10.4 |
| 1451593_at   | 15006 Histocompatibility 2, D region locus 1                                             | 10.3 |
| 1450630_at   | 60507 queuine tRNA-ribosyltransferase 1                                                  | 10.3 |
| 1417812_a_at | 16780 laminin, beta 3                                                                    | 10.3 |
| 1455965_at   |                                                                                          | 10.1 |
| 1417483_at   | 80859 nuclear factor of kappa light polypeptide gene enhancer in B-cells inhibitor, zeta | 10.0 |
| 1448657_a_at | 56812 DnaJ (Hsp40) homolog, subfamily B, member 10                                       | 10.0 |
| 1449363_at   | 11910 activating transcription factor 3                                                  | 9.9  |
| 1455010_at   | 68949 RIKEN cDNA 1500012F01 gene                                                         | 9.7  |
| 1422648_at   | 11988 solute carrier family 7 (cationic amino acid transporter, y+ system), member 2     | 9.7  |
| 1435540_at   | 210146 immunity-related GTPase family, Q1                                                | 9.5  |
| 1426027_a_at | 78514 Rho GTPase activating protein 10                                                   | 9.5  |
| 1428365_a_at | 74142 protease, serine, 15                                                               | 9.4  |
| 1426065_a_at | 228775 tribbles homolog 3 (Drosophila)                                                   | 9.3  |
| 1421756_a_at | 14760 G protein-coupled receptor 19                                                      | 9.3  |
| 1439071_at   | 71426 RIKEN cDNA 5430416N02 gene                                                         | 9.2  |
| 1436040_at   | 69471 RIKEN cDNA 2310005L22 gene                                                         | 9.1  |
| 1451338_at   | 64652 nischarin                                                                          | 9.0  |
| 1426526_s_at | 12659 oviductal glycoprotein 1                                                           | 8.8  |
| 1437100_x_at | 223775 proviral integration site 3                                                       | 8.7  |
| 1428279_a_at | 72174 ataxin 7-like 4                                                                    | 8.7  |
| 1423848_at   | 68533 M phase phosphoprotein 6                                                           | 8.6  |
| 1428691_at   | 71437 RIKEN cDNA 5630401D06 gene                                                         | 8.6  |
| 1423413_at   | 17988 N-myc downstream regulated gene 1                                                  | 8.5  |
| 1452416_at   | 16194 interleukin 6 receptor, alpha                                                      | 8.4  |
| 1434574_at   | 68108 RIKEN cDNA 9430008C03 gene                                                         | 8.4  |
| 1425837_a_at | 12457 CCR4 carbon catabolite repression 4-like (S. cerevisiae)                           | 8.4  |
| 1416920_at   | 19653 RNA binding motif protein 4                                                        | 8.3  |
| 1435680_a_at | 83768 dipeptidylpeptidase 7                                                              | 8.3  |
| 1424940_s_at | 217887 cDNA sequence BC022687                                                            | 8.3  |
| 1428306_at   | 74747 DNA-damage-inducible transcript 4                                                  | 8.2  |
| 1424490_at   | 232969 RIKEN cDNA 2410005H09 gene                                                        | 8.2  |
| 1419105_at   | 20186 nuclear receptor subfamily 1, group H, member 4                                    | 8.2  |
| 1423903_at   | 52118 poliovirus receptor                                                                | 8.2  |
| 1448436_a_at | 16362 interferon regulatory factor 1                                                     | 8.2  |
| 1440143_at   | 239827 RIKEN cDNA F630022B06 gene                                                        | 8.2  |
| 1452684_at   | 67605 AKT1 substrate 1 (proline-rich)                                                    | 8.2  |
| 1420382_at   | 171504 apolipoprotein B48 receptor                                                       | 8.1  |
| 1438148_at   | 330122 gene model 1960, (NCBI)                                                           | 8.1  |
| 1448855_at   | 56289 Ras association (RalGDS/AF-6) domain family 1                                      | 8.1  |
| 1417408_at   | 14066 coagulation factor III                                                             | 8.1  |
| 1415899_at   | 16477 Jun-B oncogene                                                                     | 8.0  |
| 1427348_at   | 230738 zinc finger CCCH type containing 12A                                              | 8.0  |
| 1436212_at   | 213068 expressed sequence AI661017                                                       | 8.0  |
| 1435108_at   | 239027 Rho GTPase activating protein 22                                                  | 7.9  |
| 1424067_at   | 15894 intercellular adhesion molecule                                                    | 7.9  |
| 1441836_x_at | 74174 RIKEN cDNA 1700006H03 gene                                                         | 7.9  |
| 1453429_at   | 78672 RIKEN cDNA 9530057J20 gene                                                         | 7.9  |
| 1432088_at   | 72789 ventricular zone expressed PH domain homolog 1 (zebrafish)                         | 7.9  |

|              |                                                                                                     |     |
|--------------|-----------------------------------------------------------------------------------------------------|-----|
| 1433453_a_at | 99382 expressed sequence AW539457                                                                   | 7.8 |
| 1448377_at   | 20568 secretory leukocyte protease inhibitor                                                        | 7.8 |
| 1452198_at   | 30841 F-box and leucine-rich repeat protein 10                                                      | 7.8 |
| 1425519_a_at | 16149 Ia-associated invariant chain                                                                 | 7.7 |
| 1419061_at   | 11854 ras homolog gene family, member D                                                             | 7.5 |
| 1443883_at   | 66460 RIKEN cDNA 2610042O14 gene                                                                    | 7.5 |
| 1419203_at   | 24082 gene trap locus F3a                                                                           | 7.5 |
| 1451382_at   | 69065 RIKEN cDNA 1810008K03 gene                                                                    | 7.4 |
| 1432059_x_at | 75977 RIKEN cDNA 5031425E22 gene                                                                    | 7.4 |
| 1425030_at   | 52521 zinc finger protein 622                                                                       | 7.4 |
| 1431035_at   | 208846 dishevelled associated activator of morphogenesis 1                                          | 7.4 |
| 1419682_a_at | 381406 /// TP53 regulating kinase /// similar to mNori-2p<br>76367                                  | 7.4 |
| 1448239_at   | 15368 heme oxygenase (decycling) 1                                                                  | 7.3 |
| 1448325_at   | 17872 myeloid differentiation primary response gene 116                                             | 7.3 |
| 1422470_at   | 12176 BCL2/adenovirus E1B 19kDa-interacting protein 1, NIP3                                         | 7.3 |
| 1420450_at   | 17384 matrix metalloproteinase 10                                                                   | 7.2 |
| 1420710_at   | 19696 reticuloendotheliosis oncogene                                                                | 7.1 |
| 1421001_a_at | 12353 carbonic anhydrase 6                                                                          | 7.1 |
| 1432001_at   | 74843 zinc finger, MYND domain containing 17                                                        | 7.1 |
| 1416769_s_at | 114143 ATPase, H+ transporting, V0 subunit B                                                        | 7.1 |
| 1435470_at   |                                                                                                     | 7.1 |
| 1416273_at   | 21928 tumor necrosis factor, alpha-induced protein 2                                                | 7.0 |
| 1420088_at   |                                                                                                     | 7.0 |
| 1418465_at   | 17972 neutrophil cytosolic factor 4                                                                 | 6.9 |
| 1425927_a_at | 107503 activating transcription factor 5                                                            | 6.9 |
| 1418571_at   | 27279 tumor necrosis factor receptor superfamily, member 12a                                        | 6.8 |
| 1417487_at   | 14283 fos-like antigen 1                                                                            | 6.8 |
| 1426810_at   | 104263 jumonji domain containing 1A                                                                 | 6.8 |
| 1424942_a_at | 17869 myelocytomatosis oncogene                                                                     | 6.8 |
| 1455148_at   | 243339 hypothetical protein C130036G08                                                              | 6.7 |
| 1418422_at   | 93806 serine (or cysteine) proteinase inhibitor, clade B, member 9g                                 | 6.7 |
| 1452595_at   | 240913 a disintegrin-like and metalloprotease (repolysin type) with thrombospondin type 1 motif, 4  | 6.7 |
| 1451233_at   | 22030 Tnf receptor-associated factor 2                                                              | 6.6 |
| 1420089_at   | 18035 Nuclear factor of kappa light chain gene enhancer in B-cells inhibitor, alpha                 | 6.6 |
| 1419516_at   | 108160 DNA segment, human DXS9928E                                                                  | 6.6 |
| 1449473_s_at | 21939 tumor necrosis factor receptor superfamily, member 5                                          | 6.6 |
| 1431965_at   | 71067 RIKEN cDNA 4933411E08 gene                                                                    | 6.6 |
| 1429005_at   | 52065 malignant fibrous histiocytoma amplified sequence 1                                           | 6.4 |
| 1419029_at   | 50527 ERO1-like (S. cerevisiae)                                                                     | 6.4 |
| 1425412_at   | 216799 cold autoinflammatory syndrome 1 homolog (human)                                             | 6.4 |
| 1422705_at   | 65112 transmembrane, prostate androgen induced RNA                                                  | 6.3 |
| 1449396_at   | 11754 amine oxidase, copper containing 3                                                            | 6.3 |
| 1441935_at   | 68558 ankyrin repeat, family A (RFXANK-like), 2                                                     | 6.2 |
| 1426452_a_at | 75985 RAB30, member RAS oncogene family                                                             | 6.2 |
| 1429907_at   | 73545 RIKEN cDNA 1700094D03 gene                                                                    | 6.1 |
| 1429726_at   | 66859 solute carrier family 16 (monocarboxylic acid transporters), member 9                         | 6.1 |
| 1434372_at   |                                                                                                     | 6.1 |
| 1426243_at   | 107869 cystathionase (cystathionine gamma-lyase)                                                    | 6.1 |
| 1418901_at   | 12608 CCAAT/enhancer binding protein (C/EBP), beta                                                  | 6.1 |
| 1435062_at   | 68955 RIKEN cDNA 1500001A10 gene                                                                    | 6.0 |
| 1455666_at   | 218314 RIKEN cDNA A230042K10 gene                                                                   | 6.0 |
| 1421265_a_at | 56190 RNA-binding region (RNP1, RRM) containing 1                                                   | 6.0 |
| 1425681_a_at | 26434 prion protein dublet                                                                          | 6.0 |
| 1448385_at   | 100561 solute carrier family 15, member 4                                                           | 6.0 |
| 1427689_a_at | 57783 TNFAIP3 interacting protein 1                                                                 | 6.0 |
| 1420113_s_at | 66423 RIKEN cDNA 2410022L05 gene                                                                    | 6.0 |
| 1444086_at   | 210356 RIKEN cDNA E030049G20 gene                                                                   | 6.0 |
| 1447494_at   | 52819 DNA segment, Chr 7, Brigham & Women's Genetics 0826 expressed                                 | 5.9 |
| 1421042_at   | 16800 rho/rac guanine nucleotide exchange factor (GEF) 2                                            | 5.9 |
| 1427987_at   | 224902 scaffold attachment factor B2                                                                | 5.9 |
| 1426726_at   | 52040 /// protein phosphatase 1, regulatory subunit 10 /// hypothetical protein LOC545202<br>545202 | 5.9 |
| 1436526_at   | 214505 N-acetylglucosamine-1-phosphotransferase, gamma subunit                                      | 5.9 |
| 1440346_at   | 216850 Hypothetical LOC74273                                                                        | 5.9 |
| 1421267_a_at | 17684 Cbp/p300-interacting transactivator, with Glu/Asp-rich carboxy-terminal domain, 2             | 5.9 |
| 1427334_s_at | 67246 RIKEN cDNA 2810474O19 gene                                                                    | 5.8 |
| 1433798_a_at | 105418 RIKEN cDNA E330034G19 gene                                                                   | 5.8 |
| 1424382_at   | 52377 reticulocalbin 3, EF-hand calcium binding domain                                              | 5.8 |
| 1436424_at   | 72012 RIKEN cDNA 1600020E01 gene                                                                    | 5.8 |
| 1453721_a_at | 20530 solute carrier family 31, member 2                                                            | 5.8 |
| 1422838_at   | 16532 potassium large conductance pH-sensitive channel, subfamily M, alpha member 3                 | 5.7 |

|              |                                                                                                       |     |
|--------------|-------------------------------------------------------------------------------------------------------|-----|
| 1416224_at   | 22642 zinc finger and BTB domain containing 17                                                        | 5.7 |
| 1425614_x_at | 14964 histocompatibility 2, D region locus 1                                                          | 5.7 |
| 1435432_at   | 347722 centaurin, gamma 2                                                                             | 5.7 |
| 1435955_at   | 243958 sialic acid binding Ig-like lectin 10                                                          | 5.7 |
| 1444302_at   | 232313 cDNA sequence BC049816                                                                         | 5.7 |
| 1435976_at   |                                                                                                       | 5.7 |
| 1426990_at   | 65969 cubilin (intrinsic factor-cobalamin receptor)                                                   | 5.6 |
| 1434210_s_at | 16206 leucine-rich repeats and immunoglobulin-like domains 1                                          | 5.6 |
| 1449603_at   | 103795 expressed sequence AI594671                                                                    | 5.6 |
| 1427047_at   | 227699 nucleoporin 188                                                                                | 5.6 |
| 1429445_at   | 70894 RIKEN cDNA 4921510J17 gene                                                                      | 5.6 |
| 1436562_at   | 230073 DEAD (Asp-Glu-Ala-Asp) box polypeptide 58                                                      | 5.6 |
| 1424489_a_at | 66966 tRNA isopentenyltransferase 1                                                                   | 5.6 |
| 1417713_at   | 67204 eukaryotic translation initiation factor 2, subunit 2 (beta)                                    | 5.6 |
| 1437362_at   | 229780 RIKEN cDNA A930028L21 gene                                                                     | 5.6 |
| 1448593_at   | 22402 WNT1 inducible signaling pathway protein 1                                                      | 5.6 |
| 1418932_at   | 18030 nuclear factor, interleukin 3, regulated                                                        | 5.6 |
| 1429040_at   | 381598 RIKEN cDNA 2610005L07 gene                                                                     | 5.5 |
| 1441263_a_at | 68161 RIKEN cDNA A930005H10 gene                                                                      | 5.5 |
| 1425902_a_at | 18034 nuclear factor of kappa light polypeptide gene enhancer in B-cells 2, p49/p100                  | 5.5 |
| 1418025_at   | 20893 basic helix-loop-helix domain containing, class B2                                              | 5.5 |
| 1422035_at   | 20707 serine (or cysteine) proteinase inhibitor, clade B, member 9c                                   | 5.5 |
| 1416458_at   | 11841 ADP-ribosylation factor 2                                                                       | 5.4 |
| 1428492_at   | 384009 GLI pathogenesis-related 2                                                                     | 5.4 |
| 1422493_at   | 12892 coproporphyrinogen oxidase                                                                      | 5.4 |
| 1417149_at   | 18452 procollagen-proline, 2-oxoglutarate 4-dioxygenase (proline 4-hydroxylase), alpha II polypeptide | 5.4 |
| 1451415_at   | 69068 RIKEN cDNA 1810011O10 gene                                                                      | 5.4 |
| 1418203_at   | 58801 phorbol-12-myristate-13-acetate-induced protein 1                                               | 5.3 |
| 1421640_a_at | 21353 TRAF family member-associated Nf-kappa B activator                                              | 5.3 |
| 1434980_at   | 320207 phosphoinositide-3-kinase, regulatory subunit 5, p101                                          | 5.3 |
| 1419450_at   | 66612 ORM1-like 3 (S. cerevisiae)                                                                     | 5.3 |
| 1420991_at   | 107765 ankyrin repeat domain 1 (cardiac muscle)                                                       | 5.3 |
| 1447936_at   | 69221 RIKEN cDNA 2410006H16 gene                                                                      | 5.3 |
| 1417409_at   | 16476 Jun oncogene                                                                                    | 5.3 |
| 1448596_at   | 102857 solute carrier family 6 (neurotransmitter transporter, creatine), member 8                     | 5.2 |
| 1418949_at   | 23886 growth differentiation factor 15                                                                | 5.2 |
| 1419399_at   | 17777 microsomal triglyceride transfer protein                                                        | 5.2 |
| 1421446_at   | 18752 protein kinase C, gamma                                                                         | 5.2 |
| 1434442_at   | 52331 DNA segment, Chr 5, ERATO Doi 593, expressed                                                    | 5.2 |
| 1427957_at   | 109254 RIKEN cDNA 9530008L14 gene                                                                     | 5.1 |
| 1440967_at   | 66898 BAI1-associated protein 2-like 1                                                                | 5.1 |
| 1457268_at   | 208266 DOT1-like, histone H3 methyltransferase (S. cerevisiae)                                        | 5.1 |
| 1427905_at   | 67509 RIKEN cDNA 1810063B07 gene                                                                      | 5.1 |
| 1426700_a_at | 103135 ubiquitin specific protease 52                                                                 | 5.1 |
| 1452626_a_at | 69064 RIKEN cDNA 1810014F10 gene                                                                      | 5.1 |
| 1417256_at   | 17386 matrix metalloproteinase 13                                                                     | 5.0 |
| 1423389_at   | 17131 MAD homolog 7 (Drosophila)                                                                      | 5.0 |
| 1449133_at   | 20753 small proline-rich protein 1A                                                                   | 5.0 |
| 1434830_at   | 17119 Max dimerization protein                                                                        | 5.0 |
| 1422018_at   | 15273 human immunodeficiency virus type I enhancer binding protein 2                                  | 5.0 |
| 1443951_at   | 320496 RIKEN cDNA C230076A16 gene                                                                     | 5.0 |
| 1416480_a_at | 56295 hypoxia induced gene 1                                                                          | 5.0 |
| 1416401_at   | 12521 kangai 1 (suppression of tumorigenicity 6, prostate)                                            | 5.0 |
| 1451006_at   | 22436 xanthine dehydrogenase                                                                          | 5.0 |
| 1416268_at   | 23872 E26 avian leukemia oncogene 2, 3' domain                                                        | 5.0 |
| 1424043_at   | 67418 peptidylprolyl isomerase (cyclophilin)-like 4                                                   | 4.9 |
| 1449891_a_at | 73379 discoidin, CUB and LCCL domain containing 2                                                     | 4.9 |
| 1417060_at   | 76497 protein phosphatase 1, regulatory (inhibitor) subunit 11                                        | 4.9 |
| 1427159_at   | 74737 RIKEN cDNA 2500001H09 gene                                                                      | 4.9 |
| 1426300_at   | 11658 activated leukocyte cell adhesion molecule                                                      | 4.9 |
| 1418808_at   | 19682 retinol dehydrogenase 5                                                                         | 4.8 |
| 1427691_a_at | 15976 interferon (alpha and beta) receptor 2                                                          | 4.8 |
| 1415671_at   | 11972 ATPase, H+ transporting, V0 subunit D isoform 1                                                 | 4.8 |
| 1426501_a_at | 211550 Traf2 binding protein                                                                          | 4.8 |
| 1416602_a_at | 19365 RAD52 homolog (S. cerevisiae)                                                                   | 4.8 |
| 1450970_at   | 14718 glutamate oxaloacetate transaminase 1, soluble                                                  | 4.8 |
| 1435499_at   | 270035 RIKEN cDNA D030041N04 gene                                                                     | 4.8 |
| 1418188_a_at | 54409 receptor (calcitonin) activity modifying protein 2                                              | 4.8 |
| 1428383_a_at | 268721 RIKEN cDNA 2310021P13 gene                                                                     | 4.8 |
| 1450922_a_at | 21808 transforming growth factor, beta 2                                                              | 4.7 |

|              |                                                                                                      |     |
|--------------|------------------------------------------------------------------------------------------------------|-----|
| 1449324_at   | 434220 /// ERO1-like (S. cerevisiae) /// hypothetical gene supported by AK009667; NM_015774<br>50527 | 4.7 |
| 1419793_at   |                                                                                                      | 4.7 |
| 1430762_at   | 235345 RIKEN cDNA 4833427G06 gene                                                                    | 4.7 |
| 1424861_at   | 100662 RIKEN cDNA D930016D06 gene                                                                    | 4.7 |
| 1455394_at   |                                                                                                      | 4.7 |
| 1427079_at   | 100732 microtubule-associated protein, RP/EB family, member 3                                        | 4.7 |
| 1435229_at   | 235283 RIKEN cDNA A930008A22 gene                                                                    | 4.6 |
| 1438684_at   | 77976 ZNUAK family, SNF1-like kinase, 1                                                              | 4.6 |
| 1455765_a_at | 20927 ATP-binding cassette, sub-family C (CFTR/MRP), member 8                                        | 4.6 |
| 1448961_at   | 18828 phospholipid scramblase 2                                                                      | 4.6 |
| 1418131_at   | 56045 SAM domain and HD domain, 1                                                                    | 4.6 |
| 1450100_a_at | 56070 transcription elongation regulator 1 (CA150)                                                   | 4.5 |
| 1415997_at   | 56338 thioredoxin interacting protein                                                                | 4.5 |
| 1422945_a_at | 16574 kinesin family member 5C                                                                       | 4.5 |
| 1432478_a_at | 75234 IBR domain containing 3                                                                        | 4.5 |
| 1440686_at   | 213171 proteinase, serine 27                                                                         | 4.5 |
| 1420772_a_at | 14605 TSC22 domain family 3                                                                          | 4.4 |
| 1429527_a_at | 22038 /// phospholipid scramblase 1 /// similar to phospholipid scramblase 1<br>433328               | 4.4 |
| 1434348_at   | 225020 fasciculation and elongation protein zeta 2 (zygin II)                                        | 4.4 |
| 1454928_at   | 224903 scaffold attachment factor B                                                                  | 4.4 |
| 1422886_a_at | 12750 CDC like kinase 4                                                                              | 4.4 |
| 1417393_a_at | 67389 RIKEN cDNA 1110035L05 gene                                                                     | 4.4 |
| 1459920_at   | Transcribed locus                                                                                    | 4.4 |
| 1433523_at   | 231858 RIKEN cDNA D930005D10 gene                                                                    | 4.4 |
| 1422053_at   | 16323 inhibin beta-A                                                                                 | 4.4 |
| 1452406_x_at | 170942 erythroid differentiation regulator 1                                                         | 4.4 |
| 1436074_at   | 243910 cDNA sequence AY078069                                                                        | 4.4 |
| 1416600_a_at | 54720 Down syndrome critical region homolog 1 (human)                                                | 4.4 |
| 1425019_at   | 217379 UBX domain containing 4                                                                       | 4.4 |
| 1436073_at   | 213993 RIKEN cDNA A630007B06 gene                                                                    | 4.4 |
| 1428372_at   | 76954 suppression of tumorigenicity 5                                                                | 4.3 |
| 1431843_a_at | 18037 nuclear factor of kappa light polypeptide gene enhancer in B-cells inhibitor, epsilon          | 4.3 |
| 1425047_a_at | 70873 RIKEN cDNA 4921517L17 gene                                                                     | 4.3 |
| 1427171_at   | 109263 rearranged L-myc fusion sequence                                                              | 4.3 |
| 1453345_at   | 70701 RIKEN cDNA 3830408G10 gene                                                                     | 4.3 |
| 1426928_at   | 70829 RIKEN cDNA 4633402D15 gene                                                                     | 4.3 |
| 1429412_at   | 223527 enhancer of yellow 2 homolog (Drosophila)                                                     | 4.3 |
| 1428560_at   | 72322 exportin 5                                                                                     | 4.3 |
| 1416067_at   | 15982 interferon-related developmental regulator 1                                                   | 4.3 |
| 1417032_at   | 22213 ubiquitin-conjugating enzyme E2G 2                                                             | 4.3 |
| 1423944_at   | 15458 hemopexin                                                                                      | 4.3 |
| 1455487_at   | 69900 RIKEN cDNA 2600014M03 gene                                                                     | 4.3 |
| 1449041_a_at | 22051 thyroid hormone receptor interactor 6                                                          | 4.3 |
| 1418777_at   | 20300 chemokine (C-C motif) ligand 25                                                                | 4.3 |
| 1421365_at   | 14313 follistatin                                                                                    | 4.2 |
| 1453294_at   | 74173 RIKEN cDNA 1700012B15 gene                                                                     | 4.2 |
| 1447961_s_at | 60441 mitochondrial ribosomal protein L38                                                            | 4.2 |
| 1437204_a_at |                                                                                                      | 4.2 |
| 1439497_at   | Transcribed locus                                                                                    | 4.2 |
| 1447802_x_at |                                                                                                      | 4.2 |
| 1451780_at   | 17060 B-cell linker                                                                                  | 4.2 |
| 1459681_at   | Transcribed locus                                                                                    | 4.2 |
| 1420617_at   | 67579 cytoplasmic polyadenylation element binding protein 4                                          | 4.2 |
| 1422748_at   | 24136 zinc finger homeobox 1b                                                                        | 4.1 |
| 1448562_at   | 22271 uridine phosphorylase 1                                                                        | 4.1 |
| 1428468_at   | 73205 RIKEN cDNA 3110043O21 gene                                                                     | 4.1 |
| 1436594_at   | 210105 RIKEN cDNA C630016O21 gene                                                                    | 4.1 |
| 1417707_at   | 100637 RIKEN cDNA B230342M21 gene                                                                    | 4.1 |
| 1426519_at   | 18451 procollagen-proline, 2-oxoglutarate 4-dioxygenase (proline 4-hydroxylase), alpha 1 polypeptide | 4.0 |
| 1456389_at   | 319891 RIKEN cDNA 9130203F04 gene                                                                    | 4.0 |
| 1424148_a_at | 106766 expressed sequence AW049765                                                                   | 4.0 |
| 1436350_at   | 241520 RIKEN cDNA D430039N05 gene                                                                    | 4.0 |
| 1418863_at   | 14463 GATA binding protein 4                                                                         | 4.0 |
| 1423622_a_at | 56706 cyclin L1                                                                                      | 4.0 |
| 1434405_at   | 216742 RIKEN cDNA A730024A03 gene                                                                    | 4.0 |
| 1420909_at   | 22339 vascular endothelial growth factor A                                                           | 4.0 |
| 1433674_a_at | 83673 RNA, U22 small nucleolar                                                                       | 4.0 |
| 1460638_at   | 107271 tyrosyl-tRNA synthetase                                                                       | 4.0 |
| 1427736_a_at | 54199 chemokine (C-C motif) receptor-like 2                                                          | 3.9 |

|              |                                                                            |     |
|--------------|----------------------------------------------------------------------------|-----|
| 1416418_at   | 57436 gamma-aminobutyric acid (GABA(A)) receptor-associated protein-like 1 | 3.9 |
| 1418714_at   | 18218 dual specificity phosphatase 8                                       | 3.9 |
| 1424354_at   | 68487 RIKEN cDNA 1110007F12 gene                                           | 3.9 |
| 1427385_s_at | 109711 actinin, alpha 1                                                    | 3.9 |
| 1434300_at   | 67958 RIKEN cDNA 2610101N10 gene                                           | 3.9 |
| 1416831_at   | 18010 neuraminidase 1                                                      | 3.9 |
| 1449946_a_at | 68040 RIKEN cDNA 3110024A21 gene                                           | 3.8 |
| 1449949_a_at | 13052 coxsackievirus and adenovirus receptor                               | 3.8 |
| 1426681_at   | 217331 zinc finger CCCH type containing 5                                  | 3.8 |
| 1460562_at   | 101592 elongation factor Tu GTP binding domain containing 1                | 3.8 |
| 1418102_at   | 15205 hairy and enhancer of split 1 (Drosophila)                           | 3.8 |
| 1422544_at   | 17909 myosin X                                                             | 3.8 |
| 1425507_at   | 76688 ADP-ribosylation factor related protein 1                            | 3.8 |
| 1431646_a_at | 58244 syntaxin 6                                                           | 3.8 |
| 1451385_at   | 70186 RIKEN cDNA 2310056P07 gene                                           | 3.7 |
| 1422803_at   | 83554 follistatin-like 3                                                   | 3.7 |
| 1425336_x_at | 14972 histocompatibility 2, K1, K region                                   | 3.7 |
| 1437480_at   | 66140 RIKEN cDNA 1110001A07 gene                                           | 3.7 |
| 1448806_at   |                                                                            | 3.7 |
| 1439488_at   | Transcribed locus                                                          | 3.7 |
| 1418495_at   | 57432 zinc finger CCCH type containing 8                                   | 3.7 |
| 1420499_at   | 14528 GTP cyclohydrolase 1                                                 | 3.7 |
| 1421712_at   | 20339 selectin, endothelial cell                                           | 3.7 |
| 1422027_a_at | 23871 E26 avian leukemia oncogene 1, 5' domain                             | 3.7 |
| 1431082_a_at | 67657 RAB, member of RAS oncogene family-like 3                            | 3.7 |
| 1460691_at   | 213753 zinc finger protein 598                                             | 3.7 |
| 1421089_a_at | 72400 RIKEN cDNA 2610028A01 gene                                           | 3.7 |
| 1415881_at   | 66092 growth hormone inducible transmembrane protein                       | 3.7 |
| 1421236_at   | 192656 receptor (TNFRSF)-interacting serine-threonine kinase 2             | 3.7 |
| 1426806_at   | 109019 RIKEN cDNA 5830411E10 gene                                          | 3.7 |
| 1440145_at   |                                                                            | 3.7 |
| 1428858_at   | 73770 WD repeat domain 70                                                  | 3.6 |
| 1455187_at   | 230848 zinc finger and BTB domain containing 40                            | 3.6 |
| 1453228_at   | 74732 syntaxin 11                                                          | 3.6 |
| 1424817_at   | 70997 sperm flagellar 1                                                    | 3.6 |
| 1415798_at   | 12305 discoidin domain receptor family, member 1                           | 3.6 |
| 1425305_at   | 114565 zinc finger protein 295                                             | 3.6 |
| 1436802_at   | 16201 interleukin enhancer binding factor 3                                | 3.6 |
| 1450838_x_at | 383438 /// ribosomal protein L37 /// similar to ribosomal protein L37      | 3.6 |
|              | 67281                                                                      |     |
| 1418469_at   | 268903 nuclear receptor interacting protein 1                              | 3.6 |
| 1455491_at   | 432467 similar to heterogeneous nuclear ribonucleoprotein H3 isoform a     | 3.6 |
| 1435458_at   |                                                                            | 3.6 |
| 1459343_at   | 217026 RIKEN cDNA 2700008B19 gene                                          | 3.6 |
| 1419761_a_at | 14391 GA repeat binding protein, beta 1                                    | 3.6 |
| 1422218_at   | 18439 purinergic receptor P2X, ligand-gated ion channel, 7                 | 3.5 |
| 1424731_at   | 217011 notchless homolog 1 (Drosophila)                                    | 3.5 |
| 1428682_at   | 78751 zinc finger CCCH type containing 6                                   | 3.5 |
| 1418861_at   | 59004 protein inhibitor of activated STAT, 4                               | 3.5 |
| 1428909_at   | 319269 RIKEN cDNA A130040M12 gene                                          | 3.5 |
| 1445758_at   |                                                                            | 3.5 |
| 1427578_a_at | 16418 integrin beta 4 binding protein                                      | 3.5 |
| 1448050_s_at | 26921 mitogen-activated protein kinase kinase kinase kinase 4              | 3.5 |
| 1439073_at   | 224585 Zinc finger protein 160                                             | 3.5 |
| 1441081_a_at | 68763 RIKEN cDNA 1110038B12 gene                                           | 3.5 |
| 1419132_at   | 24088 toll-like receptor 2                                                 | 3.5 |
| 1422473_at   | 18578 phosphodiesterase 4B, cAMP specific                                  | 3.5 |
| 1452521_a_at | 18793 urokinase plasminogen activator receptor                             | 3.5 |
| 1426459_s_at | 106064 expressed sequence AW549877                                         | 3.5 |
| 1427705_a_at | 18033 nuclear factor of kappa light chain gene enhancer in B-cells 1, p105 | 3.5 |
| 1431284_a_at | 73658 RIKEN cDNA 2210013K02 gene                                           | 3.5 |
| 1425296_a_at | 50780 regulator of G-protein signaling 3                                   | 3.4 |
| 1421679_a_at | 12575 cyclin-dependent kinase inhibitor 1A (P21)                           | 3.4 |
| 1422966_a_at | 22042 transferrin receptor                                                 | 3.4 |
| 1415814_at   | 11966 ATPase, H+ transporting, V1 subunit B, isoform 2                     | 3.4 |
| 1423117_at   | 80912 pumilio 1 (Drosophila)                                               | 3.4 |
| 1423296_at   | 57296 proteasome (prosome, macropain) 26S subunit, non-ATPase, 8           | 3.4 |
| 1428982_at   | 320817 RIKEN cDNA D530031C13 gene                                          | 3.4 |
| 1438233_at   | 226151 RIKEN cDNA 6030443O07 gene                                          | 3.4 |
| 1421058_at   | 11529 alcohol dehydrogenase 7 (class IV), mu or sigma polypeptide          | 3.4 |
| 1418835_at   | 21664 pleckstrin homology-like domain, family A, member 1                  | 3.4 |
| 1440040_at   | 12571 Cyclin-dependent kinase 6                                            | 3.4 |

|              |                                                                                          |     |
|--------------|------------------------------------------------------------------------------------------|-----|
| 1449110_at   | 11852 ras homolog gene family, member B                                                  | 3.4 |
| 1424211_at   | 70556 RIKEN cDNA 5730438N18 gene                                                         | 3.3 |
| 1429052_at   | 19266 protein tyrosine phosphatase, receptor type, D                                     | 3.3 |
| 1437969_s_at | 68327 RIKEN cDNA 0610007P22 gene                                                         | 3.3 |
| 1422742_at   | 110521 human immunodeficiency virus type I enhancer binding protein 1                    | 3.3 |
| 1447661_at   | Transcribed locus                                                                        | 3.3 |
| 1433668_at   | 108767 proline-rich nuclear receptor coactivator 1                                       | 3.3 |
| 1422599_s_at | 20841 zinc finger protein 143                                                            | 3.3 |
| 1423044_at   | 114863 proline synthetase co-transcribed                                                 | 3.3 |
| 1444644_x_at | 69694 TatD DNase domain containing 1                                                     | 3.3 |
| 1418539_a_at | 19267 protein tyrosine phosphatase, receptor type, E                                     | 3.3 |
| 1423686_a_at | 66151 RIKEN cDNA 1110020C13 gene                                                         | 3.3 |
| 1424818_at   | 223774 asparagine-linked glycosylation 12 homolog (yeast, alpha-1,6-mannosyltransferase) | 3.3 |
| 1450247_a_at | 56807 secretory carrier membrane protein 5                                               | 3.3 |
| 1441691_at   | Transcribed locus                                                                        | 3.3 |
| 1416272_at   | 56692 mitogen-activated protein kinase kinase 1 interacting protein 1                    | 3.3 |
| 1417225_at   | 65106 ADP-ribosylation factor-like 6 interacting protein 5                               | 3.3 |
| 1426827_at   | 231386 RIKEN cDNA A730098D12 gene                                                        | 3.3 |
| 1451021_a_at | 12224 Kruppel-like factor 5                                                              | 3.3 |
| 1418960_at   | 239510 PHD finger protein 20-like 1                                                      | 3.2 |
| 1435872_at   |                                                                                          | 3.2 |
| 1416290_a_at | 23996 proteasome (prosome, macropain) 26S subunit, ATPase, 4                             | 3.2 |
| 1418503_at   | 15526 heat shock protein 9A                                                              | 3.2 |
| 1435852_at   | 101809 sprouty-related, EVH1 domain containing 3                                         | 3.2 |
| 1439538_at   | 67433 RIKEN cDNA 0610011N22 gene                                                         | 3.2 |
| 1415941_s_at | 100494 expressed sequence AA407930                                                       | 3.2 |
| 1428572_at   | 70350 brain abundant, membrane attached signal protein 1                                 | 3.2 |
| 1451485_at   | 67684 RIKEN cDNA 3300001P08 gene                                                         | 3.2 |
| 1423534_at   | 18567 programmed cell death 2                                                            | 3.2 |
| 1449338_at   | 52717 DNA segment, Chr 10, ERATO Doi 641, expressed                                      | 3.2 |
| 1449437_at   | 28040 DNA segment, Chr 6, Wayne State University 163, expressed                          | 3.2 |
| 1446131_at   |                                                                                          | 3.2 |
| 1417389_at   | 14733 glypican 1                                                                         | 3.2 |
| 1420367_at   | 68184 density-regulated protein                                                          | 3.2 |
| 1451622_at   | 68421 LMBR1 domain containing 1                                                          | 3.2 |
| 1417500_a_at | 21817 transglutaminase 2, C polypeptide                                                  | 3.2 |
| 1430776_s_at | 70615 ankyrin repeat domain 24                                                           | 3.2 |
| 1450113_at   |                                                                                          | 3.2 |
| 1450534_x_at | 56628 MHC (A.CAJ)(H-2K-f) class I antigen                                                | 3.2 |
| 1429070_at   | 71254 RIKEN cDNA 4933440H19 gene                                                         | 3.2 |
| 1436524_at   | 107243 RIKEN cDNA 4833438C02 gene                                                        | 3.2 |
| 1434364_at   | 53859 mitogen-activated protein kinase kinase kinase 14                                  | 3.2 |
| 1452110_at   | 210009 5-methyltetrahydrofolate-homocysteine methyltransferase reductase                 | 3.2 |
| 1416487_a_at | 22601 yes-associated protein 1                                                           | 3.2 |
| 1430987_s_at | 60321 WW domain binding protein 11                                                       | 3.2 |
| 1423446_at   | 13144 death-associated kinase 3                                                          | 3.1 |
| 1423549_at   | 55963 solute carrier family 1 (glutamate/neutral amino acid transporter), member 4       | 3.1 |
| 1427005_at   | 20620 polo-like kinase 2 (Drosophila)                                                    | 3.1 |
| 1435394_s_at | 11853 ras homolog gene family, member C                                                  | 3.1 |
| 1450738_at   | 16564 kinesin family member 21A                                                          | 3.1 |
| 1419122_at   | 17299 methyltransferase-like 1                                                           | 3.1 |
| 1417329_at   | 54338 solute carrier family 23 (nucleobase transporters), member 2                       | 3.1 |
| 1423432_at   | 83946 pleckstrin homology domain interacting protein                                     | 3.1 |
| 1425099_a_at | 11865 aryl hydrocarbon receptor nuclear translocator-like                                | 3.1 |
| 1455096_at   |                                                                                          | 3.1 |
| 1417034_at   | 67091 trafficking protein particle complex 6A                                            | 3.1 |
| 1419544_at   | 66335 ATPase, H+ transporting, V1 subunit C, isoform 1                                   | 3.1 |
| 1448793_a_at | 20971 syndecan 4                                                                         | 3.1 |
| 1423085_at   | 13643 ephrin B3                                                                          | 3.1 |
| 1418240_at   | 14469 guanylate nucleotide binding protein 2                                             | 3.1 |
| 1423760_at   | 12505 CD44 antigen                                                                       | 3.1 |
| 1428487_s_at | 67876 RIKEN cDNA 1500041J02 gene                                                         | 3.1 |
| 1438803_s_at | 74718 sorting nexin 16                                                                   | 3.1 |
| 1458718_at   | 243025 Gene model 446, (NCBI)                                                            | 3.1 |
| 1452178_at   | 18810 plectin 1                                                                          | 3.1 |
| 1423970_at   | 73666 THO complex 3                                                                      | 3.1 |
| 1451123_at   | 212706 RIKEN cDNA C330016O10 gene                                                        | 3.1 |
| 1443072_at   | 171395 Polycystic kidney disease 1 like 1                                                | 3.1 |
| 1419088_at   | 21859 tissue inhibitor of metalloproteinase 3                                            | 3.0 |
| 1424380_at   | 330192 cDNA sequence BC026744                                                            | 3.0 |
| 1418453_a_at | 11931 ATPase, Na+/K+ transporting, beta 1 polypeptide                                    | 3.0 |
| 1421818_at   | 12053 B-cell leukemia/lymphoma 6                                                         | 3.0 |

|              |                                                                                          |     |
|--------------|------------------------------------------------------------------------------------------|-----|
| 1416994_at   | 66827 tetratricopeptide repeat domain 1                                                  | 3.0 |
| 1443558_s_at | 103466 RIKEN cDNA C630002B14 gene                                                        | 3.0 |
| 1417088_at   | 26919 zinc finger protein 346                                                            | 3.0 |
| 1434241_at   | 210544 WD repeat domain 67                                                               | 3.0 |
| 1418032_at   | 101142 RIKEN cDNA 2700050P07 gene                                                        | 3.0 |
| 1421499_a_at | 19250 protein tyrosine phosphatase, non-receptor type 14                                 | 3.0 |
| 1431561_a_at | 71723 DEAH (Asp-Glu-Ala-His) box polypeptide 34                                          | 3.0 |
| 1427955_a_at | 26901 differentially expressed in B16F10 1                                               | 3.0 |
| 1451491_at   | 75284 RIKEN cDNA 4930556P03 gene                                                         | 3.0 |
| 1437176_at   | 434341 similar to nucleotide-binding oligomerization domains 27                          | 3.0 |
| 1428226_at   | 68966 RIKEN cDNA 1500001L15 gene                                                         | 3.0 |
| 1457042_at   |                                                                                          | 3.0 |
| 1416409_at   | 11430 acyl-Coenzyme A oxidase 1, palmitoyl                                               | 3.0 |
| 1424150_at   | 233552 glycerophosphodiester phosphodiesterase domain containing 5                       | 3.0 |
| 1424892_at   | 22757 zinc finger protein 95                                                             | 3.0 |
| 1433851_at   |                                                                                          | 3.0 |
| 1429463_at   | 108079 protein kinase, AMP-activated, alpha 2 catalytic subunit                          | 3.0 |
| 1420975_at   | 22385 bromodomain adjacent to zinc finger domain, 1B                                     | 2.9 |
| 1449800_x_at | 71838 PHD finger protein 7                                                               | 2.9 |
| 1454923_at   | 107036 expressed sequence AW214353                                                       | 2.9 |
| 1437751_at   | 19017 peroxisome proliferative activated receptor, gamma, coactivator 1 alpha            | 2.9 |
| 1448417_at   | 18081 ninjurin 1                                                                         | 2.9 |
| 1439780_at   | 66229 ribosomal protein L7-like 1                                                        | 2.9 |
| 1448057_at   | Transcribed locus                                                                        | 2.9 |
| 1423103_at   |                                                                                          | 2.9 |
| 1416991_at   | 68291 mitochondrial translation optimization 1 homolog (S. cerevisiae)                   | 2.9 |
| 1442918_at   | 260315 neuron navigator 3                                                                | 2.9 |
| 1456284_at   | PREDICTED: Mus musculus similar to PRP2 (LOC380863), mRNA                                | 2.9 |
| 1448049_at   | 108829 Jumonji domain containing 1C                                                      | 2.9 |
| 1420649_at   | 11906 AT motif binding factor 1                                                          | 2.9 |
| 1423507_a_at | 64383 sirtuin 2 (silent mating type information regulation 2, homolog) 2 (S. cerevisiae) | 2.9 |
| 1424533_a_at | 67291 RIKEN cDNA 3110023B02 gene                                                         | 2.9 |
| 1424996_at   | 12633 CASP8 and FADD-like apoptosis regulator                                            | 2.9 |
| 1418174_at   | 13170 D site albumin promoter binding protein                                            | 2.8 |
| 1419087_s_at | 67465 splicing factor 3a, subunit 1                                                      | 2.8 |
| 1421307_at   | 71934 carbonic anhydrase 13                                                              | 2.8 |
| 1416615_at   | 53895 caseinolytic protease, ATP-dependent, proteolytic subunit homolog (E. coli)        | 2.8 |
| 1417193_at   | 20656 superoxide dismutase 2, mitochondrial                                              | 2.8 |
| 1434726_at   | 106757 RIKEN cDNA 4933402B14 gene                                                        | 2.8 |
| 1456880_at   |                                                                                          | 2.8 |
| 1431885_a_at | 71711 MUS81 endonuclease homolog (yeast)                                                 | 2.8 |
| 1435280_at   | 105178 expressed sequence AI452195                                                       | 2.8 |
| 1425810_a_at | 13007 cysteine and glycine-rich protein 1                                                | 2.8 |
| 1427672_a_at | 22289 ubiquitously transcribed tetratricopeptide repeat gene, X chromosome               | 2.8 |
| 1428674_at   | 66921 PRP38 pre-mRNA processing factor 38 (yeast) domain containing B                    | 2.8 |
| 1416186_at   | 52830 proline-rich nuclear receptor coactivator 2                                        | 2.8 |
| 1426536_at   | 93697 NMDA receptor-regulated gene 2                                                     | 2.8 |
| 1428557_a_at | 72085 O-sialoglycoprotein endopeptidase-like 1                                           | 2.8 |
| 1455196_s_at | 380856 expressed sequence AA987161                                                       | 2.8 |
| 1427540_at   | 52696 ZW10 interactor                                                                    | 2.8 |
| 1460323_at   | 110960 threonyl-tRNA synthetase                                                          | 2.8 |
| 1434855_at   | 245847 RIKEN cDNA 5730457F11 gene                                                        | 2.8 |
| 1427009_at   | 16776 laminin, alpha 5                                                                   | 2.8 |
| 1436183_at   | 319257 RIKEN cDNA 9830115L13 gene                                                        | 2.8 |
| 1418369_at   | 19075 DNA primase, p49 subunit                                                           | 2.8 |
| 1419543_a_at | 20462 splicing factor, arginine/serine-rich 10 (transformer 2 homolog, Drosophila)       | 2.8 |
| 1425262_at   | 12611 CCAAT/enhancer binding protein (C/EBP), gamma                                      | 2.8 |
| 1426898_at   | 66513 mitogen-activated protein kinase kinase 7 interacting protein 1                    | 2.7 |
| 1436559_a_at | 53380 proteasome (prosome, macropain) 26S subunit, non-ATPase, 10                        | 2.7 |
| 1460561_x_at | 20364 selenoprotein W, muscle 1                                                          | 2.7 |
| 1442654_at   | Transcribed locus                                                                        | 2.7 |
| 1425536_at   |                                                                                          | 2.7 |
| 1435526_at   | 240832 torsin A interacting protein 2                                                    | 2.7 |
| 1454771_at   |                                                                                          | 2.7 |
| 1438238_at   | 72071 RIKEN cDNA 2010315B03 gene                                                         | 2.7 |
| 1419575_s_at | 30046 zinc finger protein 292                                                            | 2.7 |
| 1426721_s_at | 99929 TCDD-inducible poly(ADP-ribose) polymerase                                         | 2.7 |
| 1450798_at   | 81877 tenascin XB                                                                        | 2.7 |
| 1434025_at   | Transcribed locus                                                                        | 2.7 |
| 1419650_at   | 22763 zinc finger RNA binding protein                                                    | 2.7 |
| 1428635_at   | 69156 catechol-O-methyltransferase domain containing 1                                   | 2.7 |
| 1456879_at   | 232236 RIKEN cDNA C130022K22 gene                                                        | 2.7 |



|              |                                                                                         |     |
|--------------|-----------------------------------------------------------------------------------------|-----|
| 1416304_at   | 56722 LPS-induced TN factor                                                             | 2.7 |
| 1425319_s_at | 67797 RIKEN cDNA 6530403A03 gene                                                        | 2.7 |
| 1418605_at   | 22025 nuclear receptor subfamily 2, group C, member 1                                   | 2.6 |
| 1451095_at   | 27053 asparagine synthetase                                                             | 2.6 |
| 1460278_a_at | 28075 DNA segment, Chr 15, Wayne State University 75, expressed                         | 2.6 |
| 1448271_a_at | 56200 DEAD (Asp-Glu-Ala-Asp) box polypeptide 21                                         | 2.6 |
| 1417240_at   | 22793 zyxin                                                                             | 2.6 |
| 1426290_at   | 66254 RIKEN cDNA 1500031M22 gene                                                        | 2.6 |
| 1428675_at   | 66193 RIKEN cDNA 1110049F12 gene                                                        | 2.6 |
| 1455210_at   | 387609 zinc fingers and homeoboxes protein 2                                            | 2.6 |
| 1419046_at   | 59053 brain protein 16                                                                  | 2.6 |
| 1438062_at   | 320612 RIKEN cDNA 4832420A03 gene                                                       | 2.6 |
| 1449832_at   | 73553 RIKEN cDNA 1700091H14 gene                                                        | 2.6 |
| 1454045_a_at | 260345 /// RIKEN cDNA 4933424M23 gene /// silencer-associated factor (Saf) pseudogene   | 2.6 |
|              | 74451                                                                                   |     |
| 1423122_at   | 69534 arginine vasopressin-induced 1                                                    | 2.6 |
| 1423552_at   | 68192 leptin receptor overlapping transcript-like 1                                     | 2.6 |
| 1416038_at   | 56463 expressed sequence AL033314                                                       | 2.6 |
| 1433980_at   | 81601 HIV-1 tat interactive protein, homolog (human)                                    | 2.6 |
| 1423708_a_at | 23874 phenylalanine-tRNA synthetase-like, beta subunit                                  | 2.6 |
| 1426653_at   | 17215 minichromosome maintenance deficient 3 (S. cerevisiae)                            | 2.6 |
| 1415747_s_at | 66878 RIO kinase 3 (yeast)                                                              | 2.5 |
| 1424250_a_at | 71704 Rho guanine nucleotide exchange factor (GEF) 3                                    | 2.5 |
| 1421378_s_at | 17250 ATP-binding cassette, sub-family C (CFTR/MRP), member 1                           | 2.5 |
| 1424309_a_at | 17434 molybdenum cofactor synthesis 2                                                   | 2.5 |
| 1417392_a_at | 20540 solute carrier family 7 (cationic amino acid transporter, y+ system), member 7    | 2.5 |
| 1439371_x_at | 21856 translocator of inner mitochondrial membrane 44                                   | 2.5 |
| 1428143_a_at | 66853 patatin-like phospholipase domain containing 2                                    | 2.5 |
| 1434873_a_at | 216859 centaurin, beta 1                                                                | 2.5 |
| 1415807_s_at | 20382 splicing factor, arginine/serine-rich 2 (SC-35)                                   | 2.5 |
| 1416104_at   | 24070 mannose-P-dolichol utilization defect 1                                           | 2.5 |
| 1423991_at   | 75416 RIKEN cDNA 2610033H07 gene                                                        | 2.5 |
| 1434100_x_at | Transcribed locus                                                                       | 2.5 |
| 1423156_at   | 54342 glucosamine-phosphate N-acetyltransferase 1                                       | 2.5 |
| 1433609_s_at | 20931 surfeit gene 2                                                                    | 2.5 |
| 1419554_at   | 16423 CD47 antigen (Rh-related antigen, integrin-associated signal transducer)          | 2.4 |
| 1426474_at   | 246782 ATP synthase mitochondrial F1 complex assembly factor 2                          | 2.4 |
| 1448529_at   | 21824 thrombomodulin                                                                    | 2.4 |
| 1435188_at   | 433627 similar to chromosome 1 open reading frame 51                                    | 2.4 |
| 1440299_at   | 214763 RIKEN cDNA E330016A19 gene                                                       | 2.4 |
| 1421151_a_at | 13836 Eph receptor A2                                                                   | 2.4 |
| 1416029_at   | 21847 Kruppel-like factor 10                                                            | 2.4 |
| 1455887_at   | 381903 asparagine-linked glycosylation 8 homolog (yeast, alpha-1,3-glucosyltransferase) | 2.4 |
| 1416148_at   | 114128 lysosomal-associated protein transmembrane 4B                                    | 2.3 |
| 1422557_s_at | 17748 metallothionein 1                                                                 | 2.3 |
| 1423393_at   | 29876 chloride intracellular channel 4 (mitochondrial)                                  | 2.3 |
| 1428919_at   | 75296 Fgfr1 oncogene partner                                                            | 2.3 |
| 1415971_at   | 17118 myristoylated alanine rich protein kinase C substrate                             | 2.3 |
| 1418078_at   | 19192 proteasome (prosome, macropain) 28 subunit, 3                                     | 2.3 |
| 1434931_at   | 18007 neogenin                                                                          | 2.3 |
| 1452207_at   |                                                                                         | 2.3 |
| 1419569_a_at | 57444 interferon-stimulated protein                                                     | 2.2 |
| 1424048_a_at | 72017 NAD(P)H:quinone oxidoreductase type 3, polypeptide A2                             | 2.2 |
| 1426713_s_at | 107508 glutamyl-prolyl-tRNA synthetase                                                  | 2.2 |
| 1428138_s_at | 67166 ADP-ribosylation factor-like 10C                                                  | 2.2 |

#### Downregulated transcripts

| Affymetrix probe set ID | Gene ID    | Gene description                                                                                  | Fold change compared to uninfected mGEPs |
|-------------------------|------------|---------------------------------------------------------------------------------------------------|------------------------------------------|
| 1416326_at              | 12925      | cysteine-rich protein 1 (intestinal)                                                              | -116.2                                   |
| 1451386_at              | 233016     | biliverdin reductase B (flavin reductase (NADPH))                                                 | -53.1                                    |
| 1436528_at              | 107250     | Kazal-type serine protease inhibitor domain 1                                                     | -35.3                                    |
| 1450966_at              | 74114      | carnitine O-octanoyltransferase                                                                   | -24.1                                    |
| 1435315_s_at            | 72904      | RIKEN cDNA 2900034E22 gene                                                                        | -23.3                                    |
| 1433465_a_at            | 101602     | expressed sequence AI467606                                                                       | -20.6                                    |
| 1434123_at              | 73068      | fucosyltransferase 11                                                                             | -20.3                                    |
| 1420622_a_at            | 15481 ///  | heat shock protein 8 /// similar to heat shock protein 8 /// similar to Heat shock cognate 71 kDa | -20.1                                    |
|                         | 432432 /// | protein                                                                                           |                                          |
|                         | 434047     |                                                                                                   |                                          |
| 1415897_a_at            | 56615      | microsomal glutathione S-transferase 1                                                            | -18.9                                    |
| 1449248_at              | 12724      | chloride channel 2                                                                                | -16.3                                    |

|              |                                                                                                                                |       |
|--------------|--------------------------------------------------------------------------------------------------------------------------------|-------|
| 1416368_at   | 14860 glutathione S-transferase, alpha 4                                                                                       | -16.0 |
| 1417220_at   | 14085 fumarylacetoacetate hydrolase                                                                                            | -15.9 |
| 1448661_at   | 18797 phospholipase C, beta 3                                                                                                  | -15.5 |
| 1418665_at   | 114663 inositol (myo)-1(or 4)-monophosphatase 2                                                                                | -15.3 |
| 1418980_a_at | 12799 cyclic nucleotide phosphodiesterase 1                                                                                    | -14.0 |
| 1417732_at   | 11752 annexin A8                                                                                                               | -13.5 |
| 1423642_at   | 227613 RIKEN cDNA 4930542G03 gene                                                                                              | -12.9 |
| 1450062_a_at | 94275 melanoma antigen, family D, 1                                                                                            | -12.7 |
| 1415822_at   | 20250 stearoyl-Coenzyme A desaturase 2                                                                                         | -12.4 |
| 1415995_at   | 12368 caspase 6                                                                                                                | -11.8 |
| 1418840_at   | 18569 programmed cell death 4                                                                                                  | -11.7 |
| 1428083_at   | 66961 RIKEN cDNA 2310043N10 gene                                                                                               | -11.5 |
| 1434997_at   | 78334 cell division cycle 2-like 6 (CDK8-like)                                                                                 | -11.4 |
| 1456393_at   | 66360 RIKEN cDNA 2310002J21 gene                                                                                               | -11.3 |
| 1426369_at   | 67420 male sterility domain containing 2                                                                                       | -11.2 |
| 1449542_at   | 18514 pre B-cell leukemia transcription factor 1                                                                               | -11.2 |
| 1415770_at   | 83669 WD repeat domain 6                                                                                                       | -11.0 |
| 1436761_s_at | 71721 RIKEN cDNA 1200015N20 gene                                                                                               | -10.9 |
| 1436796_at   | 68827 RIKEN cDNA 1110061A14 gene                                                                                               | -10.2 |
| 1427347_s_at | 22151 /// tubulin, beta 2 /// RIKEN cDNA 2410129E14 gene /// similar to TUBULIN BETA CHAIN (T BETA-15)                         | -10.0 |
|              | 544939 ///                                                                                                                     |       |
|              | 73710                                                                                                                          |       |
| 1437760_at   | 230145 UDP-N-acetyl-alpha-D-galactosamine:polypeptide N-acetyl-galactosaminyltransferase 12                                    | -9.7  |
| 1444451_at   | 23850 pappalysin 2                                                                                                             | -9.2  |
| 1423488_at   | 67468 monocyte to macrophage differentiation-associated                                                                        | -9.1  |
| 1438195_at   | 333433 glycerol-3-phosphate dehydrogenase 1-like                                                                               | -8.7  |
| 1449254_at   | 20750 secreted phosphoprotein 1                                                                                                | -8.7  |
| 1452398_at   | 74055 phospholipase C, epsilon 1                                                                                               | -8.7  |
| 1451643_a_at | 19342 RAB4B, member RAS oncogene family                                                                                        | -8.4  |
| 1423894_a_at | 67789 DALR anticodon binding domain containing 3                                                                               | -8.2  |
| 1457260_at   | 100224 RIKEN cDNA 7530403E16 gene                                                                                              | -8.1  |
| 1424226_at   | 217830 RIKEN cDNA 9030617O03 gene                                                                                              | -8.0  |
| 1423538_at   | 18203 N-terminal Asn amidase                                                                                                   | -8.0  |
| 1455878_at   | 70036 RIKEN cDNA 2700023E23 gene                                                                                               | -7.9  |
| 1416553_at   | 20892 stimulated by retinoic acid 13                                                                                           | -7.9  |
| 1415818_at   | 11749 annexin A6                                                                                                               | -7.9  |
| 1435292_at   | 210789 TBC1 domain family, member 4                                                                                            | -7.8  |
| 1423282_at   | 18738 phosphatidylinositol transfer protein, alpha                                                                             | -7.7  |
| 1428646_at   | 70402 RIKEN cDNA 2310056B04 gene                                                                                               | -7.6  |
| 1448533_at   | 66411 cytoskeleton-associated protein 1                                                                                        | -7.6  |
| 1423212_at   | 13619 polyhomeotic-like 1 (Drosophila)                                                                                         | -7.6  |
| 1448354_at   | 14381 glucose-6-phosphate dehydrogenase X-linked                                                                               | -7.5  |
| 1425194_a_at | 67788 RIKEN cDNA 6330577E15 gene                                                                                               | -7.5  |
| 1429739_a_at | 56218 zinc finger protein 278                                                                                                  | -7.4  |
| 1416256_a_at | 22154 tubulin, beta 5                                                                                                          | -7.4  |
| 1433751_at   | 227059 solute carrier family 39 (zinc transporter), member 10                                                                  | -7.4  |
| 1419115_at   | 66789 RIKEN cDNA 5430428G01 gene                                                                                               | -7.3  |
| 1433683_at   | 77411 RIKEN cDNA 9530027K23 gene                                                                                               | -7.3  |
| 1418463_at   | 18709 phosphatidylinositol 3-kinase, regulatory subunit, polypeptide 2 (p85 beta)                                              | -7.3  |
| 1424515_at   | 320063 RIKEN cDNA B230354K17 gene                                                                                              | -7.2  |
| 1428588_a_at | 67228 RIKEN cDNA 2810443J12 gene                                                                                               | -7.2  |
| 1417852_x_at | 12722 chloride channel calcium activated 1                                                                                     | -7.2  |
| 1428447_at   | 75712 transmembrane protein 14A                                                                                                | -7.2  |
| 1418595_at   | 57435 plasma membrane associated protein, S3-12                                                                                | -7.1  |
| 1424451_at   | 235674 3-ketoacyl-CoA thiolase B                                                                                               | -7.1  |
| 1428082_at   | 433256 acyl-CoA synthetase long-chain family member 5                                                                          | -7.1  |
| 1423667_at   | 232087 methionine adenosyltransferase II, alpha                                                                                | -7.0  |
| 1447372_at   | 69748 aldehyde dehydrogenase 16 family, member A1                                                                              | -7.0  |
| 1438527_at   | 244512 /// ribosomal protein L3 /// similar to 60S ribosomal protein L3 (L4)                                                   | -6.9  |
|              | 27367                                                                                                                          |       |
| 1438076_at   | 19946 ribosomal protein L30                                                                                                    | -6.8  |
| 1452040_a_at | 14793 cell division cycle associated 3                                                                                         | -6.7  |
| 1415984_at   | 11364 acetyl-Coenzyme A dehydrogenase, medium chain                                                                            | -6.7  |
| 1427904_s_at | 73694 RIKEN cDNA 2410091C18 gene                                                                                               | -6.5  |
| 1455604_at   | 545325 hypothetical protein LOC545325                                                                                          | -6.5  |
| 1416536_at   | 68114 melanoma associated antigen (mutated) 1                                                                                  | -6.5  |
| 1424577_at   | 229524 cDNA sequence BC008103                                                                                                  | -6.4  |
| 1431375_s_at | 57342 parvin, alpha                                                                                                            | -6.4  |
| 1435926_at   | 98357 RIKEN cDNA E030003F13 gene                                                                                               | -6.4  |
| 1443858_at   | 10 days neonate cortex cDNA, RIKEN full-length enriched library, clone:A830054P04<br>product:unknown EST, full insert sequence | -6.3  |
| 1424334_at   | 74257 tetraspanin 17                                                                                                           | -6.3  |

|              |                                                                                                         |      |
|--------------|---------------------------------------------------------------------------------------------------------|------|
| 1433672_at   | 215201 RIKEN cDNA 4732479N06 gene                                                                       | -6.2 |
| 1426350_at   | 217664 mannoside acetylglucosaminyltransferase 2                                                        | -6.1 |
| 1419292_at   | 78558 serine protease HTRA3                                                                             | -6.1 |
| 1449147_at   | 76969 carbohydrate (keratan sulfate Gal-6) sulfotransferase 1                                           | -6.1 |
| 1418209_a_at | 18645 profilin 2                                                                                        | -6.0 |
| 1423672_at   | 72421 RIKEN cDNA 2510042P03 gene                                                                        | -6.0 |
| 1440880_at   | 225651 metallophosphoesterase 1                                                                         | -6.0 |
| 1416261_at   | 67226 transmembrane protein 19                                                                          | -5.9 |
| 1448468_a_at | 16497 potassium voltage-gated channel, shaker-related subfamily, beta member 1                          | -5.9 |
| 1433868_at   |                                                                                                         | -5.9 |
| 1448196_at   | 108645 methionine adenosyltransferase II, beta                                                          | -5.8 |
| 1419927_s_at | 98710 RAB interacting factor                                                                            | -5.8 |
| 1415913_at   | 68052 ribosomal protein S13                                                                             | -5.8 |
| 1420046_s_at | 68877 MAF1 homolog (S. cerevisiae)                                                                      | -5.8 |
| 1418890_a_at | 19340 RAB3D, member RAS oncogene family                                                                 | -5.7 |
| 1435612_at   | 330908 opioid binding protein/cell adhesion molecule-like                                               | -5.7 |
| 1436747_at   | 319370 /// RIKEN cDNA 1110014K08 gene /// similar to RIKEN cDNA 1110014K08 gene                         | -5.7 |
|              | 545968                                                                                                  |      |
| 1419456_at   | 67880 dicarbonyl L-xylulose reductase                                                                   | -5.6 |
| 1434481_at   | 74026 RIKEN cDNA 4121402D02 gene                                                                        | -5.6 |
| 1423846_x_at | 22143 tubulin, alpha 2                                                                                  | -5.6 |
| 1416866_at   | 12068 blocked early in transport 1 homolog (S. cerevisiae)                                              | -5.6 |
| 1424062_at   | 216080 ubiquitin-conjugating enzyme E2D 1, UBC4/5 homolog (yeast)                                       | -5.5 |
| 1416868_at   | 12580 cyclin-dependent kinase inhibitor 2C (p18, inhibits CDK4)                                         | -5.5 |
| 1417969_at   | 76454 F-box only protein 31                                                                             | -5.5 |
| 1426517_at   | 14687 guanine nucleotide binding protein, alpha z subunit                                               | -5.5 |
| 1435735_x_at | 109815 histocompatibility 47                                                                            | -5.5 |
| 1420647_a_at | 16691 /// keratin complex 2, basic, gene 8 /// similar to cytokeratin EndoA - mouse                     | -5.4 |
|              | 434261                                                                                                  |      |
| 1429896_at   | 74756 RIKEN cDNA 5830408B19 gene                                                                        | -5.4 |
| 1418884_x_at | 22142 tubulin, alpha 1                                                                                  | -5.4 |
| 1434228_at   | 381511 protein phosphatase 2C, magnesium dependent, catalytic subunit                                   | -5.4 |
| 1417044_at   | 30949 leucine carboxyl methyltransferase 1                                                              | -5.4 |
| 1438201_at   | Transcribed locus                                                                                       | -5.4 |
| 1416044_at   | 14248 flightless I homolog (Drosophila)                                                                 | -5.4 |
| 1454060_a_at | 18176 neuroblastoma ras oncogene                                                                        | -5.4 |
| 1423484_at   | 83675 bicaudal C homolog 1 (Drosophila)                                                                 | -5.4 |
| 1428074_at   | 72309 RIKEN cDNA 2310037P21 gene                                                                        | -5.4 |
| 1423771_at   | 109042 protein kinase C, delta binding protein                                                          | -5.3 |
| 1418924_at   | 66985 RIKEN cDNA 2400009B11 gene                                                                        | -5.3 |
| 1437073_x_at | 105633 expressed sequence AV025504                                                                      | -5.3 |
| 1423067_at   | 80280 CDK5 regulatory subunit associated protein 3                                                      | -5.2 |
| 1434311_at   | 231464 CCR4-NOT transcription complex, subunit 6-like                                                   | -5.2 |
| 1430978_at   | 75617 ribosomal protein S25                                                                             | -5.2 |
| 1416374_at   | 55946 adaptor-related protein complex 3, mu 1 subunit                                                   | -5.2 |
| 1436373_at   | 269881 mitogen activated protein kinase kinase 10                                                       | -5.2 |
| 1424544_at   | 223649 nuclear receptor binding protein 2                                                               | -5.2 |
| 1451884_a_at | 27756 LSM2 homolog, U6 small nuclear RNA associated (S. cerevisiae)                                     | -5.1 |
| 1418157_at   | 13865 nuclear receptor subfamily 2, group F, member 1                                                   | -5.1 |
| 1460732_a_at | 19041 perioplakin                                                                                       | -5.1 |
| 1423034_at   | 52700 thioredoxin-like 5                                                                                | -5.1 |
| 1426499_at   | 227700 SH3-domain GRB2-like endophilin B2                                                               | -5.1 |
| 1426690_a_at | 20787 sterol regulatory element binding factor 1                                                        | -5.0 |
| 1451306_at   | 217946 cell division cycle associated 7 like                                                            | -5.0 |
| 1416499_a_at | 22428 dynactin 6                                                                                        | -5.0 |
| 1423732_at   | 72265 translocating chain-associating membrane protein 1                                                | -5.0 |
| 1434543_a_at | 66162 RIKEN cDNA 1110025L05 gene                                                                        | -5.0 |
| 1438634_x_at | 16796 LIM and SH3 protein 1                                                                             | -5.0 |
| 1418460_at   | 27059 SH3 domain protein D19                                                                            | -5.0 |
| 1426558_x_at | 66376 RIKEN cDNA 3100002L24 gene                                                                        | -5.0 |
| 1427020_at   | 219151 scavenger receptor class A, member 3                                                             | -5.0 |
| 1419449_a_at | 14678 guanine nucleotide binding protein, alpha inhibiting 2                                            | -5.0 |
| 1435557_at   | 234686 formin homology 2 domain containing 1                                                            | -5.0 |
| 1423712_a_at | 97541 glutaminyl-tRNA synthetase                                                                        | -5.0 |
| 1428321_at   | 68519 echinoderm microtubule associated protein like 1                                                  | -5.0 |
| 1450686_at   | 320276 /// RIKEN cDNA A130027P21 gene /// paraoxonase 2                                                 | -4.9 |
|              | 330260                                                                                                  |      |
| 1418467_at   | 66993 SWI/SNF related, matrix associated, actin dependent regulator of chromatin, subfamily d, member 3 | -4.9 |
| 1451322_at   | 69574 RIKEN cDNA 2310016A09 gene                                                                        | -4.9 |
| 1433581_at   | 68861 RIKEN cDNA 1190002N15 gene                                                                        | -4.9 |
| 1452908_at   | 64451 disco interacting protein 2 homolog (Drosophila)                                                  | -4.9 |

|              |                                                                                                                                                               |      |
|--------------|---------------------------------------------------------------------------------------------------------------------------------------------------------------|------|
| 1420637_at   | 110639 phosphoribosyl pyrophosphate synthetase 2                                                                                                              | -4.8 |
| 1427898_at   | 74132 ring finger protein (C3H2C3 type) 6                                                                                                                     | -4.8 |
| 1429089_s_at | 243219 RIKEN cDNA 2900026A02 gene                                                                                                                             | -4.8 |
| 1416311_s_at | 22144 /// tubulin, alpha 3 /// tubulin, alpha 7<br>22147                                                                                                      | -4.8 |
| 1423870_at   | 108909 RIKEN cDNA 2610208M17 gene                                                                                                                             | -4.8 |
| 1430332_a_at | 110006 glucuronidase, beta                                                                                                                                    | -4.8 |
| 1438115_a_at | 26941 solute carrier family 9 (sodium/hydrogen exchanger), isoform 3 regulator 1                                                                              | -4.8 |
| 1417214_at   | 80718 RAB27b, member RAS oncogene family                                                                                                                      | -4.8 |
| 1448519_at   | 21677 TEA domain family member 2                                                                                                                              | -4.8 |
| 1460035_at   | 12034 B-cell receptor-associated protein 37                                                                                                                   | -4.8 |
| 1434037_s_at | 18519 p300/CBP-associated factor                                                                                                                              | -4.8 |
| 1415698_at   | 105348 golgi phosphoprotein 2                                                                                                                                 | -4.8 |
| 1436959_x_at | 56876 nasal embryonic LHRH factor                                                                                                                             | -4.8 |
| 1428113_at   | 70551 RIKEN cDNA 4930403J22 gene                                                                                                                              | -4.7 |
| 1416589_at   | 20692 secreted acidic cysteine rich glycoprotein                                                                                                              | -4.7 |
| 1422444_at   | 16403 integrin alpha 6                                                                                                                                        | -4.7 |
| 1423924_s_at | 52588 tetraspanin 14                                                                                                                                          | -4.7 |
| 1417219_s_at | 19240 thymosin, beta 10                                                                                                                                       | -4.7 |
| 1428428_at   | 68758 Williams Beuren syndrome chromosome region 21                                                                                                           | -4.7 |
| 1422837_at   | 64929 sciellin                                                                                                                                                | -4.7 |
| 1424157_at   | 259300 EH-domain containing 2                                                                                                                                 | -4.7 |
| 1453634_a_at | 67397 endoplasmic reticulum protein 29                                                                                                                        | -4.7 |
| 1454671_at   | 231070 insulin induced gene 1                                                                                                                                 | -4.7 |
| 1449303_at   | 75747 sestrin 3                                                                                                                                               | -4.7 |
| 1416155_at   | 15354 high mobility group box 3                                                                                                                               | -4.6 |
| 1417056_at   | 19186 proteasome (prosome, macropain) 28 subunit, alpha                                                                                                       | -4.6 |
| 1426942_at   | 11630 absent in melanoma 1                                                                                                                                    | -4.6 |
| 1418238_at   | 56357 isovaleryl coenzyme A dehydrogenase                                                                                                                     | -4.6 |
| 1423782_at   | 232157 MOB1, Mps One Binder kinase activator-like 1B (yeast)                                                                                                  | -4.6 |
| 1438322_x_at | 14137 farnesyl diphosphate farnesyl transferase 1                                                                                                             | -4.6 |
| 1416838_at   | 17850 methylmalonyl-Coenzyme A mutase                                                                                                                         | -4.6 |
| 1448244_at   | 18777 lysophospholipase 1                                                                                                                                     | -4.6 |
| 1434013_at   | 319713 actin binding LIM protein family, member 3                                                                                                             | -4.6 |
| 1428145_at   | 52538 acetyl-Coenzyme A acyltransferase 2 (mitochondrial 3-oxoacyl-Coenzyme A thiolase)                                                                       | -4.6 |
| 1448129_at   | 67771 actin related protein 2/3 complex, subunit 5                                                                                                            | -4.6 |
| 1428600_at   | 73198 RIKEN cDNA 3110068G20 gene                                                                                                                              | -4.6 |
| 1425616_a_at | 69216 RIKEN cDNA 2410005K17 gene                                                                                                                              | -4.6 |
| 1448967_at   | 66536 nipsnap homolog 3A (C. elegans)                                                                                                                         | -4.6 |
| 1428512_at   | 70237 basic helix-loop-helix domain containing, class B9                                                                                                      | -4.6 |
| 1415760_s_at | 11927 ATX1 (antioxidant protein 1) homolog 1 (yeast)                                                                                                          | -4.5 |
| 1440094_at   | 407795 cDNA sequence BC030870                                                                                                                                 | -4.5 |
| 1416928_at   | 75710 RNA binding motif protein 12                                                                                                                            | -4.5 |
| 1425546_a_at | 22041 transferrin                                                                                                                                             | -4.5 |
| 1452540_a_at | 319179 /// histone 1, H2bc /// histone 1, H2be /// histone 1, H2bl /// histone 1, H2bm /// histone 1, H2bp<br>319185 ///<br>319186 ///<br>319188 ///<br>68024 | -4.5 |
| 1455056_at   | 380928 LIM domain only 7                                                                                                                                      | -4.5 |
| 1424531_a_at | 21401 transcription elongation factor A (SII), 3                                                                                                              | -4.5 |
| 1437471_at   | 217366 leucine rich repeat containing 45                                                                                                                      | -4.5 |
| 1424877_a_at | 17025 aminolevulinate, delta-, dehydratase                                                                                                                    | -4.5 |
| 1428078_at   | 76892 RIKEN cDNA 0610013E23 gene                                                                                                                              | -4.5 |
| 1455195_at   | 20088 ribosomal protein S24                                                                                                                                   | -4.5 |
| 1434613_at   | 69053 RIKEN cDNA 1810013L24 gene                                                                                                                              | -4.5 |
| 1438730_at   | 408054 cDNA sequence BC028801                                                                                                                                 | -4.5 |
| 1417460_at   | 80876 interferon induced transmembrane protein 2                                                                                                              | -4.4 |
| 1424917_a_at | 52639 DNA segment, Chr 11, ERATO Doi 498, expressed                                                                                                           | -4.4 |
| 1428522_at   | 74044 Transcription termination factor, RNA polymerase II                                                                                                     | -4.4 |
| 1450920_at   | 12442 cyclin B2                                                                                                                                               | -4.4 |
| 1440409_at   | 70075 RIKEN cDNA 2210401J11 gene                                                                                                                              | -4.4 |
| 1438402_at   | 269233 RIKEN cDNA 9630050M13 gene                                                                                                                             | -4.4 |
| 1418382_at   | 494504 adenomatous polyposis coli down-regulated 1                                                                                                            | -4.4 |
| 1436756_x_at | 15107 L-3-hydroxyacyl-Coenzyme A dehydrogenase, short chain                                                                                                   | -4.3 |
| 1428256_at   | 69672 RIKEN cDNA 2310047H23 gene                                                                                                                              | -4.3 |
| 1418501_a_at | 170719 oxidation resistance 1                                                                                                                                 | -4.3 |
| 1438542_at   |                                                                                                                                                               | -4.3 |
| 1417178_at   | 54120 GIPC PDZ domain containing family, member 2                                                                                                             | -4.3 |
| 1452213_at   | 21763 testis expressed gene 2                                                                                                                                 | -4.3 |
| 1428707_at   | 69202 RIKEN cDNA 2610009E16 gene                                                                                                                              | -4.3 |
| 1452330_a_at | 74761 matrix-remodelling associated 8                                                                                                                         | -4.3 |

|              |                                                                                                         |      |
|--------------|---------------------------------------------------------------------------------------------------------|------|
| 1460216_at   | 11409 acyl-Coenzyme A dehydrogenase, short chain                                                        | -4.3 |
| 1416860_s_at | 26356 inhibitor of growth family, member 1                                                              | -4.3 |
| 1419821_s_at | 15926 isocitrate dehydrogenase 1 (NADP+), soluble                                                       | -4.3 |
| 1437165_a_at | 18542 procollagen C-proteinase enhancer protein                                                         | -4.3 |
| 1431183_at   | 73467 RIKEN cDNA 1700066M21 gene                                                                        | -4.3 |
| 1433779_at   | 319996 cancer susceptibility candidate 4                                                                | -4.3 |
| 1415718_at   | 50724 RIKEN cDNA 2310079P12 gene                                                                        | -4.3 |
| 1424140_at   | 74246 galactose-4-epimerase, UDP                                                                        | -4.3 |
| 1424828_a_at | 14194 fumarate hydratase 1                                                                              | -4.3 |
| 1428393_at   | 68404 neuritin 1                                                                                        | -4.2 |
| 1428738_a_at | 66039 DNA segment, Chr 14, ERATO Doi 449, expressed                                                     | -4.2 |
| 1437308_s_at | 14062 coagulation factor II (thrombin) receptor                                                         | -4.2 |
| 1433536_at   | 237253 low density lipoprotein receptor-related protein 11                                              | -4.2 |
| 1449056_at   | 243780 RIKEN cDNA E330009J07 gene                                                                       | -4.2 |
| 1451172_at   | 67808 RIKEN cDNA 1200015A19 gene                                                                        | -4.2 |
| 1418817_at   | 67064 chromatin modifying protein 1B                                                                    | -4.2 |
| 1449901_a_at | 53608 mitogen-activated protein kinase kinase kinase 6                                                  | -4.2 |
| 1416364_at   | 15516 heat shock protein 1, beta                                                                        | -4.2 |
| 1417662_at   | 13713 ELK3, member of ETS oncogene family                                                               | -4.1 |
| 1427129_a_at | 74326 heterogeneous nuclear ribonucleoprotein R                                                         | -4.1 |
| 1434987_at   | 11669 aldehyde dehydrogenase 2, mitochondrial                                                           | -4.1 |
| 1417893_at   | 94280 sideroflexin 3                                                                                    | -4.1 |
| 1448559_at   | 14251 flotillin 1                                                                                       | -4.1 |
| 1424542_at   | 20198 S100 calcium binding protein A4                                                                   | -4.1 |
| 1448211_at   | 76252 ATPase, H+ transporting, lysosomal, V0 subunit E isoform 2                                        | -4.1 |
| 1433789_at   | 399101 RNA, U17d small nucleolar                                                                        | -4.1 |
| 1417185_at   | 110454 lymphocyte antigen 6 complex, locus A                                                            | -4.1 |
| 1424616_s_at |                                                                                                         | -4.1 |
| 1428405_at   | 353502 host cell factor C1 regulator 1 (XPO1-dependent)                                                 | -4.1 |
| 1433702_at   | 226090 DNA segment, Chr 19, Wayne State University 12, expressed                                        | -4.1 |
| 1421340_at   | 26408 mitogen activated protein kinase kinase kinase 5                                                  | -4.1 |
| 1425173_s_at | 229593 golgi phosphoprotein 3-like                                                                      | -4.1 |
| 1443099_at   | 432940 Similar to LOC90268 protein                                                                      | -4.1 |
| 1416453_x_at | 20042 /// ribosomal protein S12 /// similar to ribosomal protein S12                                    | -4.0 |
|              | 546370                                                                                                  |      |
| 1416817_at   | 59125 NIMA (never in mitosis gene a)-related expressed kinase 7                                         | -4.0 |
| 1416166_a_at | 53381 peroxiredoxin 4                                                                                   | -4.0 |
| 1422407_s_at | 15461 Harvey rat sarcoma virus oncogene 1                                                               | -4.0 |
| 1455031_at   |                                                                                                         | -4.0 |
| 1452968_at   | 68588 collagen triple helix repeat containing 1                                                         | -4.0 |
| 1416340_a_at | 17159 mannosidase 2, alpha B1                                                                           | -4.0 |
| 1436316_at   | 109249 RIKEN cDNA 9430029L20 gene                                                                       | -4.0 |
| 1434825_at   | 381742 similar to CAGL79                                                                                | -4.0 |
| 1427027_a_at | 66596 general transcription factor III A                                                                | -4.0 |
| 1428218_a_at | 67912 RIKEN cDNA 1600012H06 gene                                                                        | -3.9 |
| 1416375_at   | 544716 /// adaptor-related protein complex 3, mu 1 subunit /// similar to clathrin adaptor protein mu3A | -3.9 |
|              | 55946                                                                                                   |      |
| 1422752_at   | 67005 polymerase (RNA) III (DNA directed) polypeptide K                                                 | -3.9 |
| 1423940_at   | 68090 Yip1 interacting factor homolog (S. cerevisiae)                                                   | -3.9 |
| 1426621_a_at | 72930 protein phosphatase 2 (formerly 2A), regulatory subunit B (PR 52), beta isoform                   | -3.9 |
| 1438055_at   | 109222 retinoic acid receptor responder (tazarotene induced) 1                                          | -3.9 |
| 1426778_at   | 13138 dystroglycan 1                                                                                    | -3.9 |
| 1428795_at   | 76306 RIKEN cDNA 1110021L09 gene                                                                        | -3.9 |
| 1417083_at   | 66212 Sec61 beta subunit                                                                                | -3.9 |
| 1452098_at   | 214901 CTF18, chromosome transmission fidelity factor 18 homolog (S. cerevisiae)                        | -3.9 |
| 1415733_a_at | 68512 RIKEN cDNA 1110019J04 gene                                                                        | -3.9 |
| 1416200_at   | 77125 RIKEN cDNA 9230117N10 gene                                                                        | -3.9 |
| 1416778_at   | 20324 serum deprivation response                                                                        | -3.9 |
| 1420641_a_at | 59010 sulfide quinone reductase-like (yeast)                                                            | -3.9 |
| 1433504_at   | 110078 brain glycogen phosphorylase                                                                     | -3.9 |
| 1418072_at   | 68024 histone 1, H2bc                                                                                   | -3.9 |
| 1420498_a_at | 13132 disabled homolog 2 (Drosophila)                                                                   | -3.9 |
| 1426971_at   | 74153 ubiquitin-activating enzyme E1-like                                                               | -3.9 |
| 1433655_at   |                                                                                                         | -3.9 |
| 1429390_at   | 235534 acid phosphatase-like 2                                                                          | -3.9 |
| 1424118_a_at | 66442 spindle pole body component 25 homolog (S. cerevisiae)                                            | -3.9 |
| 1435982_at   | 100226 syntaxin 12                                                                                      | -3.9 |
| 1456878_at   | 192734 expressed sequence AI646023                                                                      | -3.9 |
| 1422906_at   | 26357 ATP-binding cassette, sub-family G (WHITE), member 2                                              | -3.9 |
| 1448491_at   | 51798 enoyl coenzyme A hydratase 1, peroxisomal                                                         | -3.9 |
| 1428416_at   | 67306 RIKEN cDNA 3110050N22 gene                                                                        | -3.9 |
| 1428821_at   | 67512 1-acylglycerol-3-phosphate O-acyltransferase 2 (lysophosphatidic acid acyltransferase, beta)      | -3.9 |

|              |                                                                                              |      |
|--------------|----------------------------------------------------------------------------------------------|------|
| 1416497_at   | 12304 protein disulfide isomerase associated 4                                               | -3.8 |
| 1451573_a_at | 20909 syntaxin 4A (placental)                                                                | -3.8 |
| 1440559_at   | 15365 high mobility group AT-hook 2, pseudogene 1                                            | -3.8 |
| 1416000_a_at | 18477 peroxiredoxin 1                                                                        | -3.8 |
| 1452374_at   | 218100 zinc finger protein 322a                                                              | -3.8 |
| 1416066_at   | 12527 CD9 antigen                                                                            | -3.8 |
| 1420416_at   | 20346 sema domain, immunoglobulin domain (Ig), short basic domain, secreted, (semaphorin) 3A | -3.8 |
| 1456603_at   | 76566 RIKEN cDNA 1500005K14 gene                                                             | -3.8 |
| 1423364_a_at | 14339 fused toes                                                                             | -3.8 |
| 1424696_at   | 67549 G protein-coupled receptor 89                                                          | -3.8 |
| 1452861_at   | 72097 RIKEN cDNA 2010300C02 gene                                                             | -3.8 |
| 1452887_at   | 74019 TNF receptor-associated factor 3 interacting protein 1                                 | -3.8 |
| 1435413_x_at | 545536 /// RIKEN cDNA 2700060E02 gene /// similar to RIKEN cDNA 2700060E02                   | -3.8 |
|              | 68045                                                                                        |      |
| 1435450_at   | 70568 copine III                                                                             | -3.8 |
| 1453307_a_at | 59008 anaphase-promoting complex subunit 5                                                   | -3.8 |
| 1433626_at   | 235527 phospholipid scramblase 4                                                             | -3.8 |
| 1421821_at   | 16835 low density lipoprotein receptor                                                       | -3.8 |
| 1450886_at   | 14841 germ cell-specific gene 2                                                              | -3.8 |
| 1432494_a_at | 76411 RIKEN cDNA 1700019E19 gene                                                             | -3.8 |
| 1428411_at   | 66602 RIKEN cDNA 1700020I14 gene                                                             | -3.7 |
| 1416158_at   | 11819 nuclear receptor subfamily 2, group F, member 2                                        | -3.7 |
| 1448380_at   | 19039 lectin, galactoside-binding, soluble, 3 binding protein                                | -3.7 |
| 1435649_at   | 68810 nexilin                                                                                | -3.7 |
| 1447483_s_at | 72091 RIKEN cDNA 2610002F03 gene                                                             | -3.7 |
| 1416946_a_at | 113868 /// acetyl-Coenzyme A acyltransferase 1 /// 3-ketoacyl-CoA thiolase B                 | -3.7 |
|              | 235674                                                                                       |      |
| 1417147_at   | 56279 RIKEN cDNA B230317C12 gene                                                             | -3.7 |
| 1448238_at   | 68045 RIKEN cDNA 2700060E02 gene                                                             | -3.7 |
| 1435323_a_at | 218121 O-acyltransferase (membrane bound) domain containing 1                                | -3.7 |
| 1438118_x_at | 22352 vimentin                                                                               | -3.7 |
| 1432202_a_at | 70235 WD repeat domain 51A                                                                   | -3.7 |
| 1423723_s_at | 230908 TAR DNA binding protein                                                               | -3.7 |
| 1423121_at   | 15925 insulin degrading enzyme                                                               | -3.7 |
| 1428322_a_at | 68342 NADH dehydrogenase (ubiquinone) 1 beta subcomplex, 10                                  | -3.7 |
| 1435464_at   | 68552 RIKEN cDNA 1110003E01 gene                                                             | -3.7 |
| 1437290_at   | 242291 RIKEN cDNA 1110001C20 gene                                                            | -3.6 |
| 1454658_at   | 216136 ilvB (bacterial acetolactate synthase)-like                                           | -3.6 |
| 1418318_at   | 66889 ring finger protein 128                                                                | -3.6 |
| 1436121_a_at | 67711 non-SMC element 1 homolog (S. cerevisiae)                                              | -3.6 |
| 1417777_at   | 67103 leukotriene B4 12-hydroxydehydrogenase                                                 | -3.6 |
| 1423463_a_at | 51944 DNA segment, Chr 2, ERATO Doi 750, expressed                                           | -3.6 |
| 1424438_a_at | 230514 leptin receptor overlapping transcript                                                | -3.6 |
| 1460603_at   | 209086 sterile alpha motif domain containing 9-like                                          | -3.6 |
| 1417913_at   | 109145 RIKEN cDNA 2810037C03 gene                                                            | -3.6 |
| 1460214_at   | 18546 Purkinje cell protein 4                                                                | -3.6 |
| 1424786_s_at | 54636 WD repeat domain 45                                                                    | -3.5 |
| 1437829_s_at | 13631 eukaryotic elongation factor-2 kinase                                                  | -3.5 |
| 1426269_at   | 20955 synaptobrevin like 1                                                                   | -3.5 |
| 1435617_at   | 106606 expressed sequence AI480743                                                           | -3.5 |
| 1416988_at   | 17685 mutS homolog 2 (E. coli)                                                               | -3.5 |
| 1434312_at   | 104877 expressed sequence AI788669                                                           | -3.5 |
| 1428065_at   | 68682 RIKEN cDNA 1110028E10 gene                                                             | -3.5 |
| 1434549_at   | 53869 RAB11a, member RAS oncogene family                                                     | -3.5 |
| 1435666_at   | 234385 microtubule associated serine/threonine kinase 3                                      | -3.5 |
| 1450862_at   | 19366 RAD54 like (S. cerevisiae)                                                             | -3.5 |
| 1422603_at   | 58809 ribonuclease, RNase A family 4                                                         | -3.5 |
| 1423370_a_at | 103236 casein kinase 1, gamma 2                                                              | -3.5 |
| 1434891_at   | 19221 prostaglandin F2 receptor negative regulator                                           | -3.5 |
| 1452919_a_at | 67078 RIKEN cDNA 1700012G19 gene                                                             | -3.5 |
| 1422432_at   | 13167 diazepam binding inhibitor                                                             | -3.5 |
| 1423864_at   | 192292 nuclear receptor binding protein                                                      | -3.5 |
| 1417985_at   | 67122 Notch-regulated ankyrin repeat protein                                                 | -3.4 |
| 1424106_at   | 104771 RIKEN cDNA 1200003C05 gene                                                            | -3.4 |
| 1421819_a_at | 56086 SET translocation                                                                      | -3.4 |
| 1426306_a_at | 80884 melanoma antigen, family D, 2                                                          | -3.4 |
| 1460674_at   | 71904 progesterin and adipoQ receptor family member VII                                      | -3.4 |
| 1451356_at   | 66471 acidic (leucine-rich) nuclear phosphoprotein 32 family, member E                       | -3.4 |
| 1452346_at   | 108902 UDP-GlcNAc:betaGal beta-1,3-N-acetylglucosaminyltransferase 6                         | -3.4 |
| 1423591_at   | 67529 FGFR1 oncogene partner 2                                                               | -3.4 |
| 1454893_at   | 68521 RIKEN cDNA 1110013L07 gene                                                             | -3.4 |
| 1416032_at   | 68539 RIKEN cDNA 1110006I15 gene                                                             | -3.4 |

|              |                                                                                                         |      |
|--------------|---------------------------------------------------------------------------------------------------------|------|
| 1416759_at   | 171580 microtubule associated monooxygenase, calponin and LIM domain containing 1                       | -3.4 |
| 1423717_at   | 56248 adenylate kinase 3                                                                                | -3.4 |
| 1416372_at   | 19210 phosphatidylserine synthase 1                                                                     | -3.4 |
| 1416667_at   | 13595 phenylalkylamine Ca <sup>2+</sup> antagonist (emopamil) binding protein                           | -3.4 |
| 1448592_at   | 56693 cartilage associated protein                                                                      | -3.4 |
| 1460718_s_at | 56462 mitochondrial carrier homolog 1 (C. elegans)                                                      | -3.4 |
| 1417450_a_at | 21335 transforming, acidic coiled-coil containing protein 3                                             | -3.4 |
| 1452754_at   | 76737 RIKEN cDNA 5730592L21 gene                                                                        | -3.4 |
| 1421935_at   | 67427 ribosomal protein S20                                                                             | -3.3 |
| 1423151_at   | 67838 DnaJ (Hsp40) homolog, subfamily B, member 11                                                      | -3.3 |
| 1438429_at   | 72505 RIKEN cDNA 2610319H10 gene                                                                        | -3.3 |
| 1415753_at   | 216169 DNA segment, Chr 10, Brigham & Women's Genetics 1364 expressed                                   | -3.3 |
| 1423119_at   | 66832 radial spokehead-like 2                                                                           | -3.3 |
| 1428718_at   | 69938 secernin 1                                                                                        | -3.3 |
| 1419582_at   | 72082 cytochrome P450, family 2, subfamily c, polypeptide 55                                            | -3.3 |
| 1434554_at   | 68729 tripartite motif protein 37                                                                       | -3.3 |
| 1457588_at   | 97124 expressed sequence C76213                                                                         | -3.3 |
| 1429063_s_at | 16558 kinesin family member 16B                                                                         | -3.3 |
| 1442540_at   | 96961 expressed sequence C77609                                                                         | -3.3 |
| 1448919_at   | 66205 CD302 antigen                                                                                     | -3.3 |
| 1429189_at   | 71784 RIKEN cDNA 1110007C02 gene                                                                        | -3.3 |
| 1418496_at   | 15375 forkhead box A1                                                                                   | -3.3 |
| 1449348_at   | 56524 membrane protein, palmitoylated 6 (MAGUK p55 subfamily member 6)                                  | -3.3 |
| 1423334_at   | 67458 RIKEN cDNA 1200007D18 gene                                                                        | -3.3 |
| 1415864_at   | 12183 2,3-bisphosphoglycerate mutase                                                                    | -3.3 |
| 1423218_a_at | 18120 mitochondrial ribosomal protein L49                                                               | -3.3 |
| 1428351_at   | 67905 protein phosphatase 1M                                                                            | -3.3 |
| 1448705_at   | 81630 zinc finger protein 297                                                                           | -3.3 |
| 1448960_at   | 67393 CXXC finger 5                                                                                     | -3.3 |
| 1421871_at   | 56726 SH3-binding domain glutamic acid-rich protein like                                                | -3.3 |
| 1426880_at   | 208618 cDNA sequence BC026657                                                                           | -3.3 |
| 1415855_at   | 17311 kit ligand                                                                                        | -3.2 |
| 1424813_at   | 105428 /// expressed sequence AA536717 /// hypothetical protein LOC218805                               | -3.2 |
|              | 218805                                                                                                  |      |
| 1455685_at   | 330631 hypothetical protein 9530064J02                                                                  | -3.2 |
| 1419360_a_at | 268996 synovial sarcoma translocation, Chromosome 18                                                    | -3.2 |
| 1422502_at   | 11545 poly (ADP-ribose) polymerase family, member 1                                                     | -3.2 |
| 1455058_at   | 210376 myotubularin related protein 9                                                                   | -3.2 |
| 1448956_at   | 56018 START domain containing 10                                                                        | -3.2 |
| 1428636_at   | 74051 six transmembrane epithelial antigen of prostate 2                                                | -3.2 |
| 1427346_at   | 18422 /// ovary testis transcribed /// similar to Ott protein                                           | -3.2 |
|              | 382243                                                                                                  |      |
| 1435802_at   | 232879 gene model 157, (NCBI)                                                                           | -3.2 |
| 1455562_at   | 20667 SRY-box containing gene 12                                                                        | -3.2 |
| 1428694_at   | 75957 RIKEN cDNA 5033413D16 gene                                                                        | -3.2 |
| 1422438_at   | 13849 epoxide hydrolase 1, microsomal                                                                   | -3.2 |
| 1415727_at   | 246703 apolipoprotein A-I binding protein                                                               | -3.2 |
| 1423319_at   | 15242 hematopoietically expressed homeobox                                                              | -3.2 |
| 1426246_at   | 19128 protein S (alpha)                                                                                 | -3.2 |
| 1426387_x_at | 236604 /// RIKEN cDNA 4933439C20 gene /// phosphatidylserine decarboxylase                              | -3.2 |
|              | 320951                                                                                                  |      |
| 1428431_at   | 71918 RIKEN cDNA 2310047A01 gene                                                                        | -3.2 |
| 1416041_at   | 20393 serum/glucocorticoid regulated kinase                                                             | -3.2 |
| 1419259_at   | 20163 Ras suppressor protein 1                                                                          | -3.2 |
| 1452680_at   | 107686 small nuclear ribonucleoprotein D2                                                               | -3.2 |
| 1423767_at   | 66310 RIKEN cDNA 2810410M20 gene                                                                        | -3.2 |
| 1426253_at   | 66768 RIKEN cDNA 4933428G09 gene                                                                        | -3.2 |
| 1424394_at   | 114679 selenoprotein M                                                                                  | -3.2 |
| 1426628_at   | 234463 transmembrane protein 34                                                                         | -3.2 |
| 1434027_at   | 53902 Down syndrome critical region gene 1-like 2                                                       | -3.2 |
| 1428382_at   | 68094 SWI/SNF related, matrix associated, actin dependent regulator of chromatin, subfamily c, member 2 | -3.2 |
|              |                                                                                                         |      |
| 1429458_at   | 67383 RIKEN cDNA 2410127L17 gene                                                                        | -3.2 |
| 1439050_at   | 99692 expressed sequence AI649393                                                                       | -3.2 |
| 1415812_at   | 227753 gelsolin                                                                                         | -3.2 |
| 1416269_at   | 57423 ATP synthase, H <sup>+</sup> transporting, mitochondrial F0 complex, subunit f, isoform 2         | -3.2 |
| 1420696_at   | 20348 sema domain, immunoglobulin domain (Ig), short basic domain, secreted, (semaphorin) 3C            | -3.2 |
| 1421832_at   | 65960 twisted gastrulation homolog 1 (Drosophila)                                                       | -3.2 |
| 1427074_at   | 245867 RIKEN cDNA 5330414D10 gene                                                                       | -3.2 |
| 1452654_at   | 70546 zinc finger, DHHC domain containing 2                                                             | -3.2 |
| 1420668_a_at | 74766 Yip1 domain family, member 2                                                                      | -3.1 |
| 1426571_at   | 101772 transmembrane protein 16A                                                                        | -3.1 |

|              |                                                                                                              |      |
|--------------|--------------------------------------------------------------------------------------------------------------|------|
| 1451277_at   | 225791 zinc binding alcohol dehydrogenase, domain containing 2                                               | -3.1 |
| 1434365_a_at | 381306 similar to hypothetical protein FLJ10706                                                              | -3.1 |
| 1417090_at   | 19672 reticulocalbin 1                                                                                       | -3.1 |
| 1418839_at   | 170823 glomulin, FKBP associated protein                                                                     | -3.1 |
| 1421534_at   |                                                                                                              | -3.1 |
| 1426710_at   | 12315 calmodulin 3                                                                                           | -3.1 |
| 1426716_at   | 100121 tudor domain containing 7                                                                             | -3.1 |
| 1416967_at   | 20674 SRY-box containing gene 2                                                                              | -3.1 |
| 1424707_at   | 68581 RIKEN cDNA 1110014C03 gene                                                                             | -3.1 |
| 1417027_at   | 80890 tripartite motif protein 2                                                                             | -3.1 |
| 1417311_at   | 68337 cysteine rich protein 2                                                                                | -3.1 |
| 1424782_at   | 67171 RIKEN cDNA 2610318G18 gene                                                                             | -3.1 |
| 1433954_at   | 74038 RIKEN cDNA 4632419I22 gene                                                                             | -3.1 |
| 1420810_at   | 56398 RIKEN cDNA 1500003O03 gene                                                                             | -3.1 |
| 1432264_x_at | 20463 cytochrome c oxidase subunit VIIa polypeptide 2-like                                                   | -3.1 |
| 1416258_at   | 21877 thymidine kinase 1                                                                                     | -3.1 |
| 1416288_at   | 15502 DnaJ (Hsp40) homolog, subfamily A, member 1                                                            | -3.1 |
| 1416607_at   | 70984 RIKEN cDNA 4931406C07 gene                                                                             | -3.1 |
| 1416803_at   | 14231 FK506 binding protein 7                                                                                | -3.1 |
| 1426098_a_at | 12380 calpastatin                                                                                            | -3.1 |
| 1428573_at   | 69993 chimerin (chimaerin) 2                                                                                 | -3.1 |
| 1449481_at   | 50799 solute carrier family 25 (mitochondrial carrier, adenine nucleotide translocator), member 13           | -3.1 |
| 1423650_at   | 545856 similar to Rnf26 protein                                                                              | -3.1 |
| 1438948_x_at | 12257 benzodiazepine receptor, peripheral                                                                    | -3.1 |
| 1451103_at   | 219072 DNA segment, Chr 14, ERATO Doi 500, expressed                                                         | -3.1 |
| 1459274_at   | Transcribed locus                                                                                            | -3.1 |
| 1416412_at   | 18201 neutral sphingomyelinase (N-SMase) activation associated factor                                        | -3.1 |
| 1422271_at   | 19065 pancreatic polypeptide receptor 1                                                                      | -3.1 |
| 1441272_at   | 17184 Matrin 3                                                                                               | -3.1 |
| 1430053_a_at | 67059 RIKEN cDNA 2810409H07 gene                                                                             | -3.1 |
| 1449151_at   | 18557 PCTAIRE-motif protein kinase 3                                                                         | -3.1 |
| 1448279_at   | 56378 actin related protein 2/3 complex, subunit 3                                                           | -3.0 |
| 1434696_at   | 245866 cDNA sequence BC037708                                                                                | -3.0 |
| 1437403_at   | 320825 RIKEN cDNA E130306M17 gene                                                                            | -3.0 |
| 1421654_a_at | 16905 lamin A                                                                                                | -3.0 |
| 1422465_a_at | 18230 nucleoredoxin                                                                                          | -3.0 |
| 1422516_a_at | 58249 fibroblast growth factor (acidic) intracellular binding protein                                        | -3.0 |
| 1428604_at   | 112422 RIKEN cDNA 2610305D13 gene                                                                            | -3.0 |
| 1419552_at   | 52665 enoyl Coenzyme A hydratase domain containing 1                                                         | -3.0 |
| 1423071_x_at | 68157 RIKEN cDNA 6720475J19 gene                                                                             | -3.0 |
| 1437632_at   | Transcribed locus                                                                                            | -3.0 |
| 1423804_a_at | 319554 isopentenyl-diphosphate delta isomerase                                                               | -3.0 |
| 1428407_at   | 544935 /// heterogeneous nuclear ribonucleoprotein A0 /// similar to heterogeneous nuclear ribonucleoprotein | -3.0 |
|              | 77134 A0                                                                                                     |      |
| 1433819_s_at | 28169 1-acylglycerol-3-phosphate O-acyltransferase 3                                                         | -3.0 |
| 1418672_at   | 27384 aldo-keto reductase family 1, member C13                                                               | -3.0 |
| 1423300_at   | 66980 zinc finger, DHHC domain containing 6                                                                  | -3.0 |
| 1423790_at   | 223453 death-associated protein                                                                              | -3.0 |
| 1419164_at   | 26466 zinc finger protein 260                                                                                | -3.0 |
| 1415756_a_at | 20615 SNAP-associated protein                                                                                | -3.0 |
| 1416101_a_at | 50708 histone 1, H1c                                                                                         | -3.0 |
| 1424198_at   | 71228 discs, large homolog 5 (Drosophila)                                                                    | -3.0 |
| 1434386_at   | 235574 ATPase, Ca <sup>++</sup> -sequestering                                                                | -3.0 |
| 1435384_at   | 93765 ubiquitin-conjugating enzyme E2N                                                                       | -3.0 |
| 1419635_at   | 67392 RIKEN cDNA 4833420G17 gene                                                                             | -3.0 |
| 1417114_at   | 23885 germ cell-less homolog (Drosophila)                                                                    | -2.9 |
| 1417430_at   | 12585 cerebellar degeneration-related 2                                                                      | -2.9 |
| 1430012_at   | 68790 RIKEN cDNA 1110050K14 gene                                                                             | -2.9 |
| 1416137_at   | 11750 annexin A7                                                                                             | -2.9 |
| 1418737_at   | 66401 nudix (nucleoside diphosphate linked moiety X)-type motif 2                                            | -2.9 |
| 1419031_at   | 56473 fatty acid desaturase 2                                                                                | -2.9 |
| 1456077_x_at |                                                                                                              | -2.9 |
| 1427094_at   | 18974 polymerase (DNA directed), epsilon 2 (p59 subunit)                                                     | -2.9 |
| 1436448_a_at | 19224 prostaglandin-endoperoxide synthase 1                                                                  | -2.9 |
| 1438610_a_at | 12972 Crystallin, zeta                                                                                       | -2.9 |
| 1448286_at   | 15108 hydroxyacyl-Coenzyme A dehydrogenase type II                                                           | -2.9 |
| 1460676_at   | 74158 RIKEN cDNA 1300006C06 gene                                                                             | -2.9 |
| 1417272_at   | 68303 RIKEN cDNA 9130005N14 gene                                                                             | -2.9 |
| 1425323_a_at | 214917 cDNA sequence BC008155                                                                                | -2.9 |
| 1428580_at   | 109778 biliverdin reductase A                                                                                | -2.9 |
| 1416068_at   | 85305 lysyl-tRNA synthetase                                                                                  | -2.9 |
| 1423960_at   | 14792 gene rich cluster, C3f gene                                                                            | -2.9 |



|              |                                                                                                                                        |      |
|--------------|----------------------------------------------------------------------------------------------------------------------------------------|------|
| 1428853_at   | 19206 patched homolog 1                                                                                                                | -2.9 |
| 1434705_at   | 13017 C-terminal binding protein 2                                                                                                     | -2.9 |
| 1435870_at   | 20962 Synaptonemal complex protein 3                                                                                                   | -2.9 |
| 1448810_at   | 50798 glucosamine                                                                                                                      | -2.9 |
| 1417203_at   | 66071 ethylmalonic encephalopathy 1                                                                                                    | -2.9 |
| 1418327_at   | 68002 RIKEN cDNA 1110058L19 gene                                                                                                       | -2.9 |
| 1426160_a_at | 20872 serine/threonine kinase 16                                                                                                       | -2.9 |
| 1417373_a_at | 22145 tubulin, alpha 4                                                                                                                 | -2.9 |
| 1424160_at   | 66248 asparagine-linked glycosylation 5 homolog (yeast, dolichyl-phosphate beta-glucosyltransferase)                                   | -2.9 |
| 1424829_at   | 227612 RIKEN cDNA A830007P12 gene                                                                                                      | -2.9 |
| 1455288_at   | 66180 RIKEN cDNA 1110036O03 gene                                                                                                       | -2.9 |
| 1431322_at   | 78908 immunoglobulin superfamily, member 3                                                                                             | -2.9 |
| 1424884_at   | 30050 F-box and WD-40 domain protein 2                                                                                                 | -2.9 |
| 1420873_at   | 19230 protein tyrosine kinase 9                                                                                                        | -2.8 |
| 1435524_at   | 69895 RIKEN cDNA 2010109N14 gene                                                                                                       | -2.8 |
| 1450105_at   |                                                                                                                                        | -2.8 |
| 1436518_at   | 69727 ubiquitin specific protease 46                                                                                                   | -2.8 |
| 1416657_at   | 11651 thymoma viral proto-oncogene 1                                                                                                   | -2.8 |
| 1422000_at   | 27383 aldo-keto reductase family 1, member C12                                                                                         | -2.8 |
| 1416882_at   | 67865 regulator of G-protein signalling 10                                                                                             | -2.8 |
| 1420365_a_at | 53379 heterogeneous nuclear ribonucleoprotein A2/B1                                                                                    | -2.8 |
| 1451726_at   | 219135 myotubularin related protein 6                                                                                                  | -2.8 |
| 1428180_at   | 75620 RIKEN cDNA 2810422J05 gene                                                                                                       | -2.8 |
| 1415719_s_at | 74252 armadillo repeat containing 1                                                                                                    | -2.8 |
| 1450355_a_at | 12332 capping protein (actin filament), gelsolin-like                                                                                  | -2.8 |
| 1447819_x_at |                                                                                                                                        | -2.8 |
| 1416109_at   | 71665 fucosidase, alpha-L- 1, tissue                                                                                                   | -2.8 |
| 1423423_at   | 14827 protein disulfide isomerase associated 3                                                                                         | -2.8 |
| 1423394_at   | 66881 prenylcysteine oxidase 1                                                                                                         | -2.8 |
| 1418906_at   | 26425 nucleotide binding protein 1                                                                                                     | -2.8 |
| 1423347_at   | 20334 SEC23A (S. cerevisiae)                                                                                                           | -2.8 |
| 1418031_at   | 17925 myosin IXb                                                                                                                       | -2.8 |
| 1426760_at   | 320727 importin 8                                                                                                                      | -2.8 |
| 1449163_at   | 24058 expressed sequence AI256711                                                                                                      | -2.8 |
| 1434828_at   | 329739 RIKEN cDNA B430201A12 gene                                                                                                      | -2.8 |
| 1423706_a_at | 110208 phosphogluconate dehydrogenase                                                                                                  | -2.8 |
| 1454753_at   | 108657 arginyl aminopeptidase (aminopeptidase B)-like 1                                                                                | -2.8 |
| 1433542_at   | 101490 inositol polyphosphate-5-phosphatase F                                                                                          | -2.8 |
| 1436019_a_at | 245828 trafficking protein particle complex 1                                                                                          | -2.7 |
| 1451602_at   | 72183 sorting nexin 6                                                                                                                  | -2.7 |
| 1433735_a_at | 100201 RIKEN cDNA 9630015D15 gene                                                                                                      | -2.7 |
| 1415943_at   | 20969 syndecan 1                                                                                                                       | -2.7 |
| 1417445_at   | 67052 kinetochore associated 2                                                                                                         | -2.7 |
| 1418818_at   | 11830 aquaporin 5                                                                                                                      | -2.7 |
| 1420628_at   | 19290 /// purine rich element binding protein A /// RIKEN cDNA 6330411E07 gene                                                         | -2.7 |
|              | 70733                                                                                                                                  |      |
| 1460319_at   | 53618 fucosyltransferase 8                                                                                                             | -2.7 |
| 1415796_at   | 23994 DAZ associated protein 2                                                                                                         | -2.7 |
| 1416431_at   | 67951 tubulin, beta 6                                                                                                                  | -2.7 |
| 1421997_s_at | 16400 integrin alpha 3                                                                                                                 | -2.7 |
| 1452592_at   | 211666 microsomal glutathione S-transferase 2                                                                                          | -2.7 |
| 1416135_at   | 11792 apurinic/aprimidinic endonuclease 1                                                                                              | -2.7 |
| 1424906_at   | 217430 RIKEN cDNA E030024M05 gene                                                                                                      | -2.7 |
| 1430656_a_at | 70396 RIKEN cDNA 2210409M21 gene                                                                                                       | -2.7 |
| 1452367_at   | 107684 coronin, actin binding protein 2A                                                                                               | -2.7 |
| 1428408_a_at | 52635 DNA segment, Chr 12, ERATO Doi 551, expressed                                                                                    | -2.7 |
| 1436534_at   | 20822 Sjogren syndrome antigen A2                                                                                                      | -2.7 |
| 1416908_s_at | 22099 translin                                                                                                                         | -2.7 |
| 1418296_at   | 18301 FXD domain-containing ion transport regulator 5                                                                                  | -2.7 |
| 1419027_s_at | 56356 glycolipid transfer protein                                                                                                      | -2.7 |
| 1420427_a_at | 101437 DEAH (Asp-Glu-Ala-His) box polypeptide 32                                                                                       | -2.7 |
| 1436716_at   | Transcribed locus, strongly similar to XP_370630.2 PREDICTED: protein phosphatase 1, regulatory (inhibitor) subunit 14B [Homo sapiens] | -2.7 |
| 1426682_at   | 104625 CCR4-NOT transcription complex, subunit 6                                                                                       | -2.7 |
| 1433620_at   |                                                                                                                                        | -2.7 |
| 1416468_at   | 11668 aldehyde dehydrogenase family 1, subfamily A1                                                                                    | -2.7 |
| 1427447_a_at | 110253 TRIO and F-actin binding protein                                                                                                | -2.7 |
| 1416529_at   | 13730 epithelial membrane protein 1                                                                                                    | -2.7 |
| 1417825_at   | 13885 esterase D/formylglutathione hydrolase                                                                                           | -2.7 |
| 1418532_at   | 57265 frizzled homolog 2 (Drosophila)                                                                                                  | -2.6 |
| 1423599_a_at | 67466 phosducin-like                                                                                                                   | -2.6 |

|              |                                                                                                                                                       |      |
|--------------|-------------------------------------------------------------------------------------------------------------------------------------------------------|------|
| 1424895_at   | 76123 G-protein signalling modulator 2 (AGS3-like, <i>C. elegans</i> )                                                                                | -2.6 |
| 1426434_at   | 74122 transmembrane protein 43                                                                                                                        | -2.6 |
| 1429456_a_at | 26939 polymerase (RNA) III (DNA directed) polypeptide E                                                                                               | -2.6 |
| 1433951_at   | 75423 ADP-ribosylation factor-like 5                                                                                                                  | -2.6 |
| 1450981_at   | 12798 calponin 2                                                                                                                                      | -2.6 |
| 1460737_at   | 18518 immunoglobulin (CD79A) binding protein 1                                                                                                        | -2.6 |
| 1417245_at   | 58245 RIKEN cDNA E130016I23 gene                                                                                                                      | -2.6 |
| 1417633_at   | 20657 superoxide dismutase 3, extracellular                                                                                                           | -2.6 |
| 1421313_s_at | 13043 cortactin                                                                                                                                       | -2.6 |
| 1450431_a_at | 17999 neural precursor cell expressed, developmentally down-regulted gene 4                                                                           | -2.6 |
| 1420930_s_at | 54366 catenin (cadherin associated protein), alpha-like 1                                                                                             | -2.6 |
| 1423130_a_at | 20384 splicing factor, arginine/serine-rich 5 (SRp40, HRS)                                                                                            | -2.6 |
| 1449145_a_at | 12389 caveolin, caveolae protein 1                                                                                                                    | -2.6 |
| 1424005_at   | 78521 RIKEN cDNA B230219D22 gene                                                                                                                      | -2.6 |
| 1428608_at   | 67938 myosin light chain, regulatory B                                                                                                                | -2.6 |
| 1448647_at   | 17158 mannosidase 2, alpha 1                                                                                                                          | -2.6 |
| 1448894_at   | 14187 aldo-keto reductase family 1, member B8                                                                                                         | -2.6 |
| 1435083_at   | 330695 cortixin                                                                                                                                       | -2.6 |
| 1439965_at   | Transcribed locus                                                                                                                                     | -2.6 |
| 1415964_at   | 20249 stearoyl-Coenzyme A desaturase 1                                                                                                                | -2.6 |
| 1430533_a_at | 12387 catenin (cadherin associated protein), beta 1, 88kDa                                                                                            | -2.6 |
| 1435076_at   | 116972 RIKEN cDNA 2310047D13 gene                                                                                                                     | -2.6 |
| 1424562_a_at | 11739 solute carrier family 25 (mitochondrial carrier, adenine nucleotide translocator), member 4                                                     | -2.6 |
| 1451066_at   | 77582 leukocyte receptor cluster (LRC) member 4                                                                                                       | -2.6 |
| 1416407_at   | 18611 phosphoprotein enriched in astrocytes 15                                                                                                        | -2.6 |
| 1418671_at   | 12337 calpain 5                                                                                                                                       | -2.6 |
| 1423570_at   | 11307 ATP-binding cassette, sub-family G (WHITE), member 1                                                                                            | -2.6 |
| 1418704_at   | 20196 S100 calcium binding protein A13                                                                                                                | -2.6 |
| 1426774_at   | 243771 poly (ADP-ribose) polymerase family, member 12                                                                                                 | -2.6 |
| 1426848_at   | 99683 SEC24 related gene family, member B ( <i>S. cerevisiae</i> )                                                                                    | -2.6 |
| 1428270_at   | 76485 glycosyltransferase 8 domain containing 1                                                                                                       | -2.6 |
| 1447754_x_at | 67026 THAP domain containing 4                                                                                                                        | -2.6 |
| 1418066_at   | 12632 cofilin 2, muscle                                                                                                                               | -2.6 |
| 1423567_a_at | 26444 proteasome (prosome, macropain) subunit, alpha type 7                                                                                           | -2.6 |
| 1450409_a_at | 67739 RIKEN cDNA 4930570C03 gene                                                                                                                      | -2.6 |
| 1451175_at   | 76687 signal peptidase complex subunit 3 homolog ( <i>S. cerevisiae</i> )                                                                             | -2.6 |
| 1452111_at   | 232536 mitochondrial ribosomal protein S35                                                                                                            | -2.6 |
| 1418996_a_at | 67636 RIKEN cDNA 4930469P12 gene                                                                                                                      | -2.6 |
| 1452147_at   | 218811 SEC24 related gene family, member C ( <i>S. cerevisiae</i> )                                                                                   | -2.6 |
| 1428140_at   | 67041 3-oxoacid CoA transferase 1                                                                                                                     | -2.5 |
| 1455538_at   | 109169 RIKEN cDNA 6330403M23 gene                                                                                                                     | -2.5 |
| 1451218_at   | 192193 ER degradation enhancer, mannosidase alpha-like 1                                                                                              | -2.5 |
| 1427990_at   | 77593 ubiquitin specific protease 45                                                                                                                  | -2.5 |
| 1434748_at   | 80986 cytoskeleton associated protein 2                                                                                                               | -2.5 |
| 1416503_at   | 17035 latexin                                                                                                                                         | -2.5 |
| 1417911_at   | 12428 cyclin A2                                                                                                                                       | -2.5 |
| 1421876_at   | 26420 mitogen activated protein kinase 9                                                                                                              | -2.5 |
| 1423701_at   | 71743 Coenzyme A synthase                                                                                                                             | -2.5 |
| 1424186_at   | 67896 RIKEN cDNA 2610001E17 gene                                                                                                                      | -2.5 |
| 1433530_at   | 70164 RIKEN cDNA 2210411K19 gene                                                                                                                      | -2.5 |
| 1423746_at   | 105245 thioredoxin domain containing 5                                                                                                                | -2.5 |
| 1425542_a_at | 26931 protein phosphatase 2, regulatory subunit B (B56), gamma isoform                                                                                | -2.5 |
| 1445626_at   | 16854 Lectin, galactose binding, soluble 3                                                                                                            | -2.5 |
| 1415906_at   | 19241 thymosin, beta 4, X chromosome                                                                                                                  | -2.5 |
| 1417470_at   | 80287 apolipoprotein B editing complex 3                                                                                                              | -2.5 |
| 1428325_at   | 66455 RIKEN cDNA 2610019P18 gene                                                                                                                      | -2.5 |
| 1417378_at   |                                                                                                                                                       | -2.5 |
| 1423680_at   | 76267 fatty acid desaturase 1                                                                                                                         | -2.5 |
| 1416260_a_at | 56440 sorting nexin 1                                                                                                                                 | -2.4 |
| 1437133_x_at | 11677 /// aldo-keto reductase family 1, member B3 (aldose reductase) /// similar to Aldo-keto reductase family 432549 1, member B3 (aldose reductase) | -2.4 |
| 1439790_at   | Transcribed locus                                                                                                                                     | -2.4 |
| 1420835_at   | 67554 solute carrier family 25, member 30                                                                                                             | -2.4 |
| 1451015_at   | 21881 transketolase                                                                                                                                   | -2.4 |
| 1417399_at   | 14456 growth arrest specific 6                                                                                                                        | -2.4 |
| 1429053_at   | 68617 RIKEN cDNA 1110012J17 gene                                                                                                                      | -2.4 |
| 1423097_s_at | 12339 calpain 7                                                                                                                                       | -2.3 |
| 1427296_at   | 218236 cDNA sequence BC010304                                                                                                                         | -2.3 |
| 1417161_at   | 52004 CDK2-associated protein 2                                                                                                                       | -2.3 |
| 1451176_at   | 228607 RIKEN cDNA D430028G21 gene                                                                                                                     | -2.3 |
| 1424661_at   | 66865 peptidase (mitochondrial processing) alpha                                                                                                      | -2.3 |
| 1433481_at   | 231997 FK506 binding protein 14                                                                                                                       | -2.3 |

|              |                                             |      |
|--------------|---------------------------------------------|------|
| 1416209_at   | 14661 glutamate dehydrogenase 1             | -2.3 |
| 1417376_a_at | 54725 immunoglobulin superfamily, member 4A | -2.2 |
| 1452942_at   | 74868 RIKEN cDNA 4930438D12 gene            | -2.2 |
| 1416091_at   | 17758 microtubule-associated protein 4      | -2.2 |
| 1423675_at   | 230484 ubiquitin specific protease 1        | -2.1 |
| 1433645_at   | 70174 RIKEN cDNA 2210409B22 gene            | -2.1 |
