# Supplementary material
Source: PubMed Central journal article supplement (PMC2393758)
Supplement: pnas_0800668105_12.pdf [file pnas_0800668105_12.pdf]

Table 7. Differentially expressed mGEP transcripts after a 24h infection with the cancer-associated Kx2 isolate.

| Upregulated transcripts |         |                                                                                    |                                          |
|-------------------------|---------|------------------------------------------------------------------------------------|------------------------------------------|
| Affymetrix probe set ID | Gene ID | Gene description                                                                   | Fold change compared to uninfected mGEPs |
| 1427429_at              | 12981   | colony stimulating factor 2 (granulocyte-macrophage)                               | 960.9                                    |
| 1427747_a_at            | 16819   | lipocalin 2                                                                        | 487.3                                    |
| 1421228_at              | 20306   | chemokine (C-C motif) ligand 7                                                     | 233.9                                    |
| 1422029_at              | 20297   | chemokine (C-C motif) ligand 20                                                    | 196.5                                    |
| 1450826_a_at            | 20210   | serum amyloid A 3                                                                  | 111.7                                    |
| 1419728_at              | 20311   | chemokine (C-X-C motif) ligand 5                                                   | 100.1                                    |
| 1449984_at              | 20310   | chemokine (C-X-C motif) ligand 2                                                   | 79.2                                     |
| 1423954_at              | 12266   | complement component 3                                                             | 67.8                                     |
| 1460722_at              | 223920  | sterol O-acyltransferase 2                                                         | 56.0                                     |
| 1420380_at              | 20296   | chemokine (C-C motif) ligand 2                                                     | 53.2                                     |
| 1450297_at              | 16193   | interleukin 6                                                                      | 48.0                                     |
| 1449591_at              | 12363   | caspase 11, apoptosis-related cysteine protease                                    | 44.0                                     |
| 1419529_at              | 83430   | interleukin 23, alpha subunit p19                                                  | 36.0                                     |
| 1434015_at              | 227659  | solute carrier family 2 (facilitated glucose transporter), member 6                | 31.8                                     |
| 1419209_at              | 14825   | chemokine (C-X-C motif) ligand 1                                                   | 28.6                                     |
| 1460251_at              | 14102   | Fas (TNF receptor superfamily member)                                              | 28.0                                     |
| 1448377_at              | 20568   | secretory leukocyte protease inhibitor                                             | 23.8                                     |
| 1419149_at              | 18787   | serine (or cysteine) proteinase inhibitor, clade E, member 1                       | 21.6                                     |
| 1449519_at              | 13197   | growth arrest and DNA-damage-inducible 45 alpha                                    | 19.2                                     |
| 1428864_at              | 71434   | RIKEN cDNA 5530400B01 gene                                                         | 18.7                                     |
| 1455197_at              | 223881  | Rho family GTPase 1                                                                | 18.4                                     |
| 1418829_a_at            | 13807   | enolase 2, gamma neuronal                                                          | 17.0                                     |
| 1450199_a_at            | 192187  | stabilin 1                                                                         | 16.3                                     |
| 1424735_at              | 227731  | solute carrier family 25 (mitochondrial carrier, phosphate carrier), member 25     | 15.9                                     |
| 1418930_at              | 15945   | chemokine (C-X-C motif) ligand 10                                                  | 15.0                                     |
| 1442856_at              | 223780  | adrenomedullin 2                                                                   | 14.8                                     |
| 1435462_at              | 433022  | hypothetical LOC433022                                                             | 14.5                                     |
| 1439837_at              | 227331  | trinucleotide repeat containing 15                                                 | 14.1                                     |
| 1419665_a_at            | 56312   | nuclear protein 1                                                                  | 14.0                                     |
| 1432088_at              | 72789   | ventricular zone expressed PH domain homolog 1 (zebrafish)                         | 13.9                                     |
| 1445381_at              |         |                                                                                    | 13.6                                     |
| 1450264_a_at            | 12660   | choline kinase alpha                                                               | 13.3                                     |
| 1417516_at              | 13198   | DNA-damage inducible transcript 3                                                  | 13.1                                     |
| 1424785_at              | 70726   | angiopoietin-like 6                                                                | 12.8                                     |
| 1433694_at              | 18576   | phosphodiesterase 3B, cGMP-inhibited                                               | 12.5                                     |
| 1438707_at              | 224079  | ATPase type 13A4                                                                   | 12.5                                     |
| 1417483_at              | 80859   | nuclear factor of kappa light polypeptide gene enhancer in B-cells inhibitor, zeta | 12.4                                     |
| 1422573_at              | 11717   | AMP deaminase 3                                                                    | 12.3                                     |
| 1419675_at              | 18049   | nerve growth factor, beta                                                          | 12.1                                     |
| 1420760_s_at            | 17990   | N-myc downstream regulated-like                                                    | 12.1                                     |
| 1426243_at              | 107869  | cystathionase (cystathionine gamma-lyase)                                          | 11.8                                     |
| 1449363_at              | 11910   | activating transcription factor 3                                                  | 11.7                                     |
| 1417262_at              | 19225   | prostaglandin-endoperoxide synthase 2                                              | 11.4                                     |
| 1419647_a_at            | 15937   | immediate early response 3                                                         | 11.3                                     |
| 1423602_at              | 22029   | Tnf receptor-associated factor 1                                                   | 11.2                                     |
| 1450829_at              | 21929   | tumor necrosis factor, alpha-induced protein 3                                     | 11.0                                     |
| 1433453_a_at            | 99382   | expressed sequence AW539457                                                        | 10.9                                     |
| 1417856_at              | 19698   | avian reticuloendotheliosis viral (v-rel) oncogene related B                       | 10.9                                     |
| 1425154_a_at            | 12977   | colony stimulating factor 1 (macrophage)                                           | 10.8                                     |
| 1436555_at              | 101999  | expressed sequence AI158848                                                        | 10.7                                     |
| 1427372_at              | 13115   | cytochrome P450, family 27, subfamily b, polypeptide 1                             | 10.6                                     |
| 1421392_a_at            | 11796   | baculoviral IAP repeat-containing 3                                                | 10.6                                     |
| 1418936_at              | 17133   | v-maf musculoaponeurotic fibrosarcoma oncogene family, protein F (avian)           | 10.5                                     |
| 1449731_s_at            |         |                                                                                    | 10.5                                     |
| 1439787_at              |         |                                                                                    | 10.2                                     |
| 1452416_at              | 16194   | interleukin 6 receptor, alpha                                                      | 10.1                                     |
| 1423413_at              | 17988   | N-myc downstream regulated gene 1                                                  | 9.7                                      |
| 1434442_at              | 52331   | DNA segment, Chr 5, ERATO Doi 593, expressed                                       | 9.7                                      |
| 1435955_at              | 243958  | sialic acid binding Ig-like lectin 10                                              | 9.6                                      |
| 1419853_a_at            |         |                                                                                    | 9.4                                      |
| 1436040_at              | 69471   | RIKEN cDNA 2310005L22 gene                                                         | 9.4                                      |
| 1426452_a_at            | 75985   | RAB30, member RAS oncogene family                                                  | 9.4                                      |
| 1416690_at              | 56055   | GTP binding protein 2                                                              | 8.9                                      |
| 1431035_at              | 208846  | dishevelled associated activator of morphogenesis 1                                | 8.9                                      |
| 1422612_at              | 15277   | hexokinase 2                                                                       | 8.8                                      |
| 1426065_a_at            | 228775  | tribbles homolog 3 (Drosophila)                                                    | 8.6                                      |

|              |                                                                                      |     |
|--------------|--------------------------------------------------------------------------------------|-----|
| 1422648_at   | 11988 solute carrier family 7 (cationic amino acid transporter, y+ system), member 2 | 8.4 |
| 1418133_at   | 12051 B-cell leukemia/lymphoma 3                                                     | 8.3 |
| 1426063_a_at | 14579 GTP binding protein (gene overexpressed in skeletal muscle)                    | 8.3 |
| 1444302_at   | 232313 cDNA sequence BC049816                                                        | 8.3 |
| 1448886_at   | 14462 GATA binding protein 3                                                         | 7.9 |
| 1421992_a_at | 16010 insulin-like growth factor binding protein 4                                   | 7.9 |
| 1451338_at   | 64652 nischarin                                                                      | 7.8 |
| 1420710_at   | 19696 reticuloendotheliosis oncogene                                                 | 7.7 |
| 1434574_at   | 68108 RIKEN cDNA 9430008C03 gene                                                     | 7.6 |
| 1419697_at   | 56066 chemokine (C-X-C motif) ligand 11                                              | 7.5 |
| 1427348_at   | 230738 zinc finger CCCH type containing 12A                                          | 7.4 |
| 1425519_a_at | 16149 Ia-associated invariant chain                                                  | 7.3 |
| 1417408_at   | 14066 coagulation factor III                                                         | 7.2 |
| 1420991_at   | 107765 ankyrin repeat domain 1 (cardiac muscle)                                      | 7.2 |
| 1420089_at   | 18035 Nuclear factor of kappa light chain gene enhancer in B-cells inhibitor, alpha  | 7.2 |
| 1439071_at   | 71426 RIKEN cDNA 5430416N02 gene                                                     | 7.1 |
| 1422738_at   | 18214 discoidin domain receptor family, member 2                                     | 7.1 |
| 1425837_a_at | 12457 CCR4 carbon catabolite repression 4-like ( <i>S. cerevisiae</i> )              | 7.1 |
| 1448485_at   | 14598 gamma-glutamyltransferase 1                                                    | 7.0 |
| 1431188_a_at | 21968 /// target of myb1 homolog (chicken) /// similar to TOM1<br>545878             | 7.0 |
| 1426806_at   | 109019 RIKEN cDNA 5830411E10 gene                                                    | 6.9 |
| 1418901_at   | 12608 CCAAT/enhancer binding protein (C/EBP), beta                                   | 6.9 |
| 1424942_a_at | 17869 myelocytomatosis oncogene                                                      | 6.9 |
| 1419029_at   | 50527 ERO1-like ( <i>S. cerevisiae</i> )                                             | 6.9 |
| 1422493_at   | 12892 coproporphyrinogen oxidase                                                     | 6.9 |
| 1419105_at   | 20186 nuclear receptor subfamily 1, group H, member 4                                | 6.9 |
| 1455688_at   | 98434 hypothetical LOC98434                                                          | 6.9 |
| 1434210_s_at | 16206 leucine-rich repeats and immunoglobulin-like domains 1                         | 6.8 |
| 1426027_a_at | 78514 Rho GTPase activating protein 10                                               | 6.7 |
| 1416268_at   | 23872 E26 avian leukemia oncogene 2, 3' domain                                       | 6.7 |
| 1418422_at   | 93806 serine (or cysteine) proteinase inhibitor, clade B, member 9g                  | 6.7 |
| 1416432_at   | 170768 6-phosphofructo-2-kinase/fructose-2,6-biphosphatase 3                         | 6.6 |
| 1451415_at   | 69068 RIKEN cDNA 1810011O10 gene                                                     | 6.6 |
| 1427334_s_at | 67246 RIKEN cDNA 2810474O19 gene                                                     | 6.5 |
| 1450630_at   | 60507 queuine tRNA-ribosyltransferase 1                                              | 6.4 |
| 1417256_at   | 17386 matrix metalloproteinase 13                                                    | 6.4 |
| 1417487_at   | 14283 fos-like antigen 1                                                             | 6.3 |
| 1428279_a_at | 72174 ataxin 7-like 4                                                                | 6.3 |
| 1426464_at   | 217166 nuclear receptor subfamily 1, group D, member 1                               | 6.3 |
| 1448855_at   | 56289 Ras association (RalGDS/AF-6) domain family 1                                  | 6.2 |
| 1455148_at   | 243339 hypothetical protein C130036G08                                               | 6.1 |
| 1435540_at   | 210146 immunity-related GTPase family, Q1                                            | 6.1 |
| 1447936_at   | 69221 RIKEN cDNA 2410006H16 gene                                                     | 6.0 |
| 1418932_at   | 18030 nuclear factor, interleukin 3, regulated                                       | 6.0 |
| 1448325_at   | 17872 myeloid differentiation primary response gene 116                              | 5.9 |
| 1448657_a_at | 56812 DnaJ (Hsp40) homolog, subfamily B, member 10                                   | 5.9 |
| 1436350_at   | 241520 RIKEN cDNA D430039N05 gene                                                    | 5.9 |
| 1425030_at   | 52521 zinc finger protein 622                                                        | 5.7 |
| 1433798_a_at | 105418 RIKEN cDNA E330034G19 gene                                                    | 5.7 |
| 1420088_at   |                                                                                      | 5.7 |
| 1428691_at   | 71437 RIKEN cDNA 5630401D06 gene                                                     | 5.7 |
| 1435062_at   | 68955 RIKEN cDNA 1500001A10 gene                                                     | 5.7 |
| 1421640_a_at | 21353 TRAF family member-associated Nf-kappa B activator                             | 5.7 |
| 1437204_a_at |                                                                                      | 5.7 |
| 1417409_at   | 16476 Jun oncogene                                                                   | 5.6 |
| 1423903_at   | 52118 poliovirus receptor                                                            | 5.6 |
| 1417032_at   | 22213 ubiquitin-conjugating enzyme E2G 2                                             | 5.6 |
| 1420382_at   | 171504 apolipoprotein B48 receptor                                                   | 5.6 |
| 1435229_at   | 235283 RIKEN cDNA A930008A22 gene                                                    | 5.5 |
| 1437199_at   | 240672 gene model 337, (NCBI)                                                        | 5.3 |
| 1416067_at   | 15982 interferon-related developmental regulator 1                                   | 5.2 |
| 1419203_at   | 24082 gene trap locus F3a                                                            | 5.2 |
| 1419088_at   | 21859 tissue inhibitor of metalloproteinase 3                                        | 5.2 |
| 1448593_at   | 22402 WNT1 inducible signaling pathway protein 1                                     | 5.1 |
| 1451593_at   | 15006 Histocompatibility 2, D region locus 1                                         | 5.1 |
| 1423156_at   | 54342 glucosamine-phosphate N-acetyltransferase 1                                    | 5.1 |
| 1426928_at   | 70829 RIKEN cDNA 4633402D15 gene                                                     | 5.1 |
| 1448239_at   | 15368 heme oxygenase (decycling) 1                                                   | 5.1 |
| 1419793_at   |                                                                                      | 5.1 |
| 1424861_at   | 100662 RIKEN cDNA D930016D06 gene                                                    | 5.1 |
| 1418714_at   | 18218 dual specificity phosphatase 8                                                 | 5.1 |

|              |                                                                                                                                                        |     |
|--------------|--------------------------------------------------------------------------------------------------------------------------------------------------------|-----|
| 1449324_at   | 434220 /// ERO1-like (S. cerevisiae) /// hypothetical gene supported by AK009667; NM_015774<br>50527                                                   | 5.1 |
| 1423848_at   | 68533 M phase phosphoprotein 6                                                                                                                         | 5.0 |
| 1436424_at   | 72012 RIKEN cDNA 1600020E01 gene                                                                                                                       | 5.0 |
| 1429217_at   | 72611 zinc finger protein 655                                                                                                                          | 5.0 |
| 1419061_at   | 11854 ras homolog gene family, member D                                                                                                                | 4.9 |
| 1424940_s_at | 217887 cDNA sequence BC022687                                                                                                                          | 4.9 |
| 1429040_at   | 381598 RIKEN cDNA 2610005L07 gene                                                                                                                      | 4.9 |
| 1443883_at   | 66460 RIKEN cDNA 2610042O14 gene                                                                                                                       | 4.9 |
| 1419431_at   | 13874 epipegulin                                                                                                                                       | 4.9 |
| 1448961_at   | 18828 phospholipid scramblase 2                                                                                                                        | 4.8 |
| 1422748_at   | 24136 zinc finger homeobox 1b                                                                                                                          | 4.8 |
| 1455196_s_at | 380856 expressed sequence AA987161                                                                                                                     | 4.8 |
| 1445758_at   |                                                                                                                                                        | 4.8 |
| 1449603_at   | 103795 expressed sequence AI594671                                                                                                                     | 4.7 |
| 1434405_at   | 216742 RIKEN cDNA A730024A03 gene                                                                                                                      | 4.7 |
| 1434980_at   | 320207 phosphoinositide-3-kinase, regulatory subunit 5, p101                                                                                           | 4.7 |
| 1436594_at   | 210105 RIKEN cDNA C630016O21 gene                                                                                                                      | 4.7 |
| 1451382_at   | 69065 RIKEN cDNA 1810008K03 gene                                                                                                                       | 4.7 |
| 1451888_a_at | 23966 odd Oz/ten-m homolog 4 (Drosophila)                                                                                                              | 4.6 |
| 1416769_s_at | 114143 ATPase, H+ transporting, V0 subunit B                                                                                                           | 4.6 |
| 1419516_at   | 108160 DNA segment, human DXS9928E                                                                                                                     | 4.6 |
| 1419558_at   | 17248 transformed mouse 3T3 cell double minute 4                                                                                                       | 4.6 |
| 1418571_at   | 27279 tumor necrosis factor receptor superfamily, member 12a                                                                                           | 4.6 |
| 1418666_at   | 19288 pentraxin related gene                                                                                                                           | 4.6 |
| 1425412_at   | 216799 cold autoinflammatory syndrome 1 homolog (human)                                                                                                | 4.6 |
| 1415941_s_at | 100494 expressed sequence AA407930                                                                                                                     | 4.5 |
| 1423233_at   | 12609 CCAAT/enhancer binding protein (C/EBP), delta                                                                                                    | 4.5 |
| 1441836_x_at | 74174 RIKEN cDNA 1700006H03 gene                                                                                                                       | 4.5 |
| 1437362_at   | 229780 RIKEN cDNA A930028L21 gene                                                                                                                      | 4.5 |
| 1420909_at   | 22339 vascular endothelial growth factor A                                                                                                             | 4.5 |
| 1435108_at   | 239027 Rho GTPase activating protein 22                                                                                                                | 4.5 |
| 1424067_at   | 15894 intercellular adhesion molecule                                                                                                                  | 4.5 |
| 1451233_at   | 22030 Tnf receptor-associated factor 2                                                                                                                 | 4.5 |
| 1433674_a_at | 83673 RNA, U22 small nucleolar                                                                                                                         | 4.4 |
| 1435432_at   | 347722 centaurin, gamma 2                                                                                                                              | 4.4 |
| 1420499_at   | 14528 GTP cyclohydrolase 1                                                                                                                             | 4.4 |
| 1429527_a_at | 22038 /// phospholipid scramblase 1 /// similar to phospholipid scramblase 1<br>433328                                                                 | 4.4 |
| 1424489_a_at | 66966 tRNA isopentenyltransferase 1                                                                                                                    | 4.4 |
| 1427689_a_at | 57783 TNFAIP3 interacting protein 1                                                                                                                    | 4.4 |
| 1426526_s_at | 12659 oviductal glycoprotein 1                                                                                                                         | 4.3 |
| 1436073_at   | 213993 RIKEN cDNA A630007B06 gene                                                                                                                      | 4.3 |
| 1418423_s_at | 20709 /// serine (or cysteine) proteinase inhibitor, clade B, member 9f /// serine (or cysteine) proteinase inhibi<br>20710 ///<br>544923 ///<br>93806 | 4.3 |
| 1428858_at   | 73770 WD repeat domain 70                                                                                                                              | 4.3 |
| 1424211_at   | 70556 RIKEN cDNA 5730438N18 gene                                                                                                                       | 4.3 |
| 1448596_at   | 102857 solute carrier family 6 (neurotransmitter transporter, creatine), member 8                                                                      | 4.2 |
| 1448385_at   | 100561 solute carrier family 15, member 4                                                                                                              | 4.2 |
| 1424041_s_at | 50908 complement component 1, s subcomponent                                                                                                           | 4.1 |
| 1456389_at   | 319891 RIKEN cDNA 9130203F04 gene                                                                                                                      | 4.1 |
| 1421756_a_at | 14760 G protein-coupled receptor 19                                                                                                                    | 4.1 |
| 1422886_a_at | 12750 CDC like kinase 4                                                                                                                                | 4.1 |
| 1457042_at   |                                                                                                                                                        | 4.1 |
| 1436212_at   | 213068 expressed sequence AI661017                                                                                                                     | 4.0 |
| 1435680_a_at | 83768 dipeptidylpeptidase 7                                                                                                                            | 4.0 |
| 1458438_at   | 108811 RIKEN cDNA 4933415L06 gene                                                                                                                      | 4.0 |
| 1429005_at   | 52065 malignant fibrous histiocytoma amplified sequence 1                                                                                              | 4.0 |
| 1448014_s_at | 329908 ubiquitin specific protease 24                                                                                                                  | 4.0 |
| 1422544_at   | 17909 myosin X                                                                                                                                         | 4.0 |
| 1418960_at   | 239510 PHD finger protein 20-like 1                                                                                                                    | 4.0 |
| 1426536_at   | 93697 NMDA receptor-regulated gene 2                                                                                                                   | 4.0 |
| 1415997_at   | 56338 thioredoxin interacting protein                                                                                                                  | 3.9 |
| 1422018_at   | 15273 human immunodeficiency virus type I enhancer binding protein 2                                                                                   | 3.9 |
| 1421042_at   | 16800 rho/rac guanine nucleotide exchange factor (GEF) 2                                                                                               | 3.9 |
| 1436526_at   | 214505 N-acetylglucosamine-1-phosphotransferase, gamma subunit                                                                                         | 3.9 |
| 1420113_s_at | 66423 RIKEN cDNA 2410022L05 gene                                                                                                                       | 3.9 |
| 1428383_a_at | 268721 RIKEN cDNA 2310021P13 gene                                                                                                                      | 3.9 |
| 1418835_at   | 21664 pleckstrin homology-like domain, family A, member 1                                                                                              | 3.9 |
| 1421089_a_at | 72400 RIKEN cDNA 2610028A01 gene                                                                                                                       | 3.9 |

|              |                                                                                                                                    |     |
|--------------|------------------------------------------------------------------------------------------------------------------------------------|-----|
| 1430062_at   | 214305 RIKEN cDNA 1600002O04 gene                                                                                                  | 3.9 |
| 1453294_at   | 74173 RIKEN cDNA 1700012B15 gene                                                                                                   | 3.9 |
| 1420617_at   | 67579 cytoplasmic polyadenylation element binding protein 4                                                                        | 3.8 |
| 1418025_at   | 20893 basic helix-loop-helix domain containing, class B2                                                                           | 3.8 |
| 1423622_a_at | 56706 cyclin L1                                                                                                                    | 3.8 |
| 1426501_a_at | 211550 Traf2 binding protein                                                                                                       | 3.8 |
| 1427171_at   | 109263 rearranged L-myc fusion sequence                                                                                            | 3.8 |
| 1418503_at   | 15526 heat shock protein 9A                                                                                                        | 3.8 |
| 1449437_at   | 28040 DNA segment, Chr 6, Wayne State University 163, expressed                                                                    | 3.8 |
| 1421058_at   | 11529 alcohol dehydrogenase 7 (class IV), mu or sigma polypeptide                                                                  | 3.8 |
| 1425902_a_at | 18034 nuclear factor of kappa light polypeptide gene enhancer in B-cells 2, p49/p100                                               | 3.8 |
| 1424354_at   | 68487 RIKEN cDNA 1110007F12 gene                                                                                                   | 3.8 |
| 1426810_at   | 104263 jumonji domain containing 1A                                                                                                | 3.8 |
| 1442654_at   | Transcribed locus                                                                                                                  | 3.8 |
| 1454976_at   | Adult male urinary bladder cDNA, RIKEN full-length enriched library, clone:9530055M18<br>product:unknown EST, full insert sequence | 3.8 |
| 1418203_at   | 58801 phorbol-12-myristate-13-acetate-induced protein 1                                                                            | 3.7 |
| 1438238_at   | 72071 RIKEN cDNA 2010315B03 gene                                                                                                   | 3.7 |
| 1429412_at   | 223527 enhancer of yellow 2 homolog (Drosophila)                                                                                   | 3.7 |
| 1428372_at   | 76954 suppression of tumorigenicity 5                                                                                              | 3.7 |
| 1426726_at   | 52040 /// protein phosphatase 1, regulatory subunit 10 /// hypothetical protein LOC545202<br>545202                                | 3.6 |
| 1450970_at   | 14718 glutamate oxaloacetate transaminase 1, soluble                                                                               | 3.6 |
| 1424048_a_at | 72017 NAD(P)H:quinone oxidoreductase type 3, polypeptide A2                                                                        | 3.6 |
| 1427905_at   | 67509 RIKEN cDNA 1810063B07 gene                                                                                                   | 3.6 |
| 1418032_at   | 101142 RIKEN cDNA 2700050P07 gene                                                                                                  | 3.6 |
| 1426290_at   | 66254 RIKEN cDNA 1500031M22 gene                                                                                                   | 3.6 |
| 1448263_a_at | 66054 CNDP dipeptidase 2 (metallopeptidase M20 family)                                                                             | 3.6 |
| 1427540_at   | 52696 ZW10 interactor                                                                                                              | 3.6 |
| 1417060_at   | 76497 protein phosphatase 1, regulatory (inhibitor) subunit 11                                                                     | 3.6 |
| 1419758_at   | 18671 ATP-binding cassette, sub-family B (MDR/TAP), member 1A                                                                      | 3.6 |
| 1451340_at   | 214855 AT rich interactive domain 5A (Mrf1 like)                                                                                   | 3.6 |
| 1419702_at   | 21339 TATA box binding protein (Tbp)-associated factor, RNA polymerase I, A                                                        | 3.6 |
| 1419523_at   | 13113 cytochrome P450, family 3, subfamily a, polypeptide 13                                                                       | 3.6 |
| 1423534_at   | 18567 programmed cell death 2                                                                                                      | 3.6 |
| 1438045_at   | 216238 early endosome antigen 1                                                                                                    | 3.6 |
| 1425305_at   | 114565 zinc finger protein 295                                                                                                     | 3.5 |
| 1436802_at   | 16201 interleukin enhancer binding factor 3                                                                                        | 3.5 |
| 1418469_at   | 268903 nuclear receptor interacting protein 1                                                                                      | 3.5 |
| 1448436_a_at | 16362 interferon regulatory factor 1                                                                                               | 3.5 |
| 1437100_x_at | 223775 proviral integration site 3                                                                                                 | 3.5 |
| 1417193_at   | 20656 superoxide dismutase 2, mitochondrial                                                                                        | 3.5 |
| 1422264_s_at | 16601 Kruppel-like factor 9                                                                                                        | 3.5 |
| 1452110_at   | 210009 5-methyltetrahydrofolate-homocysteine methyltransferase reductase                                                           | 3.5 |
| 1429907_at   | 73545 RIKEN cDNA 1700094D03 gene                                                                                                   | 3.5 |
| 1441691_at   | Transcribed locus                                                                                                                  | 3.5 |
| 1416458_at   | 11841 ADP-ribosylation factor 2                                                                                                    | 3.4 |
| 1418495_at   | 57432 zinc finger CCCH type containing 8                                                                                           | 3.4 |
| 1450738_at   | 16564 kinesin family member 21A                                                                                                    | 3.4 |
| 1428909_at   | 319269 RIKEN cDNA A130040M12 gene                                                                                                  | 3.4 |
| 1435400_at   | 69765 RIKEN cDNA 2900075B16 gene                                                                                                   | 3.4 |
| 1421307_at   | 71934 carbonic anhydrase 13                                                                                                        | 3.4 |
| 1433668_at   | 108767 proline-rich nuclear receptor coactivator 1                                                                                 | 3.4 |
| 1418673_at   | 20583 snail homolog 2 (Drosophila)                                                                                                 | 3.4 |
| 1422804_at   | 20708 serine (or cysteine) proteinase inhibitor, clade B, member 6b                                                                | 3.4 |
| 1423434_at   | 21676 TEA domain family member 1                                                                                                   | 3.4 |
| 1451021_a_at | 12224 Kruppel-like factor 5                                                                                                        | 3.4 |
| 1418188_a_at | 54409 receptor (calcitonin) activity modifying protein 2                                                                           | 3.4 |
| 1449949_a_at | 13052 coxsackievirus and adenovirus receptor                                                                                       | 3.4 |
| 1437615_s_at | 107305 RIKEN cDNA 5730409F24 gene                                                                                                  | 3.3 |
| 1454862_at   | 208177 pleckstrin homology-like domain, family B, member 2                                                                         | 3.3 |
| 1418949_at   | 23886 growth differentiation factor 15                                                                                             | 3.3 |
| 1449041_a_at | 22051 thyroid hormone receptor interactor 6                                                                                        | 3.3 |
| 1451780_at   | 17060 B-cell linker                                                                                                                | 3.3 |
| 1437176_at   | 434341 similar to nucleotide-binding oligomerization domains 27                                                                    | 3.3 |
| 1424892_at   | 22757 zinc finger protein 95                                                                                                       | 3.3 |
| 1441263_a_at | 68161 RIKEN cDNA A930005H10 gene                                                                                                   | 3.3 |
| 1436119_at   | 216188 aldehyde dehydrogenase 1 family, member L2                                                                                  | 3.3 |
| 1424533_a_at | 67291 RIKEN cDNA 3110023B02 gene                                                                                                   | 3.3 |
| 1415671_at   | 11972 ATPase, H+ transporting, V0 subunit D isoform 1                                                                              | 3.2 |
| 1435248_a_at | 107182 BTA1 RNA polymerase II, B-TFIID transcription factor-associated, 170kDa (Mot1 homolog, S. cerevisiae)                       | 3.2 |

|              |                                                                                             |     |
|--------------|---------------------------------------------------------------------------------------------|-----|
| 1426713_s_at | 107508 glutamyl-prolyl-tRNA synthetase                                                      | 3.2 |
| 1434348_at   | 225020 fasciculation and elongation protein zeta 2 (zygin II)                               | 3.2 |
| 1452626_a_at | 69064 RIKEN cDNA 1810014F10 gene                                                            | 3.2 |
| 1438167_x_at | 216805 Folliculin                                                                           | 3.2 |
| 1438803_s_at | 74718 sorting nexin 16                                                                      | 3.2 |
| 1427159_at   | 74737 RIKEN cDNA 2500001H09 gene                                                            | 3.2 |
| 1437751_at   | 19017 peroxisome proliferative activated receptor, gamma, coactivator 1 alpha               | 3.2 |
| 1437884_at   | 75869 ADP-ribosylation factor-like 8                                                        | 3.2 |
| 1434025_at   | Transcribed locus                                                                           | 3.2 |
| 1416224_at   | 22642 zinc finger and BTB domain containing 17                                              | 3.2 |
| 1455908_a_at | 74617 serine carboxypeptidase 1                                                             | 3.2 |
| 1415881_at   | 66092 growth hormone inducible transmembrane protein                                        | 3.2 |
| 1416602_a_at | 19365 RAD52 homolog (S. cerevisiae)                                                         | 3.2 |
| 1437495_at   | 270669 membrane-bound transcription factor protease, site 2                                 | 3.2 |
| 1455487_at   | 69900 RIKEN cDNA 2600014M03 gene                                                            | 3.2 |
| 1415989_at   | 22329 vascular cell adhesion molecule 1                                                     | 3.1 |
| 1434813_x_at | 22375 tryptophanyl-tRNA synthetase                                                          | 3.1 |
| 1421236_at   | 192656 receptor (TNFRSF)-interacting serine-threonine kinase 2                              | 3.1 |
| 1434113_a_at | 227656 XPMC2 prevents mitotic catastrophe 2 homolog (Xenopus laevis)                        | 3.1 |
| 1424043_at   | 67418 peptidylprolyl isomerase (cyclophilin)-like 4                                         | 3.1 |
| 1425099_a_at | 11865 aryl hydrocarbon receptor nuclear translocator-like                                   | 3.1 |
| 1448057_at   | Transcribed locus                                                                           | 3.1 |
| 1422053_at   | 16323 inhibin beta-A                                                                        | 3.1 |
| 1448793_a_at | 20971 syndecan 4                                                                            | 3.1 |
| 1449110_at   | 11852 ras homolog gene family, member B                                                     | 3.1 |
| 1460369_at   | 233987 cDNA sequence BC003267                                                               | 3.1 |
| 1434855_at   | 245847 RIKEN cDNA 5730457F11 gene                                                           | 3.1 |
| 1419650_at   | 22763 zinc finger RNA binding protein                                                       | 3.0 |
| 1425927_a_at | 107503 activating transcription factor 5                                                    | 3.0 |
| 1438992_x_at | 11911 activating transcription factor 4                                                     | 3.0 |
| 1443558_s_at | 103466 RIKEN cDNA C630002B14 gene                                                           | 3.0 |
| 1416273_at   | 21928 tumor necrosis factor, alpha-induced protein 2                                        | 3.0 |
| 1433850_at   | 232314 protein phosphatase 4, regulatory subunit 2                                          | 3.0 |
| 1455210_at   | 387609 zinc fingers and homeoboxes protein 2                                                | 3.0 |
| 1444644_x_at | 69694 TatD DNase domain containing 1                                                        | 3.0 |
| 1427005_at   | 20620 polo-like kinase 2 (Drosophila)                                                       | 3.0 |
| 1428487_s_at | 67876 RIKEN cDNA 1500041J02 gene                                                            | 3.0 |
| 1415747_s_at | 66878 RIO kinase 3 (yeast)                                                                  | 3.0 |
| 1416272_at   | 56692 mitogen-activated protein kinase kinase 1 interacting protein 1                       | 3.0 |
| 1438684_at   | 77976 ZNUAK family, SNF1-like kinase, 1                                                     | 2.9 |
| 1416029_at   | 21847 Kruppel-like factor 10                                                                | 2.9 |
| 1427046_at   | 252973 transcription factor CP2-like 3                                                      | 2.9 |
| 1428982_at   | 320817 RIKEN cDNA D530031C13 gene                                                           | 2.9 |
| 1448529_at   | 21824 thrombomodulin                                                                        | 2.9 |
| 1418605_at   | 22025 nuclear receptor subfamily 2, group C, member 1                                       | 2.9 |
| 1418115_s_at | 64164 interferon alpha responsive gene                                                      | 2.9 |
| 1422864_at   | 12394 runt related transcription factor 1                                                   | 2.9 |
| 1447961_s_at | 60441 mitochondrial ribosomal protein L38                                                   | 2.9 |
| 1426459_s_at | 106064 expressed sequence AW549877                                                          | 2.9 |
| 1428419_at   | 71423 RIKEN cDNA 5430411K18 gene                                                            | 2.9 |
| 1422742_at   | 110521 human immunodeficiency virus type I enhancer binding protein 1                       | 2.8 |
| 1453228_at   | 74732 syntaxin 11                                                                           | 2.8 |
| 1423103_at   |                                                                                             | 2.8 |
| 1426300_at   | 11658 activated leukocyte cell adhesion molecule                                            | 2.8 |
| 1418248_at   | 11605 galactosidase, alpha                                                                  | 2.8 |
| 1419122_at   | 17299 methyltransferase-like 1                                                              | 2.8 |
| 1452406_x_at | 170942 erythroid differentiation regulator 1                                                | 2.8 |
| 1433962_at   | 328162 RIKEN cDNA 6720458F09 gene                                                           | 2.8 |
| 1420367_at   | 68184 density-regulated protein                                                             | 2.8 |
| 1451622_at   | 68421 LMBR1 domain containing 1                                                             | 2.8 |
| 1423760_at   | 12505 CD44 antigen                                                                          | 2.8 |
| 1438133_a_at | 16007 cysteine rich protein 61                                                              | 2.8 |
| 1418850_at   | 13831 enhancer of polycomb homolog 1 (Drosophila)                                           | 2.8 |
| 1421065_at   | 16452 Janus kinase 2                                                                        | 2.8 |
| 1431843_a_at | 18037 nuclear factor of kappa light polypeptide gene enhancer in B-cells inhibitor, epsilon | 2.8 |
| 1423044_at   | 114863 proline synthetase co-transcribed                                                    | 2.8 |
| 1460370_at   | 72960 DNA topoisomerase 1, mitochondrial                                                    | 2.8 |
| 1417936_at   | 20308 chemokine (C-C motif) ligand 9                                                        | 2.7 |
| 1427705_a_at | 18033 nuclear factor of kappa light chain gene enhancer in B-cells 1, p105                  | 2.7 |
| 1435470_at   |                                                                                             | 2.7 |
| 1436562_at   | 230073 DEAD (Asp-Glu-Ala-Asp) box polypeptide 58                                            | 2.7 |
| 1418350_at   | 15200 heparin-binding EGF-like growth factor                                                | 2.7 |

|              |                                                                                                        |     |
|--------------|--------------------------------------------------------------------------------------------------------|-----|
| 1424866_at   | 216835 ubiquitin specific protease 43                                                                  | 2.7 |
| 1418078_at   | 19192 proteasome (prosome, macropain) 28 subunit, 3                                                    | 2.7 |
| 1428936_at   | 67972 ATPase, Ca <sup>++</sup> transporting, plasma membrane 1                                         | 2.7 |
| 1423296_at   | 57296 proteasome (prosome, macropain) 26S subunit, non-ATPase, 8                                       | 2.7 |
| 1428635_at   | 69156 catechol-O-methyltransferase domain containing 1                                                 | 2.7 |
| 1451491_at   | 75284 RIKEN cDNA 4930556P03 gene                                                                       | 2.7 |
| 1460691_at   | 213753 zinc finger protein 598                                                                         | 2.7 |
| 1427578_a_at | 16418 integrin beta 4 binding protein                                                                  | 2.7 |
| 1440040_at   | 12571 Cyclin-dependent kinase 6                                                                        | 2.7 |
| 1440527_at   | Transcribed locus                                                                                      | 2.7 |
| 1430417_s_at | 216860 RIKEN cDNA 0610025P10 gene                                                                      | 2.7 |
| 1452062_at   | 212627 phosphoribosyl pyrophosphate synthetase-associated protein 2                                    | 2.7 |
| 1423552_at   | 68192 leptin receptor overlapping transcript-like 1                                                    | 2.6 |
| 1456880_at   |                                                                                                        | 2.6 |
| 1425536_at   |                                                                                                        | 2.6 |
| 1426827_at   | 231386 RIKEN cDNA A730098D12 gene                                                                      | 2.6 |
| 1450247_a_at | 56807 secretory carrier membrane protein 5                                                             | 2.6 |
| 1418539_a_at | 19267 protein tyrosine phosphatase, receptor type, E                                                   | 2.6 |
| 1429650_at   | 74178 serine/threonine kinase 40                                                                       | 2.6 |
| 1428560_at   | 72322 exportin 5                                                                                       | 2.6 |
| 1439497_at   | Transcribed locus                                                                                      | 2.6 |
| 1432478_a_at | 75234 IBR domain containing 3                                                                          | 2.6 |
| 1434300_at   | 67958 RIKEN cDNA 2610101N10 gene                                                                       | 2.6 |
| 1436684_a_at | 67045 RIO kinase 2 (yeast)                                                                             | 2.6 |
| 1425262_at   | 12611 CCAAT/enhancer binding protein (C/EBP), gamma                                                    | 2.6 |
| 1437650_at   | 331006 hypothetical protein C730026J16                                                                 | 2.6 |
| 1429491_s_at | 51869 Rap1 interacting factor 1 homolog (yeast)                                                        | 2.6 |
| 1417088_at   | 26919 zinc finger protein 346                                                                          | 2.5 |
| 1438233_at   | 226151 RIKEN cDNA 6030443O07 gene                                                                      | 2.5 |
| 1428771_at   | 76788 RIKEN cDNA 2410127E18 gene                                                                       | 2.5 |
| 1437480_at   | 66140 RIKEN cDNA 1110001A07 gene                                                                       | 2.5 |
| 1453119_at   | 71198 OTU domain containing 1                                                                          | 2.5 |
| 1416418_at   | 57436 gamma-aminobutyric acid (GABA(A)) receptor-associated protein-like 1                             | 2.5 |
| 1454725_at   | 101214 RIKEN cDNA G430041M01 gene                                                                      | 2.5 |
| 1423507_a_at | 64383 sirtuin 2 (silent mating type information regulation 2, homolog) 2 (S. cerevisiae)               | 2.5 |
| 1436183_at   | 319257 RIKEN cDNA 9830115L13 gene                                                                      | 2.5 |
| 1430300_at   | 52892 SCO cytochrome oxidase deficient homolog 1 (yeast)                                               | 2.4 |
| 1454923_at   | 107036 expressed sequence AW214353                                                                     | 2.4 |
| 1428674_at   | 66921 PRP38 pre-mRNA processing factor 38 (yeast) domain containing B                                  | 2.4 |
| 1433851_at   |                                                                                                        | 2.4 |
| 1424996_at   | 12633 CASP8 and FADD-like apoptosis regulator                                                          | 2.4 |
| 1418114_at   | 19664 recombining binding protein suppressor of hairless (Drosophila)                                  | 2.4 |
| 1460561_x_at | 20364 selenoprotein W, muscle 1                                                                        | 2.4 |
| 1424507_at   | 225870 Ras and Rab interactor 1                                                                        | 2.4 |
| 1440145_at   |                                                                                                        | 2.4 |
| 1421818_at   | 12053 B-cell leukemia/lymphoma 6                                                                       | 2.4 |
| 1427364_a_at | 18263 /// ornithine decarboxylase, structural 1 /// similar to Ornithine decarboxylase (ODC)<br>545783 | 2.4 |
| 1460278_a_at | 28075 DNA segment, Chr 15, Wayne State University 75, expressed                                        | 2.3 |
| 1418369_at   | 19075 DNA primase, p49 subunit                                                                         | 2.3 |
| 1460638_at   | 107271 tyrosyl-tRNA synthetase                                                                         | 2.3 |
| 1419543_a_at | 20462 splicing factor, arginine/serine-rich 10 (transformer 2 homolog, Drosophila)                     | 2.3 |
| 1419544_at   | 66335 ATPase, H+ transporting, V1 subunit C, isoform 1                                                 | 2.3 |
| 1429778_at   | 71648 optineurin                                                                                       | 2.3 |
| 1434241_at   | 210544 WD repeat domain 67                                                                             | 2.3 |
| 1460323_at   | 110960 threonyl-tRNA synthetase                                                                        | 2.2 |
| 1416951_a_at | 73834 ATPase, H+ transporting, V1 subunit D                                                            | 2.2 |

#### Downregulated transcripts

| Affymetrix probe set ID | Gene ID | Gene description                                    | Fold change compared to uninfected mGEPs |
|-------------------------|---------|-----------------------------------------------------|------------------------------------------|
| 1416326_at              | 12925   | cysteine-rich protein 1 (intestinal)                | -119.7                                   |
| 1436528_at              | 107250  | Kazal-type serine protease inhibitor domain 1       | -28.3                                    |
| 1449248_at              | 12724   | chloride channel 2                                  | -27.6                                    |
| 1435315_s_at            | 72904   | RIKEN cDNA 2900034E22 gene                          | -21.4                                    |
| 1418980_a_at            | 12799   | cyclic nucleotide phosphodiesterase 1               | -16.4                                    |
| 1426517_at              | 14687   | guanine nucleotide binding protein, alpha z subunit | -16.4                                    |
| 1419292_at              | 78558   | serine protease HTRA3                               | -16.1                                    |
| 1450062_a_at            | 94275   | melanoma antigen, family D, 1                       | -14.8                                    |
| 1416553_at              | 20892   | stimulated by retinoic acid 13                      | -13.7                                    |
| 1416368_at              | 14860   | glutathione S-transferase, alpha 4                  | -13.2                                    |

|              |                                                                                                             |       |
|--------------|-------------------------------------------------------------------------------------------------------------|-------|
| 1435557_at   | 234686 formin homology 2 domain containing 1                                                                | -13.0 |
| 1423488_at   | 67468 monocyte to macrophage differentiation-associated                                                     | -12.6 |
| 1417732_at   | 11752 annexin A8                                                                                            | -12.4 |
| 1417220_at   | 14085 fumarylacetoacetate hydrolase                                                                         | -12.4 |
| 1438115_a_at | 26941 solute carrier family 9 (sodium/hydrogen exchanger), isoform 3 regulator 1                            | -10.6 |
| 1460674_at   | 71904 progesterin and adipoQ receptor family member VII                                                     | -10.2 |
| 1423642_at   | 227613 RIKEN cDNA 4930542G03 gene                                                                           | -10.1 |
| 1435292_at   | 210789 TBC1 domain family, member 4                                                                         | -9.8  |
| 1420622_a_at | 15481 /// heat shock protein 8 /// similar to heat shock protein 8 /// similar to Heat shock cognate 71 kDa | -9.7  |
|              | 432432 /// protein                                                                                          |       |
|              | 434047                                                                                                      |       |
| 1448661_at   | 18797 phospholipase C, beta 3                                                                               | -9.6  |
| 1452040_a_at | 14793 cell division cycle associated 3                                                                      | -9.0  |
| 1438195_at   | 333433 glycerol-3-phosphate dehydrogenase 1-like                                                            | -8.8  |
| 1434123_at   | 73068 fucosyltransferase 11                                                                                 | -8.4  |
| 1448354_at   | 14381 glucose-6-phosphate dehydrogenase X-linked                                                            | -8.2  |
| 1415822_at   | 20250 stearoyl-Coenzyme A desaturase 2                                                                      | -8.1  |
| 1415818_at   | 11749 annexin A6                                                                                            | -8.0  |
| 1450966_at   | 74114 carnitine O-octanoyltransferase                                                                       | -7.8  |
| 1444451_at   | 23850 pappalysin 2                                                                                          | -7.7  |
| 1437760_at   | 230145 UDP-N-acetyl-alpha-D-galactosamine:polypeptide N-acetylgalactosaminyltransferase 12                  | -7.6  |
| 1435666_at   | 234385 microtubule associated serine/threonine kinase 3                                                     | -7.6  |
| 1424451_at   | 235674 3-ketoacyl-CoA thiolase B                                                                            | -7.4  |
| 1456393_at   | 66360 RIKEN cDNA 2310002J21 gene                                                                            | -7.3  |
| 1415995_at   | 12368 caspase 6                                                                                             | -7.3  |
| 1415864_at   | 12183 2,3-bisphosphoglycerate mutase                                                                        | -7.2  |
| 1454893_at   | 68521 RIKEN cDNA 1110013L07 gene                                                                            | -7.2  |
| 1451386_at   | 233016 biliverdin reductase B (flavin reductase (NADPH))                                                    | -7.1  |
| 1428646_at   | 70402 RIKEN cDNA 2310056B04 gene                                                                            | -7.1  |
| 1415770_at   | 83669 WD repeat domain 6                                                                                    | -7.0  |
| 1451305_at   | 73739 PKD2 interactor, golgi and endoplasmic reticulum associated 1                                         | -7.0  |
| 1417969_at   | 76454 F-box only protein 31                                                                                 | -6.9  |
| 1415984_at   | 11364 acetyl-Coenzyme A dehydrogenase, medium chain                                                         | -6.8  |
| 1424334_at   | 74257 tetraspanin 17                                                                                        | -6.8  |
| 1426369_at   | 67420 male sterility domain containing 2                                                                    | -6.7  |
| 1429390_at   | 235534 acid phosphatase-like 2                                                                              | -6.6  |
| 1427904_s_at | 73694 RIKEN cDNA 2410091C18 gene                                                                            | -6.6  |
| 1416256_a_at | 22154 tubulin, beta 5                                                                                       | -6.5  |
| 1417056_at   | 19186 proteasome (prosome, macropain) 28 subunit, alpha                                                     | -6.4  |
| 1449147_at   | 76969 carbohydrate (keratan sulfate Gal-6) sulfotransferase 1                                               | -6.4  |
| 1428600_at   | 73198 RIKEN cDNA 3110068G20 gene                                                                            | -6.4  |
| 1423282_at   | 18738 phosphatidylinositol transfer protein, alpha                                                          | -6.4  |
| 1416946_a_at | 113868 /// acetyl-Coenzyme A acyltransferase 1 /// 3-ketoacyl-CoA thiolase B                                | -6.4  |
|              | 235674                                                                                                      |       |
| 1448533_at   | 66411 cytoskeleton-associated protein 1                                                                     | -6.3  |
| 1452540_a_at | 319179 /// histone 1, H2bc /// histone 1, H2be /// histone 1, H2bl /// histone 1, H2bm /// histone 1, H2bp  | -6.1  |
|              | 319185 ///                                                                                                  |       |
|              | 319186 ///                                                                                                  |       |
|              | 319188 ///                                                                                                  |       |
|              | 68024                                                                                                       |       |
| 1427347_s_at | 22151 /// tubulin, beta 2 /// RIKEN cDNA 2410129E14 gene /// similar to TUBULIN BETA CHAIN (T BETA-         | -6.1  |
|              | 544939 /// 15)                                                                                              |       |
|              | 73710                                                                                                       |       |
| 1416066_at   | 12527 CD9 antigen                                                                                           | -6.1  |
| 1421997_s_at | 16400 integrin alpha 3                                                                                      | -5.9  |
| 1434997_at   | 78334 cell division cycle 2-like 6 (CDK8-like)                                                              | -5.8  |
| 1428321_at   | 68519 echinoderm microtubule associated protein like 1                                                      | -5.6  |
| 1416536_at   | 68114 melanoma associated antigen (mutated) 1                                                               | -5.6  |
| 1418840_at   | 18569 programmed cell death 4                                                                               | -5.6  |
| 1423771_at   | 109042 protein kinase C, delta binding protein                                                              | -5.6  |
| 1449481_at   | 50799 solute carrier family 25 (mitochondrial carrier, adenine nucleotide translocator), member 13          | -5.5  |
| 1418463_at   | 18709 phosphatidylinositol 3-kinase, regulatory subunit, polypeptide 2 (p85 beta)                           | -5.5  |
| 1452301_at   | 67689 aldehyde dehydrogenase 3 family, member B1                                                            | -5.4  |
| 1415812_at   | 227753 gelsolin                                                                                             | -5.4  |
| 1418884_x_at | 22142 tubulin, alpha 1                                                                                      | -5.4  |
| 1450920_at   | 12442 cyclin B2                                                                                             | -5.4  |
| 1418737_at   | 66401 nudix (nucleoside diphosphate linked moiety X)-type motif 2                                           | -5.3  |
| 1448960_at   | 67393 CXXC finger 5                                                                                         | -5.3  |
| 1460732_a_at | 19041 periplakin                                                                                            | -5.3  |
| 1426690_a_at | 20787 sterol regulatory element binding factor 1                                                            | -5.3  |
| 1424542_at   | 20198 S100 calcium binding protein A4                                                                       | -5.3  |
| 1423484_at   | 83675 bicaudal C homolog 1 (Drosophila)                                                                     | -5.3  |

|              |                                                                                           |      |
|--------------|-------------------------------------------------------------------------------------------|------|
| 1418924_at   | 66985 RIKEN cDNA 2400009B11 gene                                                          | -5.2 |
| 1416868_at   | 12580 cyclin-dependent kinase inhibitor 2C (p18, inhibits CDK4)                           | -5.2 |
| 1460257_a_at | 107885 5, 10-methenyltetrahydrofolate synthetase                                          | -5.2 |
| 1436747_at   | 319370 /// RIKEN cDNA 1110014K08 gene /// similar to RIKEN cDNA 1110014K08 gene<br>545968 | -5.1 |
| 1419449_a_at | 14678 guanine nucleotide binding protein, alpha inhibiting 2                              | -5.1 |
| 1423538_at   | 18203 N-terminal Asn amidase                                                              | -5.1 |
| 1418496_at   | 15375 forkhead box A1                                                                     | -5.1 |
| 1416497_at   | 12304 protein disulfide isomerase associated 4                                            | -5.1 |
| 1455031_at   |                                                                                           | -5.0 |
| 1421161_at   | 12223 betacellulin, epidermal growth factor family member                                 | -4.9 |
| 1428393_at   | 68404 neuritin 1                                                                          | -4.9 |
| 1422432_at   | 13167 diazepam binding inhibitor                                                          | -4.9 |
| 1438475_at   |                                                                                           | -4.9 |
| 1433751_at   | 227059 solute carrier family 39 (zinc transporter), member 10                             | -4.9 |
| 1457260_at   | 100224 RIKEN cDNA 7530403E16 gene                                                         | -4.9 |
| 1426942_at   | 11630 absent in melanoma 1                                                                | -4.8 |
| 1435926_at   | 98357 RIKEN cDNA E030003F13 gene                                                          | -4.8 |
| 1449254_at   | 20750 secreted phosphoprotein 1                                                           | -4.8 |
| 1415897_a_at | 56615 microsomal glutathione S-transferase 1                                              | -4.7 |
| 1448956_at   | 56018 START domain containing 10                                                          | -4.7 |
| 1436796_at   | 68827 RIKEN cDNA 1110061A14 gene                                                          | -4.7 |
| 1416044_at   | 14248 flightless I homolog (Drosophila)                                                   | -4.7 |
| 1460216_at   | 11409 acyl-Coenzyme A dehydrogenase, short chain                                          | -4.7 |
| 1460737_at   | 18518 immunoglobulin (CD79A) binding protein 1                                            | -4.7 |
| 1417852_x_at | 12722 chloride channel calcium activated 1                                                | -4.7 |
| 1423394_at   | 66881 prenylcysteine oxidase 1                                                            | -4.6 |
| 1452908_at   | 64451 disco interacting protein 2 homolog (Drosophila)                                    | -4.6 |
| 1424014_at   | 67278 RIKEN cDNA 2900092E17 gene                                                          | -4.6 |
| 1420046_s_at | 68877 MAF1 homolog (S. cerevisiae)                                                        | -4.6 |
| 1423924_s_at | 52588 tetraspanin 14                                                                      | -4.6 |
| 1425194_a_at | 67788 RIKEN cDNA 6330577E15 gene                                                          | -4.6 |
| 1417450_a_at | 21335 transforming, acidic coiled-coil containing protein 3                               | -4.6 |
| 1433581_at   | 68861 RIKEN cDNA 1190002N15 gene                                                          | -4.6 |
| 1418671_at   | 12337 calpain 5                                                                           | -4.5 |
| 1415760_s_at | 11927 ATX1 (antioxidant protein 1) homolog 1 (yeast)                                      | -4.5 |
| 1423870_at   | 108909 RIKEN cDNA 2610208M17 gene                                                         | -4.5 |
| 1421654_a_at | 16905 lamin A                                                                             | -4.5 |
| 1421821_at   | 16835 low density lipoprotein receptor                                                    | -4.5 |
| 1417083_at   | 66212 Sec61 beta subunit                                                                  | -4.4 |
| 1416364_at   | 15516 heat shock protein 1, beta                                                          | -4.4 |
| 1416374_at   | 55946 adaptor-related protein complex 3, mu 1 subunit                                     | -4.4 |
| 1426669_at   | 223978 RIKEN cDNA C530044N13 gene                                                         | -4.4 |
| 1424140_at   | 74246 galactose-4-epimerase, UDP                                                          | -4.3 |
| 1455604_at   | 545325 hypothetical protein LOC545325                                                     | -4.3 |
| 1428145_at   | 52538 acetyl-Coenzyme A acyltransferase 2 (mitochondrial 3-oxoacyl-Coenzyme A thiolase)   | -4.3 |
| 1423712_a_at | 97541 glutaminyl-tRNA synthetase                                                          | -4.3 |
| 1428082_at   | 433256 acyl-CoA synthetase long-chain family member 5                                     | -4.3 |
| 1453307_a_at | 59008 anaphase-promoting complex subunit 5                                                | -4.3 |
| 1450862_at   | 19366 RAD54 like (S. cerevisiae)                                                          | -4.3 |
| 1438483_at   |                                                                                           | -4.3 |
| 1417633_at   | 20657 superoxide dismutase 3, extracellular                                               | -4.2 |
| 1452398_at   | 74055 phospholipase C, epsilon 1                                                          | -4.2 |
| 1415977_at   | 71780 myo-inositol 1-phosphate synthase A1                                                | -4.2 |
| 1417219_s_at | 19240 thymosin, beta 10                                                                   | -4.2 |
| 1439296_at   | 18824 Proteolipid protein 2                                                               | -4.2 |
| 1450396_at   | 20843 stromal antigen 2                                                                   | -4.2 |
| 1424577_at   | 229524 cDNA sequence BC008103                                                             | -4.2 |
| 1432202_a_at | 70235 WD repeat domain 51A                                                                | -4.2 |
| 1418704_at   | 20196 S100 calcium binding protein A13                                                    | -4.2 |
| 1426778_at   | 13138 dystroglycan 1                                                                      | -4.2 |
| 1428903_at   | 73172 RIKEN cDNA 3110037I16 gene                                                          | -4.2 |
| 1435649_at   | 68810 nexilin                                                                             | -4.2 |
| 1423790_at   | 223453 death-associated protein                                                           | -4.1 |
| 1430332_a_at | 110006 glucuronidase, beta                                                                | -4.1 |
| 1453634_a_at | 67397 endoplasmic reticulum protein 29                                                    | -4.1 |
| 1423732_at   | 72265 translocating chain-associating membrane protein 1                                  | -4.1 |
| 1434037_s_at | 18519 p300/CBP-associated factor                                                          | -4.1 |
| 1451322_at   | 69574 RIKEN cDNA 2310016A09 gene                                                          | -4.1 |
| 1416311_s_at | 22144 /// tubulin, alpha 3 /// tubulin, alpha 7<br>22147                                  | -4.1 |
| 1425173_s_at | 229593 golgi phosphoprotein 3-like                                                        | -4.1 |



|              |                                                                                                                                         |      |
|--------------|-----------------------------------------------------------------------------------------------------------------------------------------|------|
| 1435083_at   | 330695 cortexin                                                                                                                         | -4.1 |
| 1424062_at   | 216080 ubiquitin-conjugating enzyme E2D 1, UBC4/5 homolog (yeast)                                                                       | -4.0 |
| 1426306_a_at | 80884 melanoma antigen, family D, 2                                                                                                     | -4.0 |
| 1454671_at   | 231070 insulin induced gene 1                                                                                                           | -4.0 |
| 1419927_s_at | 98710 RAB interacting factor                                                                                                            | -4.0 |
| 1422853_at   | 20416 src homology 2 domain-containing transforming protein C1                                                                          | -4.0 |
| 1433868_at   |                                                                                                                                         | -4.0 |
| 1443858_at   | 10 days neonate cortex cDNA, RIKEN full-length enriched library, clone:A830054P04<br>product:unknown EST, full insert sequence          | -4.0 |
| 1426710_at   | 12315 calmodulin 3                                                                                                                      | -4.0 |
| 1428588_a_at | 67228 RIKEN cDNA 2810443J12 gene                                                                                                        | -4.0 |
| 1429089_s_at | 243219 RIKEN cDNA 2900026A02 gene                                                                                                       | -4.0 |
| 1416607_at   | 70984 RIKEN cDNA 4931406C07 gene                                                                                                        | -4.0 |
| 1451560_at   | 233210 cDNA sequence BC058674                                                                                                           | -4.0 |
| 1427447_a_at | 110253 TRIO and F-actin binding protein                                                                                                 | -4.0 |
| 1416988_at   | 17685 mutS homolog 2 (E. coli)                                                                                                          | -3.9 |
| 1449542_at   | 18514 pre B-cell leukemia transcription factor 1                                                                                        | -3.9 |
| 1417662_at   | 13713 ELK3, member of ETS oncogene family                                                                                               | -3.9 |
| 1422502_at   | 11545 poly (ADP-ribose) polymerase family, member 1                                                                                     | -3.9 |
| 1438527_at   | 244512 /// ribosomal protein L3 /// similar to 60S ribosomal protein L3 (L4) /// similar to Ribosomal protein L3<br>27367 ///<br>433745 | -3.9 |
| 1416860_s_at | 26356 inhibitor of growth family, member 1                                                                                              | -3.9 |
| 1419031_at   | 56473 fatty acid desaturase 2                                                                                                           | -3.9 |
| 1428522_at   | 74044 Transcription termination factor, RNA polymerase II                                                                               | -3.9 |
| 1426971_at   | 74153 ubiquitin-activating enzyme E1-like                                                                                               | -3.9 |
| 1451643_a_at | 19342 RAB4B, member RAS oncogene family                                                                                                 | -3.9 |
| 1420416_at   | 20346 sema domain, immunoglobulin domain (Ig), short basic domain, secreted, (semaphorin) 3A                                            | -3.9 |
| 1416155_at   | 15354 high mobility group box 3                                                                                                         | -3.9 |
| 1426621_a_at | 72930 protein phosphatase 2 (formerly 2A), regulatory subunit B (PR 52), beta isoform                                                   | -3.8 |
| 1418157_at   | 13865 nuclear receptor subfamily 2, group F, member 1                                                                                   | -3.8 |
| 1440880_at   | 225651 metallophosphoesterase 1                                                                                                         | -3.8 |
| 1452861_at   | 72097 RIKEN cDNA 2010300C02 gene                                                                                                        | -3.8 |
| 1428707_at   | 69202 RIKEN cDNA 2610009E16 gene                                                                                                        | -3.8 |
| 1435323_a_at | 218121 O-acyltransferase (membrane bound) domain containing 1                                                                           | -3.8 |
| 1415718_at   | 50724 RIKEN cDNA 2310079P12 gene                                                                                                        | -3.8 |
| 1417178_at   | 54120 GIPC PDZ domain containing family, member 2                                                                                       | -3.8 |
| 1418238_at   | 56357 isovaleryl coenzyme A dehydrogenase                                                                                               | -3.8 |
| 1426873_s_at | 16480 junction plakoglobin                                                                                                              | -3.8 |
| 1434365_a_at | 381306 similar to hypothetical protein FLJ10706                                                                                         | -3.8 |
| 1423846_x_at | 22143 tubulin, alpha 2                                                                                                                  | -3.8 |
| 1416866_at   | 12068 blocked early in transport 1 homolog (S. cerevisiae)                                                                              | -3.8 |
| 1433465_a_at | 101602 expressed sequence AI467606                                                                                                      | -3.8 |
| 1416269_at   | 57423 ATP synthase, H+ transporting, mitochondrial F0 complex, subunit f, isoform 2                                                     | -3.7 |
| 1417044_at   | 30949 leucine carboxyl methyltransferase 1                                                                                              | -3.7 |
| 1433639_at   | 215512 RIKEN cDNA 5730593F17 gene                                                                                                       | -3.7 |
| 1456878_at   | 192734 expressed sequence AI646023                                                                                                      | -3.7 |
| 1416967_at   | 20674 SRY-box containing gene 2                                                                                                         | -3.7 |
| 1425580_a_at | 225326 phosphoinositide-3-kinase, class 3                                                                                               | -3.7 |
| 1416558_at   | 17279 maternal embryonic leucine zipper kinase                                                                                          | -3.7 |
| 1434748_at   | 80986 cytoskeleton associated protein 2                                                                                                 | -3.7 |
| 1440094_at   | 407795 cDNA sequence BC030870                                                                                                           | -3.7 |
| 1415906_at   | 19241 thymosin, beta 4, X chromosome                                                                                                    | -3.6 |
| 1421313_s_at | 13043 cortactin                                                                                                                         | -3.6 |
| 1460718_s_at | 56462 mitochondrial carrier homolog 1 (C. elegans)                                                                                      | -3.6 |
| 1423599_a_at | 67466 phosducin-like                                                                                                                    | -3.6 |
| 1428322_a_at | 68342 NADH dehydrogenase (ubiquinone) 1 beta subcomplex, 10                                                                             | -3.6 |
| 1431375_s_at | 57342 parvin, alpha                                                                                                                     | -3.6 |
| 1448491_at   | 51798 enoyl coenzyme A hydratase 1, peroxisomal                                                                                         | -3.6 |
| 1460241_a_at | 20454 ST3 beta-galactoside alpha-2,3-sialyltransferase 5                                                                                | -3.6 |
| 1424157_at   | 259300 EH-domain containing 2                                                                                                           | -3.6 |
| 1448967_at   | 66536 nipsnap homolog 3A (C. elegans)                                                                                                   | -3.6 |
| 1451306_at   | 217946 cell division cycle associated 7 like                                                                                            | -3.6 |
| 1416468_at   | 11668 aldehyde dehydrogenase family 1, subfamily A1                                                                                     | -3.6 |
| 1434787_at   | 105930 expressed sequence AI854770                                                                                                      | -3.6 |
| 1415698_at   | 105348 golgi phosphoprotein 2                                                                                                           | -3.6 |
| 1416778_at   | 20324 serum deprivation response                                                                                                        | -3.6 |
| 1416000_a_at | 18477 peroxiredoxin 1                                                                                                                   | -3.5 |
| 1422837_at   | 64929 sciellin                                                                                                                          | -3.5 |
| 1449056_at   | 243780 RIKEN cDNA E330009J07 gene                                                                                                       | -3.5 |
| 1418665_at   | 114663 inositol (myo)-1(or 4)-monophosphatase 2                                                                                         | -3.5 |
| 1448211_at   | 76252 ATPase, H+ transporting, lysosomal, V0 subunit E isoform 2                                                                        | -3.5 |

|              |                                                                                                         |      |
|--------------|---------------------------------------------------------------------------------------------------------|------|
| 1436373_at   | 269881 mitogen activated protein kinase kinase kinase 10                                                | -3.5 |
| 1420498_a_at | 13132 disabled homolog 2 (Drosophila)                                                                   | -3.5 |
| 1452919_a_at | 67078 RIKEN cDNA 1700012G19 gene                                                                        | -3.5 |
| 1417311_at   | 68337 cysteine rich protein 2                                                                           | -3.5 |
| 1418532_at   | 57265 frizzled homolog 2 (Drosophila)                                                                   | -3.5 |
| 1428074_at   | 72309 RIKEN cDNA 2310037P21 gene                                                                        | -3.5 |
| 1438634_x_at | 16796 LIM and SH3 protein 1                                                                             | -3.5 |
| 1416589_at   | 20692 secreted acidic cysteine rich glycoprotein                                                        | -3.4 |
| 1426716_at   | 100121 tudor domain containing 7                                                                        | -3.4 |
| 1448468_a_at | 16497 potassium voltage-gated channel, shaker-related subfamily, beta member 1                          | -3.4 |
| 1439050_at   | 99692 expressed sequence A1649393                                                                       | -3.4 |
| 1424226_at   | 217830 RIKEN cDNA 9030617O03 gene                                                                       | -3.4 |
| 1416319_at   | 11534 adenosine kinase                                                                                  | -3.4 |
| 1422499_at   | 65970 DNA segment, Chr 15, ERATO Doi 366, expressed                                                     | -3.4 |
| 1448519_at   | 21677 TEA domain family member 2                                                                        | -3.4 |
| 1455056_at   | 380928 LIM domain only 7                                                                                | -3.4 |
| 1441272_at   | 17184 Matrin 3                                                                                          | -3.4 |
| 1448300_at   | 66447 microsomal glutathione S-transferase 3                                                            | -3.4 |
| 1416068_at   | 85305 lysyl-tRNA synthetase                                                                             | -3.4 |
| 1418467_at   | 66993 SWI/SNF related, matrix associated, actin dependent regulator of chromatin, subfamily d, member 3 | -3.4 |
| 1434228_at   | 381511 protein phosphatase 2C, magnesium dependent, catalytic subunit                                   | -3.4 |
| 1434119_at   | 227695 DNA segment, Chr 2, Wayne State University 81, expressed                                         | -3.4 |
| 1428382_at   | 68094 SWI/SNF related, matrix associated, actin dependent regulator of chromatin, subfamily c, member 2 | -3.4 |
| 1448244_at   | 18777 lysophospholipase 1                                                                               | -3.3 |
| 1421546_a_at | 26934 Rac GTPase-activating protein 1                                                                   | -3.3 |
| 1424394_at   | 114679 selenoprotein M                                                                                  | -3.3 |
| 1452346_at   | 108902 UDP-GlcNAc:betaGal beta-1,3-N-acetylglucosaminyltransferase 6                                    | -3.3 |
| 1416125_at   | 14229 FK506 binding protein 5                                                                           | -3.3 |
| 1423212_at   | 13619 polyhomeotic-like 1 (Drosophila)                                                                  | -3.3 |
| 1438322_x_at | 14137 farnesyl diphosphate farnesyl transferase 1                                                       | -3.3 |
| 1448196_at   | 108645 methionine adenosyltransferase II, beta                                                          | -3.3 |
| 1423706_a_at | 110208 phosphogluconate dehydrogenase                                                                   | -3.3 |
| 1449901_a_at | 53608 mitogen-activated protein kinase kinase kinase 6                                                  | -3.3 |
| 1423782_at   | 232157 MOB1, Mps One Binder kinase activator-like 1B (yeast)                                            | -3.3 |
| 1416897_at   | 80285 poly (ADP-ribose) polymerase family, member 9                                                     | -3.3 |
| 1437290_at   | 242291 RIKEN cDNA 1110001C20 gene                                                                       | -3.2 |
| 1449207_a_at | 19348 kinesin family member 20A                                                                         | -3.2 |
| 1416028_a_at | 15374 hematological and neurological expressed sequence 1                                               | -3.2 |
| 1416258_at   | 21877 thymidine kinase 1                                                                                | -3.2 |
| 1422438_at   | 13849 epoxide hydrolase 1, microsomal                                                                   | -3.2 |
| 1423946_at   | 213019 PDZ and LIM domain 2                                                                             | -3.2 |
| 1421832_at   | 65960 twisted gastrulation homolog 1 (Drosophila)                                                       | -3.2 |
| 1426499_at   | 227700 SH3-domain GRB2-like endophilin B2                                                               | -3.2 |
| 1423246_at   | 76299 thioredoxin domain containing 4 (endoplasmic reticulum)                                           | -3.2 |
| 1424829_at   | 227612 RIKEN cDNA A830007P12 gene                                                                       | -3.2 |
| 1428431_at   | 71918 RIKEN cDNA 2310047A01 gene                                                                        | -3.2 |
| 1417427_at   | 68209 RIKEN cDNA 1500026D16 gene                                                                        | -3.2 |
| 1448619_at   | 13360 7-dehydrocholesterol reductase                                                                    | -3.2 |
| 1452887_at   | 74019 TNF receptor-associated factor 3 interacting protein 1                                            | -3.2 |
| 1423493_a_at | 18032 nuclear factor I/X                                                                                | -3.2 |
| 1423813_at   | 110033 kinesin family member 22                                                                         | -3.2 |
| 1426434_at   | 74122 transmembrane protein 43                                                                          | -3.2 |
| 1417460_at   | 80876 interferon induced transmembrane protein 2                                                        | -3.2 |
| 1417777_at   | 67103 leukotriene B4 12-hydroxydehydrogenase                                                            | -3.2 |
| 1451356_at   | 66471 acidic (leucine-rich) nuclear phosphoprotein 32 family, member E                                  | -3.2 |
| 1456603_at   | 76566 RIKEN cDNA 1500005K14 gene                                                                        | -3.2 |
| 1435384_at   | 93765 ubiquitin-conjugating enzyme E2N                                                                  | -3.2 |
| 1452330_a_at | 74761 matrix-remodelling associated 8                                                                   | -3.1 |
| 1417161_at   | 52004 CDK2-associated protein 2                                                                         | -3.1 |
| 1451835_at   | 223227 SRY-box containing gene 21                                                                       | -3.1 |
| 1423463_a_at | 51944 DNA segment, Chr 2, ERATO Doi 750, expressed                                                      | -3.1 |
| 1434311_at   | 231464 CCR4-NOT transcription complex, subunit 6-like                                                   | -3.1 |
| 1448380_at   | 19039 lectin, galactoside-binding, soluble, 3 binding protein                                           | -3.1 |
| 1451884_a_at | 27756 LSM2 homolog, U6 small nuclear RNA associated (S. cerevisiae)                                     | -3.1 |
| 1453229_s_at | 66576 ubiquinol-cytochrome c reductase hinge protein                                                    | -3.1 |
| 1416200_at   | 77125 RIKEN cDNA 9230117N10 gene                                                                        | -3.1 |
| 1440409_at   | 70075 RIKEN cDNA 2210401J11 gene                                                                        | -3.1 |
| 1416657_at   | 11651 thymoma viral proto-oncogene 1                                                                    | -3.1 |
| 1417147_at   | 56279 RIKEN cDNA B230317C12 gene                                                                        | -3.1 |
| 1420637_at   | 110639 phosphoribosyl pyrophosphate synthetase 2                                                        | -3.1 |

|              |                                                                                                    |      |
|--------------|----------------------------------------------------------------------------------------------------|------|
| 1428405_at   | 353502 host cell factor C1 regulator 1 (XPO1-dependent)                                            | -3.1 |
| 1435630_s_at | 110460 acetyl-Coenzyme A acetyltransferase 2                                                       | -3.1 |
| 1423071_x_at | 68157 RIKEN cDNA 6720475J19 gene                                                                   | -3.1 |
| 1423034_at   | 52700 thioredoxin-like 5                                                                           | -3.1 |
| 1416261_at   | 67226 transmembrane protein 19                                                                     | -3.1 |
| 1435735_x_at | 109815 histocompatibility 47                                                                       | -3.1 |
| 1436316_at   | 109249 RIKEN cDNA 9430029L20 gene                                                                  | -3.1 |
| 1415753_at   | 216169 DNA segment, Chr 10, Brigham & Women's Genetics 1364 expressed                              | -3.1 |
| 1438402_at   | 269233 RIKEN cDNA 9630050M13 gene                                                                  | -3.1 |
| 1419582_at   | 72082 cytochrome P450, family 2, subfamily c, polypeptide 55                                       | -3.0 |
| 1422525_at   | 11958 ATP synthase, H+ transporting, mitochondrial F1F0 complex, subunit e                         | -3.0 |
| 1423119_at   | 66832 radial spokehead-like 2                                                                      | -3.0 |
| 1425804_at   | 15372 H6 homeo box 2                                                                               | -3.0 |
| 1428819_at   | 13589 microtubule-associated protein, RP/EB family, member 1                                       | -3.0 |
| 1450409_a_at | 67739 RIKEN cDNA 4930570C03 gene                                                                   | -3.0 |
| 1451103_at   | 219072 DNA segment, Chr 14, ERATO Doi 500, expressed                                               | -3.0 |
| 1428296_at   | 66491 polymerase (RNA) II (DNA directed) polypeptide L                                             | -3.0 |
| 1452680_at   | 107686 small nuclear ribonucleoprotein D2                                                          | -3.0 |
| 1420668_a_at | 74766 Yip1 domain family, member 2                                                                 | -3.0 |
| 1434386_at   | 235574 ATPase, Ca++-sequestering                                                                   | -3.0 |
| 1434891_at   | 19221 prostaglandin F2 receptor negative regulator                                                 | -3.0 |
| 1435982_at   | 100226 syntaxin 12                                                                                 | -3.0 |
| 1422407_s_at | 15461 Harvey rat sarcoma virus oncogene 1                                                          | -3.0 |
| 1425616_a_at | 69216 RIKEN cDNA 2410005K17 gene                                                                   | -3.0 |
| 1417445_at   | 67052 kinetochore associated 2                                                                     | -3.0 |
| 1422444_at   | 16403 integrin alpha 6                                                                             | -3.0 |
| 1455562_at   | 20667 SRY-box containing gene 12                                                                   | -3.0 |
| 1421824_at   | 23821 beta-site APP cleaving enzyme 1                                                              | -3.0 |
| 1422653_at   | 68121 RIKEN cDNA C030018L16 gene                                                                   | -3.0 |
| 1423650_at   | 545856 similar to Rnf26 protein                                                                    | -3.0 |
| 1448279_at   | 56378 actin related protein 2/3 complex, subunit 3                                                 | -3.0 |
| 1419259_at   | 20163 Ras suppressor protein 1                                                                     | -3.0 |
| 1423717_at   | 56248 adenylate kinase 3                                                                           | -3.0 |
| 1438076_at   | 19946 ribosomal protein L30                                                                        | -3.0 |
| 1448095_at   | Transcribed locus                                                                                  | -3.0 |
| 1438055_at   | 109222 retinoic acid receptor responder (tazarotene induced) 1                                     | -3.0 |
| 1460035_at   | 12034 B-cell receptor-associated protein 37                                                        | -3.0 |
| 1435524_at   | 69895 RIKEN cDNA 2010109N14 gene                                                                   | -3.0 |
| 1423940_at   | 68090 Yip1 interacting factor homolog (S. cerevisiae)                                              | -3.0 |
| 1451172_at   | 67808 RIKEN cDNA 1200015A19 gene                                                                   | -2.9 |
| 1428325_at   | 66455 RIKEN cDNA 2610019P18 gene                                                                   | -2.9 |
| 1431322_at   | 78908 immunoglobulin superfamily, member 3                                                         | -2.9 |
| 1417893_at   | 94280 sideroflexin 3                                                                               | -2.9 |
| 1420619_a_at | 14797 amino-terminal enhancer of split                                                             | -2.9 |
| 1424882_a_at | 70021 RIKEN cDNA 2510015F01 gene                                                                   | -2.9 |
| 1424895_at   | 76123 G-protein signalling modulator 2 (AGS3-like, C. elegans)                                     | -2.9 |
| 1430533_a_at | 12387 catenin (cadherin associated protein), beta 1, 88kDa                                         | -2.9 |
| 1448810_at   | 50798 glucosamine                                                                                  | -2.9 |
| 1428795_at   | 76306 RIKEN cDNA 1110021L09 gene                                                                   | -2.9 |
| 1428821_at   | 67512 1-acylglycerol-3-phosphate O-acyltransferase 2 (lysophosphatidic acid acyltransferase, beta) | -2.9 |
| 1416340_a_at | 17159 mannosidase 2, alpha B1                                                                      | -2.9 |
| 1423723_s_at | 230908 TAR DNA binding protein                                                                     | -2.9 |
| 1433504_at   | 110078 brain glycogen phosphorylase                                                                | -2.9 |
| 1428416_at   | 67306 RIKEN cDNA 3110050N22 gene                                                                   | -2.9 |
| 1455381_at   | 320675 RIKEN cDNA 4921513D23 gene                                                                  | -2.9 |
| 1416667_at   | 13595 phenylalkylamine Ca2+ antagonist (emopamil) binding protein                                  | -2.9 |
| 1420810_at   | 56398 RIKEN cDNA 1500003O03 gene                                                                   | -2.9 |
| 1422513_at   | 12449 cyclin F                                                                                     | -2.9 |
| 1424531_a_at | 21401 transcription elongation factor A (SII), 3                                                   | -2.9 |
| 1437165_a_at | 18542 procollagen C-proteinase enhancer protein                                                    | -2.9 |
| 1424562_a_at | 11739 solute carrier family 25 (mitochondrial carrier, adenine nucleotide translocator), member 4  | -2.9 |
| 1433789_at   | 399101 RNA, U17d small nucleolar                                                                   | -2.9 |
| 1434543_a_at | 66162 RIKEN cDNA 1110025L05 gene                                                                   | -2.9 |
| 1435450_at   | 70568 copine III                                                                                   | -2.9 |
| 1416429_a_at | 12359 catalase                                                                                     | -2.9 |
| 1416529_at   | 13730 epithelial membrane protein 1                                                                | -2.9 |
| 1454753_at   | 108657 arginyl aminopeptidase (aminopeptidase B)-like 1                                            | -2.9 |
| 1417403_at   | 170439 ELOVL family member 6, elongation of long chain fatty acids (yeast)                         | -2.9 |
| 1456077_x_at |                                                                                                    | -2.9 |
| 1434825_at   | 381742 similar to CAGL79                                                                           | -2.8 |
| 1454658_at   | 216136 ilvB (bacterial acetolactate synthase)-like                                                 | -2.8 |

|              |                                                                                                    |      |
|--------------|----------------------------------------------------------------------------------------------------|------|
| 1416137_at   | 11750 annexin A7                                                                                   | -2.8 |
| 1416503_at   | 17035 latexin                                                                                      | -2.8 |
| 1420835_at   | 67554 solute carrier family 25, member 30                                                          | -2.8 |
| 1423960_at   | 14792 gene rich cluster, C3f gene                                                                  | -2.8 |
| 1433702_at   | 226090 DNA segment, Chr 19, Wayne State University 12, expressed                                   | -2.8 |
| 1416288_at   | 15502 DnaJ (Hsp40) homolog, subfamily A, member 1                                                  | -2.8 |
| 1418460_at   | 27059 SH3 domain protein D19                                                                       | -2.8 |
| 1422603_at   | 58809 ribonuclease, RNase A family 4                                                               | -2.8 |
| 1418072_at   | 68024 histone 1, H2bc                                                                              | -2.8 |
| 1426774_at   | 243771 poly (ADP-ribose) polymerase family, member 12                                              | -2.8 |
| 1437073_x_at | 105633 expressed sequence AV025504                                                                 | -2.8 |
| 1424118_a_at | 66442 spindle pole body component 25 homolog (S. cerevisiae)                                       | -2.8 |
| 1428853_at   | 19206 patched homolog 1                                                                            | -2.8 |
| 1448609_at   | 22117 thiosulfate sulfurtransferase, mitochondrial                                                 | -2.8 |
| 1455685_at   | 330631 hypothetical protein 9530064J02                                                             | -2.8 |
| 1428180_at   | 75620 RIKEN cDNA 2810422J05 gene                                                                   | -2.8 |
| 1416453_x_at | 20042 /// ribosomal protein S12 /// similar to ribosomal protein S12                               | -2.8 |
|              | 546370                                                                                             |      |
| 1431081_a_at | 70310 phospholipid scramblase 3                                                                    | -2.8 |
| 1424917_a_at | 52639 DNA segment, Chr 11, ERATO Doi 498, expressed                                                | -2.7 |
| 1449151_at   | 18557 PCTAIRE-motif protein kinase 3                                                               | -2.7 |
| 1438868_at   | 219132 DNA segment, Chr 14, ERATO Doi 668, expressed                                               | -2.7 |
| 1428065_at   | 68682 RIKEN cDNA 1110028E10 gene                                                                   | -2.7 |
| 1428580_at   | 109778 biliverdin reductase A                                                                      | -2.7 |
| 1428738_a_at | 66039 DNA segment, Chr 14, ERATO Doi 449, expressed                                                | -2.7 |
| 1437632_at   | Transcribed locus                                                                                  | -2.7 |
| 1415964_at   | 20249 stearoyl-Coenzyme A desaturase 1                                                             | -2.7 |
| 1426297_at   | 21423 transcription factor E2a                                                                     | -2.7 |
| 1416079_a_at | 56443 actin related protein 2/3 complex, subunit 1A                                                | -2.7 |
| 1418318_at   | 66889 ring finger protein 128                                                                      | -2.7 |
| 1438118_x_at | 22352 vimentin                                                                                     | -2.7 |
| 1434911_s_at | 71085 Rho GTPase activating protein 19                                                             | -2.7 |
| 1416555_at   | 13663 etoposide induced 2.4 mRNA                                                                   | -2.7 |
| 1418300_a_at | 17347 MAP kinase-interacting serine/threonine kinase 2                                             | -2.7 |
| 1420427_a_at | 101437 DEAH (Asp-Glu-Ala-His) box polypeptide 32                                                   | -2.7 |
| 1424877_a_at | 17025 aminolevulinate, delta-, dehydratase                                                         | -2.7 |
| 1449163_at   | 24058 expressed sequence AI256711                                                                  | -2.7 |
| 1450627_at   | 11732 progressive ankylosis                                                                        | -2.7 |
| 1419027_s_at | 56356 glycolipid transfer protein                                                                  | -2.7 |
| 1416410_at   | 18476 platelet-activating factor acetylhydrolase, isoform 1b, alpha1 subunit                       | -2.7 |
| 1430640_a_at | 19088 protein kinase, cAMP dependent regulatory, type II beta                                      | -2.7 |
| 1448592_at   | 56693 cartilage associated protein                                                                 | -2.7 |
| 1453380_a_at | 68876 RIKEN cDNA 2410012H02 gene                                                                   | -2.7 |
| 1427990_at   | 77593 ubiquitin specific protease 45                                                               | -2.6 |
| 1416076_at   | 12429 /// cyclin B1, related sequence 1 /// cyclin B1 /// similar to G2/mitotic-specific cyclin B1 | -2.6 |
|              | 268697 ///                                                                                         |      |
|              | 434175                                                                                             |      |
| 1416664_at   | 107995 cell division cycle 20 homolog (S. cerevisiae)                                              | -2.6 |
| 1426146_a_at | 212862 choline phosphotransferase 1                                                                | -2.6 |
| 1449125_at   | 66443 tumor necrosis factor, alpha-induced protein 8-like 1                                        | -2.6 |
| 1450431_a_at | 17999 neural precursor cell expressed, developmentally down-regulated gene 4                       | -2.6 |
| 1452754_at   | 76737 RIKEN cDNA 5730592L21 gene                                                                   | -2.6 |
| 1416032_at   | 68539 RIKEN cDNA 1110006I15 gene                                                                   | -2.6 |
| 1417419_at   | 12443 cyclin D1                                                                                    | -2.6 |
| 1418818_at   | 11830 aquaporin 5                                                                                  | -2.6 |
| 1434027_at   | 53902 Down syndrome critical region gene 1-like 2                                                  | -2.6 |
| 1448129_at   | 67771 actin related protein 2/3 complex, subunit 5                                                 | -2.6 |
| 1448943_at   | 18186 neuropilin 1                                                                                 | -2.6 |
| 1429053_at   | 68617 RIKEN cDNA 1110012J17 gene                                                                   | -2.6 |
| 1420365_a_at | 53379 heterogeneous nuclear ribonucleoprotein A2/B1                                                | -2.6 |
| 1422906_at   | 26357 ATP-binding cassette, sub-family G (WHITE), member 2                                         | -2.6 |
| 1424616_s_at |                                                                                                    | -2.6 |
| 1417245_at   | 58245 RIKEN cDNA E130016I23 gene                                                                   | -2.5 |
| 1418817_at   | 67064 chromatin modifying protein 1B                                                               | -2.5 |
| 1420930_s_at | 54366 catenin (cadherin associated protein), alpha-like 1                                          | -2.5 |
| 1422459_a_at | 23997 proteasome (prosome, macropain) 26S subunit, non-ATPase, 13                                  | -2.5 |
| 1447372_at   | 69748 aldehyde dehydrogenase 16 family, member A1                                                  | -2.5 |
| 1417114_at   | 23885 germ cell-less homolog (Drosophila)                                                          | -2.5 |
| 1423130_a_at | 20384 splicing factor, arginine/serine-rich 5 (SRp40, HRS)                                         | -2.5 |
| 1451209_at   | 71949 longevity assurance homolog 5 (S. cerevisiae)                                                | -2.5 |
| 1423423_at   | 14827 protein disulfide isomerase associated 3                                                     | -2.5 |
| 1428451_at   | 72946 leucine rich repeat containing 47                                                            | -2.5 |

|              |                                                                                                         |      |
|--------------|---------------------------------------------------------------------------------------------------------|------|
| 1419943_s_at | 268697 cyclin B1                                                                                        | -2.5 |
| 1426848_at   | 99683 SEC24 related gene family, member B (S. cerevisiae)                                               | -2.5 |
| 1423648_at   | 71853 protein disulfide isomerase associated 6                                                          | -2.5 |
| 1460214_at   | 18546 Purkinje cell protein 4                                                                           | -2.5 |
| 1416127_a_at | 13437 aspartyl aminopeptidase                                                                           | -2.4 |
| 1436019_a_at | 245828 trafficking protein particle complex 1                                                           | -2.4 |
| 1422465_a_at | 18230 nucleoredoxin                                                                                     | -2.4 |
| 1452587_at   | 66713 ARP2 actin-related protein 2 homolog (yeast)                                                      | -2.4 |
| 1422676_at   | 57376 SWI/SNF related, matrix associated, actin dependent regulator of chromatin, subfamily e, member 1 | -2.4 |
| 1416431_at   | 67951 tubulin, beta 6                                                                                   | -2.4 |
| 1419976_s_at | 18021 nuclear factor of activated T-cells, cytoplasmic, calcineurin-dependent 3                         | -2.4 |
| 1433645_at   | 70174 RIKEN cDNA 2210409B22 gene                                                                        | -2.4 |
| 1428218_a_at | 67912 RIKEN cDNA 1600012H06 gene                                                                        | -2.4 |
| 1416041_at   | 20393 serum/glucocorticoid regulated kinase                                                             | -2.3 |
| 1427094_at   | 18974 polymerase (DNA directed), epsilon 2 (p59 subunit)                                                | -2.3 |
| 1437308_s_at | 14062 coagulation factor II (thrombin) receptor                                                         | -2.3 |
| 1448647_at   | 17158 mannosidase 2, alpha 1                                                                            | -2.3 |
| 1423746_at   | 105245 thioredoxin domain containing 5                                                                  | -2.3 |
| 1417430_at   | 12585 cerebellar degeneration-related 2                                                                 | -2.3 |
| 1422184_a_at | 11636 adenylate kinase 1                                                                                | -2.2 |
| 1416928_at   | 75710 RNA binding motif protein 12                                                                      | -2.2 |
