# Supplementary material
Source: PubMed Central journal article supplement (PMC2393758)
Supplement: pnas_0800668105_13.pdf [file pnas_0800668105_13.pdf]

**Table 8. mGEP transcripts differentially expressed after Kx1 but not Kx2 infection (Kx1-specific mGEP transcripts).**

| Upregulated transcripts |         |                                                                                             |                                          |
|-------------------------|---------|---------------------------------------------------------------------------------------------|------------------------------------------|
| Affymetrix probe set ID | Gene ID | Gene description                                                                            | Fold change compared to uninfected mGEPs |
| 1420515_a_at            | 57757   | peptidoglycan recognition protein 2                                                         | 81.0                                     |
| 1441150_x_at            |         | Transcribed locus                                                                           | 43.2                                     |
| 1427381_at              | 16365   | immunoresponsive gene 1                                                                     | 39.5                                     |
| 1421682_a_at            | 21647   | t-complex-associated testis expressed 3                                                     | 37.1                                     |
| 1433963_a_at            | 108101  | cDNA sequence BC032204                                                                      | 32.2                                     |
| 1420197_at              | 17873   | Growth arrest and DNA-damage-inducible 45 beta                                              | 30.1                                     |
| 1423172_at              | 17957   | N-ethylmaleimide sensitive fusion protein attachment protein beta                           | 29.8                                     |
| 1450582_at              | 15016   | histocompatibility 2, Q region locus 5                                                      | 29.6                                     |
| 1440207_at              | 99010   | expressed sequence AI505034                                                                 | 29.5                                     |
| 1453851_a_at            | 23882   | growth arrest and DNA-damage-inducible 45 gamma                                             | 29.0                                     |
| 1417813_at              | 56489   | inhibitor of kappaB kinase epsilon                                                          | 28.6                                     |
| 1418126_at              | 20304   | chemokine (C-C motif) ligand 5                                                              | 28.4                                     |
| 1420057_at              | 107817  | Phosphatidyserine receptor                                                                  | 22.8                                     |
| 1419241_a_at            | 11634   | autoimmune regulator (autoimmune polyendocrinopathy candidiasis ectodermal dystrophy)       | 19.2                                     |
| 1427410_at              | 328425  | deleted in lymphocytic leukemia, 2                                                          | 18.9                                     |
| 1452418_at              | 319202  | RIKEN cDNA 1200016E24 gene                                                                  | 17.9                                     |
| 1457135_at              | 245827  | fat tumor suppressor homolog 2 (Drosophila)                                                 | 17.7                                     |
| 1434774_at              | 217344  | rhomboid, veinlet-like 6 (Drosophila)                                                       | 15.6                                     |
| 1434582_at              | 238988  | DNA segment, Chr 14, ERATO Doi 171, expressed                                               | 15.3                                     |
| 1420958_at              |         |                                                                                             | 15.0                                     |
| 1432466_a_at            | 11816   | apolipoprotein E                                                                            | 14.1                                     |
| 1450430_at              | 17533   | mannose receptor, C type 1                                                                  | 11.9                                     |
| 1424959_at              | 69787   | annexin A13                                                                                 | 11.1                                     |
| 1422033_a_at            | 12803   | ciliary neurotrophic factor                                                                 | 11.0                                     |
| 1448026_at              | 320790  | Chromodomain helicase DNA binding protein 7                                                 | 11.0                                     |
| 1418536_at              | 386462  | similar to MHC Q8/9d surface antigen                                                        | 10.8                                     |
| 1417812_a_at            | 16780   | laminin, beta 3                                                                             | 10.3                                     |
| 1455965_at              |         |                                                                                             | 10.1                                     |
| 1455010_at              | 68949   | RIKEN cDNA 1500012F01 gene                                                                  | 9.7                                      |
| 1428365_a_at            | 74142   | protease, serine, 15                                                                        | 9.4                                      |
| 1416920_at              | 19653   | RNA binding motif protein 4                                                                 | 8.3                                      |
| 1428306_at              | 74747   | DNA-damage-inducible transcript 4                                                           | 8.2                                      |
| 1424490_at              | 232969  | RIKEN cDNA 2410005H09 gene                                                                  | 8.2                                      |
| 1440143_at              | 239827  | RIKEN cDNA F630022B06 gene                                                                  | 8.2                                      |
| 1452684_at              | 67605   | AKT1 substrate 1 (proline-rich)                                                             | 8.2                                      |
| 1438148_at              | 330122  | gene model 1960, (NCBI)                                                                     | 8.1                                      |
| 1415899_at              | 16477   | Jun-B oncogene                                                                              | 8.0                                      |
| 1453429_at              | 78672   | RIKEN cDNA 9530057J20 gene                                                                  | 7.9                                      |
| 1452198_at              | 30841   | F-box and leucine-rich repeat protein 10                                                    | 7.8                                      |
| 1432059_x_at            | 75977   | RIKEN cDNA 5031425E22 gene                                                                  | 7.4                                      |
| 1419682_a_at            | 381406  | /// TP53 regulating kinase /// similar to mNori-2p                                          | 7.4                                      |
|                         | 76367   |                                                                                             |                                          |
| 1422470_at              | 12176   | BCL2/adenovirus E1B 19kDa-interacting protein 1, NIP3                                       | 7.3                                      |
| 1420450_at              | 17384   | matrix metalloproteinase 10                                                                 | 7.2                                      |
| 1421001_a_at            | 12353   | carbonic anhydrase 6                                                                        | 7.1                                      |
| 1432001_at              | 74843   | zinc finger, MYND domain containing 17                                                      | 7.1                                      |
| 1418465_at              | 17972   | neutrophil cytosolic factor 4                                                               | 6.9                                      |
| 1452595_at              | 240913  | a disintegrin-like and metalloprotease (repolysin type) with thrombospondin type 1 motif, 4 | 6.7                                      |
| 1449473_s_at            | 21939   | tumor necrosis factor receptor superfamily, member 5                                        | 6.6                                      |
| 1431965_at              | 71067   | RIKEN cDNA 4933411E08 gene                                                                  | 6.6                                      |
| 1422705_at              | 65112   | transmembrane, prostate androgen induced RNA                                                | 6.3                                      |
| 1449396_at              | 11754   | amine oxidase, copper containing 3                                                          | 6.3                                      |
| 1441935_at              | 68558   | ankyrin repeat, family A (RFXANK-like), 2                                                   | 6.2                                      |
| 1429726_at              | 66859   | solute carrier family 16 (monocarboxylic acid transporters), member 9                       | 6.1                                      |
| 1434372_at              |         |                                                                                             | 6.1                                      |
| 1455666_at              | 218314  | RIKEN cDNA A230042K10 gene                                                                  | 6.0                                      |
| 1421265_a_at            | 56190   | RNA-binding region (RNP1, RRM) containing 1                                                 | 6.0                                      |
| 1425681_a_at            | 26434   | prion protein dublet                                                                        | 6.0                                      |
| 1444086_at              | 210356  | RIKEN cDNA E030049G20 gene                                                                  | 6.0                                      |
| 1447494_at              | 52819   | DNA segment, Chr 7, Brigham & Women's Genetics 0826 expressed                               | 5.9                                      |
| 1427987_at              | 224902  | scaffold attachment factor B2                                                               | 5.9                                      |
| 1440346_at              | 216850  | Hypothetical LOC74273                                                                       | 5.9                                      |
| 1421267_a_at            | 17684   | Cbp/p300-interacting transactivator, with Glu/Asp-rich carboxy-terminal domain, 2           | 5.9                                      |

|              |                                                                                                       |     |
|--------------|-------------------------------------------------------------------------------------------------------|-----|
| 1424382_at   | 52377 reticulocalbin 3, EF-hand calcium binding domain                                                | 5.8 |
| 1453721_a_at | 20530 solute carrier family 31, member 2                                                              | 5.8 |
| 1422838_at   | 16532 potassium large conductance pH-sensitive channel, subfamily M, alpha member 3                   | 5.7 |
| 1425614_x_at | 14964 histocompatibility 2, D region locus 1                                                          | 5.7 |
| 1435976_at   |                                                                                                       | 5.7 |
| 1426990_at   | 65969 cubilin (intrinsic factor-cobalamin receptor)                                                   | 5.6 |
| 1427047_at   | 227699 nucleoporin 188                                                                                | 5.6 |
| 1429445_at   | 70894 RIKEN cDNA 4921510J17 gene                                                                      | 5.6 |
| 1417713_at   | 67204 eukaryotic translation initiation factor 2, subunit 2 (beta)                                    | 5.6 |
| 1422035_at   | 20707 serine (or cysteine) proteinase inhibitor, clade B, member 9c                                   | 5.5 |
| 1428492_at   | 384009 GLI pathogenesis-related 2                                                                     | 5.4 |
| 1417149_at   | 18452 procollagen-proline, 2-oxoglutarate 4-dioxygenase (proline 4-hydroxylase), alpha II polypeptide | 5.4 |
| 1419450_at   | 66612 ORM1-like 3 (S. cerevisiae)                                                                     | 5.3 |
| 1419399_at   | 17777 microsomal triglyceride transfer protein                                                        | 5.2 |
| 1421446_at   | 18752 protein kinase C, gamma                                                                         | 5.2 |
| 1427957_at   | 109254 RIKEN cDNA 9530008L14 gene                                                                     | 5.1 |
| 1440967_at   | 66898 BAI1-associated protein 2-like 1                                                                | 5.1 |
| 1457268_at   | 208266 DOT1-like, histone H3 methyltransferase (S. cerevisiae)                                        | 5.1 |
| 1426700_a_at | 103135 ubiquitin specific protease 52                                                                 | 5.1 |
| 1423389_at   | 17131 MAD homolog 7 (Drosophila)                                                                      | 5.0 |
| 1449133_at   | 20753 small proline-rich protein 1A                                                                   | 5.0 |
| 1434830_at   | 17119 Max dimerization protein                                                                        | 5.0 |
| 1443951_at   | 320496 RIKEN cDNA C230076A16 gene                                                                     | 5.0 |
| 1416480_a_at | 56295 hypoxia induced gene 1                                                                          | 5.0 |
| 1416401_at   | 12521 kangai 1 (suppression of tumorigenicity 6, prostate)                                            | 5.0 |
| 1451006_at   | 22436 xanthine dehydrogenase                                                                          | 5.0 |
| 1449891_a_at | 73379 discoidin, CUB and LCCL domain containing 2                                                     | 4.9 |
| 1418808_at   | 19682 retinol dehydrogenase 5                                                                         | 4.8 |
| 1427691_a_at | 15976 interferon (alpha and beta) receptor 2                                                          | 4.8 |
| 1435499_at   | 270035 RIKEN cDNA D030041N04 gene                                                                     | 4.8 |
| 1450922_a_at | 21808 transforming growth factor, beta 2                                                              | 4.7 |
| 1430762_at   | 235345 RIKEN cDNA 4833427G06 gene                                                                     | 4.7 |
| 1455394_at   |                                                                                                       | 4.7 |
| 1427079_at   | 100732 microtubule-associated protein, RP/EB family, member 3                                         | 4.7 |
| 1455765_a_at | 20927 ATP-binding cassette, sub-family C (CFTR/MRP), member 8                                         | 4.6 |
| 1418131_at   | 56045 SAM domain and HD domain, 1                                                                     | 4.6 |
| 1450100_a_at | 56070 transcription elongation regulator 1 (CA150)                                                    | 4.5 |
| 1422945_a_at | 16574 kinesin family member 5C                                                                        | 4.5 |
| 1440686_at   | 213171 protease, serine 27                                                                            | 4.5 |
| 1420772_a_at | 14605 TSC22 domain family 3                                                                           | 4.4 |
| 1454928_at   | 224903 scaffold attachment factor B                                                                   | 4.4 |
| 1417393_a_at | 67389 RIKEN cDNA 1110035L05 gene                                                                      | 4.4 |
| 1459920_at   | Transcribed locus                                                                                     | 4.4 |
| 1433523_at   | 231858 RIKEN cDNA D930005D10 gene                                                                     | 4.4 |
| 1436074_at   | 243910 cDNA sequence AY078069                                                                         | 4.4 |
| 1416600_a_at | 54720 Down syndrome critical region homolog 1 (human)                                                 | 4.4 |
| 1425019_at   | 217379 UBX domain containing 4                                                                        | 4.4 |
| 1425047_a_at | 70873 RIKEN cDNA 4921517L17 gene                                                                      | 4.3 |
| 1453345_at   | 70701 RIKEN cDNA 3830408G10 gene                                                                      | 4.3 |
| 1423944_at   | 15458 hemopexin                                                                                       | 4.3 |
| 1418777_at   | 20300 chemokine (C-C motif) ligand 25                                                                 | 4.3 |
| 1421365_at   | 14313 follistatin                                                                                     | 4.2 |
| 1447802_x_at |                                                                                                       | 4.2 |
| 1459681_at   | Transcribed locus                                                                                     | 4.2 |
| 1448562_at   | 22271 uridine phosphorylase 1                                                                         | 4.1 |
| 1428468_at   | 73205 RIKEN cDNA 3110043O21 gene                                                                      | 4.1 |
| 1417707_at   | 100637 RIKEN cDNA B230342M21 gene                                                                     | 4.1 |
| 1426519_at   | 18451 procollagen-proline, 2-oxoglutarate 4-dioxygenase (proline 4-hydroxylase), alpha 1 polypeptide  | 4.0 |
| 1424148_a_at | 106766 expressed sequence AW049765                                                                    | 4.0 |
| 1418863_at   | 14463 GATA binding protein 4                                                                          | 4.0 |
| 1427736_a_at | 54199 chemokine (C-C motif) receptor-like 2                                                           | 3.9 |
| 1427385_s_at | 109711 actinin, alpha 1                                                                               | 3.9 |
| 1416831_at   | 18010 neuraminidase 1                                                                                 | 3.9 |
| 1449946_a_at | 68040 RIKEN cDNA 3110024A21 gene                                                                      | 3.8 |
| 1426681_at   | 217331 zinc finger CCCH type containing 5                                                             | 3.8 |
| 1460562_at   | 101592 elongation factor Tu GTP binding domain containing 1                                           | 3.8 |
| 1418102_at   | 15205 hairy and enhancer of split 1 (Drosophila)                                                      | 3.8 |
| 1425507_at   | 76688 ADP-ribosylation factor related protein 1                                                       | 3.8 |
| 1431646_a_at | 58244 syntaxin 6                                                                                      | 3.8 |

|              |                                                                                          |     |
|--------------|------------------------------------------------------------------------------------------|-----|
| 1451385_at   | 70186 RIKEN cDNA 2310056P07 gene                                                         | 3.7 |
| 1422803_at   | 83554 follistatin-like 3                                                                 | 3.7 |
| 1425336_x_at | 14972 histocompatibility 2, K1, K region                                                 | 3.7 |
| 1448806_at   |                                                                                          | 3.7 |
| 1439488_at   | Transcribed locus                                                                        | 3.7 |
| 1421712_at   | 20339 selectin, endothelial cell                                                         | 3.7 |
| 1422027_a_at | 23871 E26 avian leukemia oncogene 1, 5' domain                                           | 3.7 |
| 1431082_a_at | 67657 RAB, member of RAS oncogene family-like 3                                          | 3.7 |
| 1455187_at   | 230848 zinc finger and BTB domain containing 40                                          | 3.6 |
| 1424817_at   | 70997 sperm flagellar 1                                                                  | 3.6 |
| 1415798_at   | 12305 discoidin domain receptor family, member 1                                         | 3.6 |
| 1450838_x_at | 383438 /// ribosomal protein L37 /// similar to ribosomal protein L37<br>67281           | 3.6 |
| 1455491_at   | 432467 similar to heterogeneous nuclear ribonucleoprotein H3 isoform a                   | 3.6 |
| 1435458_at   |                                                                                          | 3.6 |
| 1459343_at   | 217026 RIKEN cDNA 2700008B19 gene                                                        | 3.6 |
| 1419761_a_at | 14391 GA repeat binding protein, beta 1                                                  | 3.6 |
| 1422218_at   | 18439 purinergic receptor P2X, ligand-gated ion channel, 7                               | 3.5 |
| 1424731_at   | 217011 notchless homolog 1 (Drosophila)                                                  | 3.5 |
| 1428682_at   | 78751 zinc finger CCCH type containing 6                                                 | 3.5 |
| 1418861_at   | 59004 protein inhibitor of activated STAT, 4                                             | 3.5 |
| 1448050_s_at | 26921 mitogen-activated protein kinase kinase kinase kinase 4                            | 3.5 |
| 1439073_at   | 224585 Zinc finger protein 160                                                           | 3.5 |
| 1441081_a_at | 68763 RIKEN cDNA 1110038B12 gene                                                         | 3.5 |
| 1419132_at   | 24088 toll-like receptor 2                                                               | 3.5 |
| 1422473_at   | 18578 phosphodiesterase 4B, cAMP specific                                                | 3.5 |
| 1452521_a_at | 18793 urokinase plasminogen activator receptor                                           | 3.5 |
| 1431284_a_at | 73658 RIKEN cDNA 2210013K02 gene                                                         | 3.5 |
| 1425296_a_at | 50780 regulator of G-protein signaling 3                                                 | 3.4 |
| 1421679_a_at | 12575 cyclin-dependent kinase inhibitor 1A (P21)                                         | 3.4 |
| 1422966_a_at | 22042 transferrin receptor                                                               | 3.4 |
| 1415814_at   | 11966 ATPase, H+ transporting, V1 subunit B, isoform 2                                   | 3.4 |
| 1423117_at   | 80912 pumilio 1 (Drosophila)                                                             | 3.4 |
| 1429052_at   | 19266 protein tyrosine phosphatase, receptor type, D                                     | 3.3 |
| 1437969_s_at | 68327 RIKEN cDNA 0610007P22 gene                                                         | 3.3 |
| 1447661_at   | Transcribed locus                                                                        | 3.3 |
| 1422599_s_at | 20841 zinc finger protein 143                                                            | 3.3 |
| 1423686_a_at | 66151 RIKEN cDNA 1110020C13 gene                                                         | 3.3 |
| 1424818_at   | 223774 asparagine-linked glycosylation 12 homolog (yeast, alpha-1,6-mannosyltransferase) | 3.3 |
| 1417225_at   | 65106 ADP-ribosylation factor-like 6 interacting protein 5                               | 3.3 |
| 1435872_at   |                                                                                          | 3.2 |
| 1416290_a_at | 23996 proteasome (prosome, macropain) 26S subunit, ATPase, 4                             | 3.2 |
| 1435852_at   | 101809 sprouty-related, EVH1 domain containing 3                                         | 3.2 |
| 1439538_at   | 67433 RIKEN cDNA 0610011N22 gene                                                         | 3.2 |
| 1428572_at   | 70350 brain abundant, membrane attached signal protein 1                                 | 3.2 |
| 1451485_at   | 67684 RIKEN cDNA 3300001P08 gene                                                         | 3.2 |
| 1449338_at   | 52717 DNA segment, Chr 10, ERATO Doi 641, expressed                                      | 3.2 |
| 1446131_at   |                                                                                          | 3.2 |
| 1417389_at   | 14733 glypican 1                                                                         | 3.2 |
| 1417500_a_at | 21817 transglutaminase 2, C polypeptide                                                  | 3.2 |
| 1430776_s_at | 70615 ankyrin repeat domain 24                                                           | 3.2 |
| 1450113_at   |                                                                                          | 3.2 |
| 1450534_x_at | 56628 MHC (A.CA/J(H-2K-f) class I antigen                                                | 3.2 |
| 1429070_at   | 71254 RIKEN cDNA 4933440H19 gene                                                         | 3.2 |
| 1436524_at   | 107243 RIKEN cDNA 4833438C02 gene                                                        | 3.2 |
| 1434364_at   | 53859 mitogen-activated protein kinase kinase kinase 14                                  | 3.2 |
| 1416487_a_at | 22601 yes-associated protein 1                                                           | 3.2 |
| 1430987_s_at | 60321 WW domain binding protein 11                                                       | 3.2 |
| 1423446_at   | 13144 death-associated kinase 3                                                          | 3.1 |
| 1423549_at   | 55963 solute carrier family 1 (glutamate/neutral amino acid transporter), member 4       | 3.1 |
| 1435394_s_at | 11853 ras homolog gene family, member C                                                  | 3.1 |
| 1417329_at   | 54338 solute carrier family 23 (nucleobase transporters), member 2                       | 3.1 |
| 1423432_at   | 83946 pleckstrin homology domain interacting protein                                     | 3.1 |
| 1455096_at   |                                                                                          | 3.1 |
| 1417034_at   | 67091 trafficking protein particle complex 6A                                            | 3.1 |
| 1423085_at   | 13643 ephrin B3                                                                          | 3.1 |
| 1418240_at   | 14469 guanylate nucleotide binding protein 2                                             | 3.1 |
| 1458718_at   | 243025 Gene model 446, (NCBI)                                                            | 3.1 |
| 1452178_at   | 18810 plectin 1                                                                          | 3.1 |
| 1423970_at   | 73666 THO complex 3                                                                      | 3.1 |

|              |                                                                                       |     |
|--------------|---------------------------------------------------------------------------------------|-----|
| 1451123_at   | 212706 RIKEN cDNA C330016O10 gene                                                     | 3.1 |
| 1443072_at   | 171395 Polycystic kidney disease 1 like 1                                             | 3.1 |
| 1424380_at   | 330192 cDNA sequence BC026744                                                         | 3.0 |
| 1418453_a_at | 11931 ATPase, Na+/K+ transporting, beta 1 polypeptide                                 | 3.0 |
| 1416994_at   | 66827 tetratricopeptide repeat domain 1                                               | 3.0 |
| 1421499_a_at | 19250 protein tyrosine phosphatase, non-receptor type 14                              | 3.0 |
| 1431561_a_at | 71723 DEAH (Asp-Glu-Ala-His) box polypeptide 34                                       | 3.0 |
| 1427955_a_at | 26901 differentially expressed in B16F10 1                                            | 3.0 |
| 1428226_at   | 68966 RIKEN cDNA 1500001L15 gene                                                      | 3.0 |
| 1416409_at   | 11430 acyl-Coenzyme A oxidase 1, palmitoyl                                            | 3.0 |
| 1424150_at   | 233552 glycerophosphodiester phosphodiesterase domain containing 5                    | 3.0 |
| 1429463_at   | 108079 protein kinase, AMP-activated, alpha 2 catalytic subunit                       | 3.0 |
| 1420975_at   | 22385 bromodomain adjacent to zinc finger domain, 1B                                  | 2.9 |
| 1449800_x_at | 71838 PHD finger protein 7                                                            | 2.9 |
| 1448417_at   | 18081 ninjurin 1                                                                      | 2.9 |
| 1439780_at   | 66229 ribosomal protein L7-like 1                                                     | 2.9 |
| 1416991_at   | 68291 mitochondrial translation optimization 1 homolog (S. cerevisiae)                | 2.9 |
| 1442918_at   | 260315 neuron navigator 3                                                             | 2.9 |
| 1456284_at   | PREDICTED: Mus musculus similar to PRP2 (LOC380863), mRNA                             | 2.9 |
| 1448049_at   | 108829 Jumonji domain containing 1C                                                   | 2.9 |
| 1420649_at   | 11906 AT motif binding factor 1                                                       | 2.9 |
| 1418174_at   | 13170 D site albumin promoter binding protein                                         | 2.8 |
| 1419087_s_at | 67465 splicing factor 3a, subunit 1                                                   | 2.8 |
| 1416615_at   | 53895 caseinolytic protease, ATP-dependent, proteolytic subunit homolog (E. coli)     | 2.8 |
| 1434726_at   | 106757 RIKEN cDNA 4933402B14 gene                                                     | 2.8 |
| 1431885_a_at | 71711 MUS81 endonuclease homolog (yeast)                                              | 2.8 |
| 1435280_at   | 105178 expressed sequence AI452195                                                    | 2.8 |
| 1425810_a_at | 13007 cysteine and glycine-rich protein 1                                             | 2.8 |
| 1427672_a_at | 22289 ubiquitously transcribed tetratricopeptide repeat gene, X chromosome            | 2.8 |
| 1416186_at   | 52830 proline-rich nuclear receptor coactivator 2                                     | 2.8 |
| 1428557_a_at | 72085 O-sialoglycoprotein endopeptidase-like 1                                        | 2.8 |
| 1427009_at   | 16776 laminin, alpha 5                                                                | 2.8 |
| 1426898_at   | 66513 mitogen-activated protein kinase kinase kinase 7 interacting protein 1          | 2.7 |
| 1436559_a_at | 53380 proteasome (prosome, macropain) 26S subunit, non-ATPase, 10                     | 2.7 |
| 1435526_at   | 240832 torsin A interacting protein 2                                                 | 2.7 |
| 1454771_at   |                                                                                       | 2.7 |
| 1419575_s_at | 30046 zinc finger protein 292                                                         | 2.7 |
| 1426721_s_at | 99929 TCDD-inducible poly(ADP-ribose) polymerase                                      | 2.7 |
| 1450798_at   | 81877 tenascin XB                                                                     | 2.7 |
| 1456879_at   | 232236 RIKEN cDNA C130022K22 gene                                                     | 2.7 |
| 1416304_at   | 56722 LPS-induced TN factor                                                           | 2.7 |
| 1425319_s_at | 67797 RIKEN cDNA 6530403A03 gene                                                      | 2.7 |
| 1451095_at   | 27053 asparagine synthetase                                                           | 2.6 |
| 1448271_a_at | 56200 DEAD (Asp-Glu-Ala-Asp) box polypeptide 21                                       | 2.6 |
| 1417240_at   | 22793 zyxin                                                                           | 2.6 |
| 1428675_at   | 66193 RIKEN cDNA 1110049F12 gene                                                      | 2.6 |
| 1419046_at   | 59053 brain protein 16                                                                | 2.6 |
| 1438062_at   | 320612 RIKEN cDNA 4832420A03 gene                                                     | 2.6 |
| 1449832_at   | 73553 RIKEN cDNA 1700091H14 gene                                                      | 2.6 |
| 1454045_a_at | 260345 /// RIKEN cDNA 4933424M23 gene /// silencer-associated factor (Saf) pseudogene | 2.6 |
|              | 74451                                                                                 |     |
| 1423122_at   | 69534 arginine vasopressin-induced 1                                                  | 2.6 |
| 1416038_at   | 56463 expressed sequence AL033314                                                     | 2.6 |
| 1433980_at   | 81601 HIV-1 tat interactive protein, homolog (human)                                  | 2.6 |
| 1423708_a_at | 23874 phenylalanine-tRNA synthetase-like, beta subunit                                | 2.6 |
| 1426653_at   | 17215 minichromosome maintenance deficient 3 (S. cerevisiae)                          | 2.6 |
| 1424250_a_at | 71704 Rho guanine nucleotide exchange factor (GEF) 3                                  | 2.5 |
| 1421378_s_at | 17250 ATP-binding cassette, sub-family C (CFTR/MRP), member 1                         | 2.5 |
| 1424309_a_at | 17434 molybdenum cofactor synthesis 2                                                 | 2.5 |
| 1417392_a_at | 20540 solute carrier family 7 (cationic amino acid transporter, y+ system), member 7  | 2.5 |
| 1439371_x_at | 21856 translocator of inner mitochondrial membrane 44                                 | 2.5 |
| 1428143_a_at | 66853 patatin-like phospholipase domain containing 2                                  | 2.5 |
| 1434873_a_at | 216859 centaurin, beta 1                                                              | 2.5 |
| 1415807_s_at | 20382 splicing factor, arginine/serine-rich 2 (SC-35)                                 | 2.5 |
| 1416104_at   | 24070 mannose-P-dolichol utilization defect 1                                         | 2.5 |
| 1423991_at   | 75416 RIKEN cDNA 2610033H07 gene                                                      | 2.5 |
| 1434100_x_at | Transcribed locus                                                                     | 2.5 |
| 1433609_s_at | 20931 surfeit gene 2                                                                  | 2.5 |
| 1419554_at   | 16423 CD47 antigen (Rh-related antigen, integrin-associated signal transducer)        | 2.4 |
| 1426474_at   | 246782 ATP synthase mitochondrial F1 complex assembly factor 2                        | 2.4 |

|              |                                                                                         |     |
|--------------|-----------------------------------------------------------------------------------------|-----|
| 1435188_at   | 433627 similar to chromosome 1 open reading frame 51                                    | 2.4 |
| 1440299_at   | 214763 RIKEN cDNA E330016A19 gene                                                       | 2.4 |
| 1421151_a_at | 13836 Eph receptor A2                                                                   | 2.4 |
| 1455887_at   | 381903 asparagine-linked glycosylation 8 homolog (yeast, alpha-1,3-glycosyltransferase) | 2.4 |
| 1416148_at   | 114128 lysosomal-associated protein transmembrane 4B                                    | 2.3 |
| 1422557_s_at | 17748 metallothionein 1                                                                 | 2.3 |
| 1423393_at   | 29876 chloride intracellular channel 4 (mitochondrial)                                  | 2.3 |
| 1428919_at   | 75296 Fgfr1 oncogene partner                                                            | 2.3 |
| 1415971_at   | 17118 myristoylated alanine rich protein kinase C substrate                             | 2.3 |
| 1434931_at   | 18007 neogenin                                                                          | 2.3 |
| 1452207_at   |                                                                                         | 2.3 |
| 1419569_a_at | 57444 interferon-stimulated protein                                                     | 2.2 |
| 1428138_s_at | 67166 ADP-ribosylation factor-like 10C                                                  | 2.2 |

#### Downregulated transcripts

| Affymetrix probe set ID | Gene ID | Gene description                                                              | Fold change compared to uninfected mGEPs |
|-------------------------|---------|-------------------------------------------------------------------------------|------------------------------------------|
| 1428083_at              | 66961   | RIKEN cDNA 2310043N10 gene                                                    | -11.5                                    |
| 1436761_s_at            | 71721   | RIKEN cDNA 1200015N20 gene                                                    | -10.9                                    |
| 1423894_a_at            | 67789   | DALR anticodon binding domain containing 3                                    | -8.2                                     |
| 1455878_at              | 70036   | RIKEN cDNA 2700023E23 gene                                                    | -7.9                                     |
| 1429739_a_at            | 56218   | zinc finger protein 278                                                       | -7.4                                     |
| 1419115_at              | 66789   | RIKEN cDNA 5430428G01 gene                                                    | -7.3                                     |
| 1433683_at              | 77411   | RIKEN cDNA 9530027K23 gene                                                    | -7.3                                     |
| 1424515_at              | 320063  | RIKEN cDNA B230354K17 gene                                                    | -7.2                                     |
| 1428447_at              | 75712   | transmembrane protein 14A                                                     | -7.2                                     |
| 1418595_at              | 57435   | plasma membrane associated protein, S3-12                                     | -7.1                                     |
| 1423667_at              | 232087  | methionine adenosyltransferase II, alpha                                      | -7.0                                     |
| 1433672_at              | 215201  | RIKEN cDNA 4732479N06 gene                                                    | -6.2                                     |
| 1426350_at              | 217664  | mannoside acetylglucosaminyltransferase 2                                     | -6.1                                     |
| 1418209_a_at            | 18645   | profilin 2                                                                    | -6.0                                     |
| 1423672_at              | 72421   | RIKEN cDNA 2510042P03 gene                                                    | -6.0                                     |
| 1415913_at              | 68052   | ribosomal protein S13                                                         | -5.8                                     |
| 1418890_a_at            | 19340   | RAB3D, member RAS oncogene family                                             | -5.7                                     |
| 1435612_at              | 330908  | opioid binding protein/cell adhesion molecule-like                            | -5.7                                     |
| 1419456_at              | 67880   | dicarbonyl L-xylulose reductase                                               | -5.6                                     |
| 1434481_at              | 74026   | RIKEN cDNA 4121402D02 gene                                                    | -5.6                                     |
| 1420647_a_at            | 16691   | /// keratin complex 2, basic, gene 8 /// similar to cytokeratin EndoA - mouse | -5.4                                     |
|                         | 434261  |                                                                               |                                          |
| 1429896_at              | 74756   | RIKEN cDNA 5830408B19 gene                                                    | -5.4                                     |
| 1438201_at              |         | Transcribed locus                                                             | -5.4                                     |
| 1454060_a_at            | 18176   | neuroblastoma ras oncogene                                                    | -5.4                                     |
| 1423067_at              | 80280   | CDK5 regulatory subunit associated protein 3                                  | -5.2                                     |
| 1430978_at              | 75617   | ribosomal protein S25                                                         | -5.2                                     |
| 1424544_at              | 223649  | nuclear receptor binding protein 2                                            | -5.2                                     |
| 1416499_a_at            | 22428   | dynactin 6                                                                    | -5.0                                     |
| 1426558_x_at            | 66376   | RIKEN cDNA 3100002L24 gene                                                    | -5.0                                     |
| 1427020_at              | 219151  | scavenger receptor class A, member 3                                          | -5.0                                     |
| 1450686_at              | 320276  | /// RIKEN cDNA A130027P21 gene /// paraoxonase 2                              | -4.9                                     |
|                         | 330260  |                                                                               |                                          |
| 1427898_at              | 74132   | ring finger protein (C3H2C3 type) 6                                           | -4.8                                     |
| 1417214_at              | 80718   | RAB27b, member RAS oncogene family                                            | -4.8                                     |
| 1436959_x_at            | 56876   | nasal embryonic LHRH factor                                                   | -4.8                                     |
| 1428113_at              | 70551   | RIKEN cDNA 4930403J22 gene                                                    | -4.7                                     |
| 1428428_at              | 68758   | Williams Beuren syndrome chromosome region 21                                 | -4.7                                     |
| 1449303_at              | 75747   | sestrin 3                                                                     | -4.7                                     |
| 1416838_at              | 17850   | methylmalonyl-Coenzyme A mutase                                               | -4.6                                     |
| 1434013_at              | 319713  | actin binding LIM protein family, member 3                                    | -4.6                                     |
| 1428512_at              | 70237   | basic helix-loop-helix domain containing, class B9                            | -4.6                                     |
| 1425546_a_at            | 22041   | transferrin                                                                   | -4.5                                     |
| 1437471_at              | 217366  | leucine rich repeat containing 45                                             | -4.5                                     |
| 1428078_at              | 76892   | RIKEN cDNA 0610013E23 gene                                                    | -4.5                                     |
| 1455195_at              | 20088   | ribosomal protein S24                                                         | -4.5                                     |
| 1434613_at              | 69053   | RIKEN cDNA 1810013L24 gene                                                    | -4.5                                     |
| 1438730_at              | 408054  | cDNA sequence BC028801                                                        | -4.5                                     |
| 1418382_at              | 494504  | adenomatosis polyposis coli down-regulated 1                                  | -4.4                                     |
| 1436756_x_at            | 15107   | L-3-hydroxyacyl-Coenzyme A dehydrogenase, short chain                         | -4.3                                     |
| 1428256_at              | 69672   | RIKEN cDNA 2310047H23 gene                                                    | -4.3                                     |
| 1418501_a_at            | 170719  | oxidation resistance 1                                                        | -4.3                                     |

|              |                                                                                                         |      |
|--------------|---------------------------------------------------------------------------------------------------------|------|
| 1438542_at   |                                                                                                         | -4.3 |
| 1452213_at   | 21763 testis expressed gene 2                                                                           | -4.3 |
| 1419821_s_at | 15926 isocitrate dehydrogenase 1 (NADP+), soluble                                                       | -4.3 |
| 1431183_at   | 73467 RIKEN cDNA 1700066M21 gene                                                                        | -4.3 |
| 1433779_at   | 319996 cancer susceptibility candidate 4                                                                | -4.3 |
| 1424828_a_at | 14194 fumarate hydratase 1                                                                              | -4.3 |
| 1433536_at   | 237253 low density lipoprotein receptor-related protein 11                                              | -4.2 |
| 1427129_a_at | 74326 heterogeneous nuclear ribonucleoprotein R                                                         | -4.1 |
| 1434987_at   | 11669 aldehyde dehydrogenase 2, mitochondrial                                                           | -4.1 |
| 1448559_at   | 14251 flotillin 1                                                                                       | -4.1 |
| 1417185_at   | 110454 lymphocyte antigen 6 complex, locus A                                                            | -4.1 |
| 1421340_at   | 26408 mitogen activated protein kinase kinase 5                                                         | -4.1 |
| 1443099_at   | 432940 Similar to LOC90268 protein                                                                      | -4.1 |
| 1416817_at   | 59125 NIMA (never in mitosis gene a)-related expressed kinase 7                                         | -4.0 |
| 1416166_a_at | 53381 peroxiredoxin 4                                                                                   | -4.0 |
| 1452968_at   | 68588 collagen triple helix repeat containing 1                                                         | -4.0 |
| 1427027_a_at | 66596 general transcription factor III A                                                                | -4.0 |
| 1416375_at   | 544716 /// adaptor-related protein complex 3, mu 1 subunit /// similar to clathrin adaptor protein mu3A | -3.9 |
|              | 55946                                                                                                   |      |
| 1422752_at   | 67005 polymerase (RNA) III (DNA directed) polypeptide K                                                 | -3.9 |
| 1452098_at   | 214901 CTF18, chromosome transmission fidelity factor 18 homolog (S. cerevisiae)                        | -3.9 |
| 1415733_a_at | 68512 RIKEN cDNA 1110019J04 gene                                                                        | -3.9 |
| 1420641_a_at | 59010 sulfide quinone reductase-like (yeast)                                                            | -3.9 |
| 1433655_at   |                                                                                                         | -3.9 |
| 1451573_a_at | 20909 syntaxin 4A (placental)                                                                           | -3.8 |
| 1440559_at   | 15365 high mobility group AT-hook 2, pseudogene 1                                                       | -3.8 |
| 1452374_at   | 218100 zinc finger protein 322a                                                                         | -3.8 |
| 1423364_a_at | 14339 fused toes                                                                                        | -3.8 |
| 1424696_at   | 67549 G protein-coupled receptor 89                                                                     | -3.8 |
| 1435413_x_at | 545536 /// RIKEN cDNA 2700060E02 gene /// similar to RIKEN cDNA 2700060E02                              | -3.8 |
|              | 68045                                                                                                   |      |
| 1433626_at   | 235527 phospholipid scramblase 4                                                                        | -3.8 |
| 1450886_at   | 14841 germ cell-specific gene 2                                                                         | -3.8 |
| 1432494_a_at | 76411 RIKEN cDNA 1700019E19 gene                                                                        | -3.8 |
| 1428411_at   | 66602 RIKEN cDNA 1700020I14 gene                                                                        | -3.7 |
| 1416158_at   | 11819 nuclear receptor subfamily 2, group F, member 2                                                   | -3.7 |
| 1447483_s_at | 72091 RIKEN cDNA 2610002F03 gene                                                                        | -3.7 |
| 1448238_at   | 68045 RIKEN cDNA 2700060E02 gene                                                                        | -3.7 |
| 1423121_at   | 15925 insulin degrading enzyme                                                                          | -3.7 |
| 1435464_at   | 68552 RIKEN cDNA 1110003E01 gene                                                                        | -3.7 |
| 1436121_a_at | 67711 non-SMC element 1 homolog (S. cerevisiae)                                                         | -3.6 |
| 1424438_a_at | 230514 leptin receptor overlapping transcript                                                           | -3.6 |
| 1460603_at   | 209086 sterile alpha motif domain containing 9-like                                                     | -3.6 |
| 1417913_at   | 109145 RIKEN cDNA 2810037C03 gene                                                                       | -3.6 |
| 1424786_s_at | 54636 WD repeat domain 45                                                                               | -3.5 |
| 1437829_s_at | 13631 eukaryotic elongation factor-2 kinase                                                             | -3.5 |
| 1426269_at   | 20955 synaptobrevin like 1                                                                              | -3.5 |
| 1435617_at   | 106606 expressed sequence AI480743                                                                      | -3.5 |
| 1434312_at   | 104877 expressed sequence AI788669                                                                      | -3.5 |
| 1434549_at   | 53869 RAB11a, member RAS oncogene family                                                                | -3.5 |
| 1423370_a_at | 103236 casein kinase 1, gamma 2                                                                         | -3.5 |
| 1423864_at   | 192292 nuclear receptor binding protein                                                                 | -3.5 |
| 1417985_at   | 67122 Notch-regulated ankyrin repeat protein                                                            | -3.4 |
| 1424106_at   | 104771 RIKEN cDNA 1200003C05 gene                                                                       | -3.4 |
| 1421819_a_at | 56086 SET translocation                                                                                 | -3.4 |
| 1423591_at   | 67529 FGFR1 oncogene partner 2                                                                          | -3.4 |
| 1416759_at   | 171580 microtubule associated monooxygenase, calponin and LIM domain containing 1                       | -3.4 |
| 1416372_at   | 19210 phosphatidylserine synthase 1                                                                     | -3.4 |
| 1421935_at   | 67427 ribosomal protein S20                                                                             | -3.3 |
| 1423151_at   | 67838 DnaJ (Hsp40) homolog, subfamily B, member 11                                                      | -3.3 |
| 1438429_at   | 72505 RIKEN cDNA 2610319H10 gene                                                                        | -3.3 |
| 1428718_at   | 69938 secernin 1                                                                                        | -3.3 |
| 1434554_at   | 68729 tripartite motif protein 37                                                                       | -3.3 |
| 1457588_at   | 97124 expressed sequence C76213                                                                         | -3.3 |
| 1429063_s_at | 16558 kinesin family member 16B                                                                         | -3.3 |
| 1442540_at   | 96961 expressed sequence C77609                                                                         | -3.3 |
| 1448919_at   | 66205 CD302 antigen                                                                                     | -3.3 |
| 1429189_at   | 71784 RIKEN cDNA 1110007C02 gene                                                                        | -3.3 |
| 1449348_at   | 56524 membrane protein, palmitoylated 6 (MAGUK p55 subfamily member 6)                                  | -3.3 |
| 1423334_at   | 67458 RIKEN cDNA 1200007D18 gene                                                                        | -3.3 |
| 1423218_a_at | 18120 mitochondrial ribosomal protein L49                                                               | -3.3 |

|              |                                                                                              |      |
|--------------|----------------------------------------------------------------------------------------------|------|
| 1428351_at   | 67905 protein phosphatase 1M                                                                 | -3.3 |
| 1448705_at   | 81630 zinc finger protein 297                                                                | -3.3 |
| 1421871_at   | 56726 SH3-binding domain glutamic acid-rich protein like                                     | -3.3 |
| 1426880_at   | 208618 cDNA sequence BC026657                                                                | -3.3 |
| 1415855_at   | 17311 kit ligand                                                                             | -3.2 |
| 1424813_at   | 105428 /// expressed sequence AA536717 /// hypothetical protein LOC218805                    | -3.2 |
|              | 218805                                                                                       |      |
| 1419360_a_at | 268996 synovial sarcoma translocation, Chromosome 18                                         | -3.2 |
| 1455058_at   | 210376 myotubularin related protein 9                                                        | -3.2 |
| 1428636_at   | 74051 six transmembrane epithelial antigen of prostate 2                                     | -3.2 |
| 1427346_at   | 18422 /// ovary testis transcribed /// similar to Ott protein                                | -3.2 |
|              | 382243                                                                                       |      |
| 1435802_at   | 232879 gene model 157, (NCBI)                                                                | -3.2 |
| 1428694_at   | 75957 RIKEN cDNA 5033413D16 gene                                                             | -3.2 |
| 1415727_at   | 246703 apolipoprotein A-I binding protein                                                    | -3.2 |
| 1423319_at   | 15242 hematopoietically expressed homeobox                                                   | -3.2 |
| 1426246_at   | 19128 protein S (alpha)                                                                      | -3.2 |
| 1426387_x_at | 236604 /// RIKEN cDNA 4933439C20 gene /// phosphatidylserine decarboxylase                   | -3.2 |
|              | 320951                                                                                       |      |
| 1423767_at   | 66310 RIKEN cDNA 2810410M20 gene                                                             | -3.2 |
| 1426253_at   | 66768 RIKEN cDNA 4933428G09 gene                                                             | -3.2 |
| 1426628_at   | 234463 transmembrane protein 34                                                              | -3.2 |
| 1429458_at   | 67383 RIKEN cDNA 2410127L17 gene                                                             | -3.2 |
| 1420696_at   | 20348 sema domain, immunoglobulin domain (Ig), short basic domain, secreted, (semaphorin) 3C | -3.2 |
| 1427074_at   | 245867 RIKEN cDNA 5330414D10 gene                                                            | -3.2 |
| 1452654_at   | 70546 zinc finger, DHHC domain containing 2                                                  | -3.2 |
| 1426571_at   | 101772 transmembrane protein 16A                                                             | -3.1 |
| 1451277_at   | 225791 zinc binding alcohol dehydrogenase, domain containing 2                               | -3.1 |
| 1417090_at   | 19672 reticulocalbin 1                                                                       | -3.1 |
| 1418839_at   | 170823 glomulin, FKBP associated protein                                                     | -3.1 |
| 1421534_at   |                                                                                              | -3.1 |
| 1424707_at   | 68581 RIKEN cDNA 1110014C03 gene                                                             | -3.1 |
| 1417027_at   | 80890 tripartite motif protein 2                                                             | -3.1 |
| 1424782_at   | 67171 RIKEN cDNA 2610318G18 gene                                                             | -3.1 |
| 1433954_at   | 74038 RIKEN cDNA 4632419I22 gene                                                             | -3.1 |
| 1432264_x_at | 20463 cytochrome c oxidase subunit VIIa polypeptide 2-like                                   | -3.1 |
| 1416803_at   | 14231 FK506 binding protein 7                                                                | -3.1 |
| 1426098_a_at | 12380 calpastatin                                                                            | -3.1 |
| 1428573_at   | 69993 chimerin (chimaerin) 2                                                                 | -3.1 |
| 1438948_x_at | 12257 benzodiazepine receptor, peripheral                                                    | -3.1 |
| 1459274_at   | Transcribed locus                                                                            | -3.1 |
| 1416412_at   | 18201 neutral sphingomyelinase (N-SMase) activation associated factor                        | -3.1 |
| 1422271_at   | 19065 pancreatic polypeptide receptor 1                                                      | -3.1 |
| 1430053_a_at | 67059 RIKEN cDNA 2810409H07 gene                                                             | -3.1 |
| 1434696_at   | 245866 cDNA sequence BC037708                                                                | -3.0 |
| 1437403_at   | 320825 RIKEN cDNA E130306M17 gene                                                            | -3.0 |
| 1422516_a_at | 58249 fibroblast growth factor (acidic) intracellular binding protein                        | -3.0 |
| 1428604_at   | 112422 RIKEN cDNA 2610305D13 gene                                                            | -3.0 |
| 1419552_at   | 52665 enoyl Coenzyme A hydratase domain containing 1                                         | -3.0 |
| 1423804_a_at | 319554 isopentenyl-diphosphate delta isomerase                                               | -3.0 |
| 1428407_at   | 544935 /// heterogeneous nuclear ribonucleoprotein A0 /// similar to heterogeneous nuclear   | -3.0 |
|              | 77134 ribonucleoprotein A0                                                                   |      |
| 1433819_s_at | 28169 1-acylglycerol-3-phosphate O-acyltransferase 3                                         | -3.0 |
| 1418672_at   | 27384 aldo-keto reductase family 1, member C13                                               | -3.0 |
| 1423300_at   | 66980 zinc finger, DHHC domain containing 6                                                  | -3.0 |
| 1419164_at   | 26466 zinc finger protein 260                                                                | -3.0 |
| 1415756_a_at | 20615 SNAP-associated protein                                                                | -3.0 |
| 1416101_a_at | 50708 histone 1, H1c                                                                         | -3.0 |
| 1424198_at   | 71228 discs, large homolog 5 (Drosophila)                                                    | -3.0 |
| 1419635_at   | 67392 RIKEN cDNA 4833420G17 gene                                                             | -3.0 |
| 1430012_at   | 68790 RIKEN cDNA 1110050K14 gene                                                             | -2.9 |
| 1436448_a_at | 19224 prostaglandin-endoperoxide synthase 1                                                  | -2.9 |
| 1438610_a_at | 12972 Crystallin, zeta                                                                       | -2.9 |
| 1448286_at   | 15108 hydroxyacyl-Coenzyme A dehydrogenase type II                                           | -2.9 |
| 1460676_at   | 74158 RIKEN cDNA 1300006C06 gene                                                             | -2.9 |
| 1417272_at   | 68303 RIKEN cDNA 9130005N14 gene                                                             | -2.9 |
| 1425323_a_at | 214917 cDNA sequence BC008155                                                                | -2.9 |
| 1434705_at   | 13017 C-terminal binding protein 2                                                           | -2.9 |
| 1435870_at   | 20962 Synaptonemal complex protein 3                                                         | -2.9 |
| 1417203_at   | 66071 ethylmalonic encephalopathy 1                                                          | -2.9 |

|              |                                                                                                                                        |      |
|--------------|----------------------------------------------------------------------------------------------------------------------------------------|------|
| 1418327_at   | 68002 RIKEN cDNA 1110058L19 gene                                                                                                       | -2.9 |
| 1426160_a_at | 20872 serine/threonine kinase 16                                                                                                       | -2.9 |
| 1417373_a_at | 22145 tubulin, alpha 4                                                                                                                 | -2.9 |
| 1424160_at   | 66248 asparagine-linked glycosylation 5 homolog (yeast, dolichyl-phosphate beta-glucosyltransferase)                                   | -2.9 |
| 1455288_at   | 66180 RIKEN cDNA 1110036O03 gene                                                                                                       | -2.9 |
| 1424884_at   | 30050 F-box and WD-40 domain protein 2                                                                                                 | -2.9 |
| 1420873_at   | 19230 protein tyrosine kinase 9                                                                                                        | -2.8 |
| 1450105_at   |                                                                                                                                        | -2.8 |
| 1436518_at   | 69727 ubiquitin specific protease 46                                                                                                   | -2.8 |
| 1422000_at   | 27383 aldo-keto reductase family 1, member C12                                                                                         | -2.8 |
| 1416882_at   | 67865 regulator of G-protein signalling 10                                                                                             | -2.8 |
| 1451726_at   | 219135 myotubularin related protein 6                                                                                                  | -2.8 |
| 1415719_s_at | 74252 armadillo repeat containing 1                                                                                                    | -2.8 |
| 1450355_a_at | 12332 capping protein (actin filament), gelsolin-like                                                                                  | -2.8 |
| 1447819_x_at |                                                                                                                                        | -2.8 |
| 1416109_at   | 71665 fucosidase, alpha-L- 1, tissue                                                                                                   | -2.8 |
| 1418906_at   | 26425 nucleotide binding protein 1                                                                                                     | -2.8 |
| 1423347_at   | 20334 SEC23A (S. cerevisiae)                                                                                                           | -2.8 |
| 1418031_at   | 17925 myosin IXb                                                                                                                       | -2.8 |
| 1426760_at   | 320727 importin 8                                                                                                                      | -2.8 |
| 1434828_at   | 329739 RIKEN cDNA B430201A12 gene                                                                                                      | -2.8 |
| 1433542_at   | 101490 inositol polyphosphate-5-phosphatase F                                                                                          | -2.8 |
| 1451602_at   | 72183 sorting nexin 6                                                                                                                  | -2.7 |
| 1433735_a_at | 100201 RIKEN cDNA 9630015D15 gene                                                                                                      | -2.7 |
| 1415943_at   | 20969 syndecan 1                                                                                                                       | -2.7 |
| 1420628_at   | 19290 /// 70733 purine rich element binding protein A /// RIKEN cDNA 6330411E07 gene                                                   | -2.7 |
| 1460319_at   | 53618 fucosyltransferase 8                                                                                                             | -2.7 |
| 1415796_at   | 23994 DAZ associated protein 2                                                                                                         | -2.7 |
| 1452592_at   | 211666 microsomal glutathione S-transferase 2                                                                                          | -2.7 |
| 1416135_at   | 11792 apurinic/aprimidinic endonuclease 1                                                                                              | -2.7 |
| 1424906_at   | 217430 RIKEN cDNA E030024M05 gene                                                                                                      | -2.7 |
| 1430656_a_at | 70396 RIKEN cDNA 2210409M21 gene                                                                                                       | -2.7 |
| 1452367_at   | 107684 coronin, actin binding protein 2A                                                                                               | -2.7 |
| 1428408_a_at | 52635 DNA segment, Chr 12, ERATO Doi 551, expressed                                                                                    | -2.7 |
| 1436534_at   | 20822 Sjogren syndrome antigen A2                                                                                                      | -2.7 |
| 1416908_s_at | 22099 translin                                                                                                                         | -2.7 |
| 1418296_at   | 18301 FXYP domain-containing ion transport regulator 5                                                                                 | -2.7 |
| 1436716_at   | Transcribed locus, strongly similar to XP_370630.2 PREDICTED: protein phosphatase 1, regulatory (inhibitor) subunit 14B [Homo sapiens] | -2.7 |
| 1426682_at   | 104625 CCR4-NOT transcription complex, subunit 6                                                                                       | -2.7 |
| 1433620_at   |                                                                                                                                        | -2.7 |
| 1417825_at   | 13885 esterase D/formylglutathione hydrolase                                                                                           | -2.7 |
| 1429456_a_at | 26939 polymerase (RNA) III (DNA directed) polypeptide E                                                                                | -2.6 |
| 1433951_at   | 75423 ADP-ribosylation factor-like 5                                                                                                   | -2.6 |
| 1450981_at   | 12798 calponin 2                                                                                                                       | -2.6 |
| 1449145_a_at | 12389 caveolin, caveolae protein 1                                                                                                     | -2.6 |
| 1424005_at   | 78521 RIKEN cDNA B230219D22 gene                                                                                                       | -2.6 |
| 1428608_at   | 67938 myosin light chain, regulatory B                                                                                                 | -2.6 |
| 1448894_at   | 14187 aldo-keto reductase family 1, member B8                                                                                          | -2.6 |
| 1439965_at   | Transcribed locus                                                                                                                      | -2.6 |
| 1435076_at   | 116972 RIKEN cDNA 2310047D13 gene                                                                                                      | -2.6 |
| 1451066_at   | 77582 leukocyte receptor cluster (LRC) member 4                                                                                        | -2.6 |
| 1416407_at   | 18611 phosphoprotein enriched in astrocytes 15                                                                                         | -2.6 |
| 1423570_at   | 11307 ATP-binding cassette, sub-family G (WHITE), member 1                                                                             | -2.6 |
| 1428270_at   | 76485 glycosyltransferase 8 domain containing 1                                                                                        | -2.6 |
| 1447754_x_at | 67026 THAP domain containing 4                                                                                                         | -2.6 |
| 1418066_at   | 12632 cofilin 2, muscle                                                                                                                | -2.6 |
| 1423567_a_at | 26444 proteasome (prosome, macropain) subunit, alpha type 7                                                                            | -2.6 |
| 1451175_at   | 76687 signal peptidase complex subunit 3 homolog (S. cerevisiae)                                                                       | -2.6 |
| 1452111_at   | 232536 mitochondrial ribosomal protein S35                                                                                             | -2.6 |
| 1418996_a_at | 67636 RIKEN cDNA 4930469P12 gene                                                                                                       | -2.6 |
| 1452147_at   | 218811 SEC24 related gene family, member C (S. cerevisiae)                                                                             | -2.6 |
| 1428140_at   | 67041 3-oxoacid CoA transferase 1                                                                                                      | -2.5 |
| 1455538_at   | 109169 RIKEN cDNA 6330403M23 gene                                                                                                      | -2.5 |
| 1451218_at   | 192193 ER degradation enhancer, mannosidase alpha-like 1                                                                               | -2.5 |
| 1417911_at   | 12428 cyclin A2                                                                                                                        | -2.5 |
| 1421876_at   | 26420 mitogen activated protein kinase 9                                                                                               | -2.5 |
| 1423701_at   | 71743 Coenzyme A synthase                                                                                                              | -2.5 |
| 1424186_at   | 67896 RIKEN cDNA 2610001E17 gene                                                                                                       | -2.5 |



|              |                                                                                               |      |
|--------------|-----------------------------------------------------------------------------------------------|------|
| 1433530_at   | 70164 RIKEN cDNA 2210411K19 gene                                                              | -2.5 |
| 1425542_a_at | 26931 protein phosphatase 2, regulatory subunit B (B56), gamma isoform                        | -2.5 |
| 1445626_at   | 16854 Lectin, galactose binding, soluble 3                                                    | -2.5 |
| 1417470_at   | 80287 apolipoprotein B editing complex 3                                                      | -2.5 |
| 1417378_at   |                                                                                               | -2.5 |
| 1423680_at   | 76267 fatty acid desaturase 1                                                                 | -2.5 |
| 1416260_a_at | 56440 sorting nexin 1                                                                         | -2.4 |
| 1437133_x_at | 11677 /// aldo-keto reductase family 1, member B3 (aldose reductase) /// similar to Aldo-keto | -2.4 |
|              | 432549 reductase family 1, member B3 (aldose reductase)                                       |      |
| 1439790_at   | Transcribed locus                                                                             | -2.4 |
| 1451015_at   | 21881 transketolase                                                                           | -2.4 |
| 1417399_at   | 14456 growth arrest specific 6                                                                | -2.4 |
| 1423097_s_at | 12339 calpain 7                                                                               | -2.3 |
| 1427296_at   | 218236 cDNA sequence BC010304                                                                 | -2.3 |
| 1451176_at   | 228607 RIKEN cDNA D430028G21 gene                                                             | -2.3 |
| 1424661_at   | 66865 peptidase (mitochondrial processing) alpha                                              | -2.3 |
| 1433481_at   | 231997 FK506 binding protein 14                                                               | -2.3 |
| 1416209_at   | 14661 glutamate dehydrogenase 1                                                               | -2.3 |
| 1417376_a_at | 54725 immunoglobulin superfamily, member 4A                                                   | -2.2 |
| 1452942_at   | 74868 RIKEN cDNA 4930438D12 gene                                                              | -2.2 |
| 1416091_at   | 17758 microtubule-associated protein 4                                                        | -2.2 |
| 1423675_at   | 230484 ubiquitin specific protease 1                                                          | -2.1 |
