# Supplementary material
Source: PubMed Central journal article supplement (PMC2393758)
Supplement: pnas_0800668105_14.pdf [file pnas_0800668105_14.pdf]

**Table 9. mGEP transcripts differentially expressed after Kx2 but not Kx1 infection (Kx2-specific mGEP transcripts).**

| Upregulated transcripts |         |                                                                                                                                 |                                          |
|-------------------------|---------|---------------------------------------------------------------------------------------------------------------------------------|------------------------------------------|
| Affymetrix probe set ID | Gene ID | Gene description                                                                                                                | Fold change compared to uninfected mGEPs |
| 1422738_at              | 18214   | discoidin domain receptor family, member 2                                                                                      | 7.1                                      |
| 1455688_at              | 98434   | hypothetical LOC98434                                                                                                           | 6.9                                      |
| 1437199_at              | 240672  | gene model 337, (NCBI)                                                                                                          | 5.3                                      |
| 1429217_at              | 72611   | zinc finger protein 655                                                                                                         | 5.0                                      |
| 1419431_at              | 13874   | epiregulin                                                                                                                      | 4.9                                      |
| 1451888_a_at            | 23966   | odd Oz/ten-m homolog 4 (Drosophila)                                                                                             | 4.6                                      |
| 1419558_at              | 17248   | transformed mouse 3T3 cell double minute 4                                                                                      | 4.6                                      |
| 1418666_at              | 19288   | pentraxin related gene                                                                                                          | 4.6                                      |
| 1423233_at              | 12609   | CCAAT/enhancer binding protein (C/EBP), delta                                                                                   | 4.5                                      |
| 1418423_s_at            | 20709   | serine (or cysteine) proteinase inhibitor, clade B, member 9f                                                                   | 4.3                                      |
|                         | 20710   | serine (or cysteine) proteinase inhibitor, clade B, member 9e                                                                   |                                          |
|                         | 544923  | serine (or cysteine) proteinase inhibitor, clade B, member 9g                                                                   |                                          |
|                         | 93806   | similar to OTTMUSP00000000641                                                                                                   |                                          |
| 1424041_s_at            | 50908   | complement component 1, s subcomponent                                                                                          | 4.1                                      |
| 1458438_at              | 108811  | RIKEN cDNA 4933415L06 gene                                                                                                      | 4.0                                      |
| 1448014_s_at            | 329908  | ubiquitin specific protease 24                                                                                                  | 4.0                                      |
| 1430062_at              | 214305  | RIKEN cDNA 1600002O04 gene                                                                                                      | 3.9                                      |
| 1454976_at              |         | Adult male urinary bladder cDNA, RIKEN full-length enriched library, clone:9530055M18 product:unknown EST, full insert sequence | 3.8                                      |
| 1448263_a_at            | 66054   | CNDP dipeptidase 2 (metallopeptidase M20 family)                                                                                | 3.6                                      |
| 1419758_at              | 18671   | ATP-binding cassette, sub-family B (MDR/TAP), member 1A                                                                         | 3.6                                      |
| 1451340_at              | 214855  | AT rich interactive domain 5A (Mrf1 like)                                                                                       | 3.6                                      |
| 1419702_at              | 21339   | TATA box binding protein (Tbp)-associated factor, RNA polymerase I, A                                                           | 3.6                                      |
| 1419523_at              | 13113   | cytochrome P450, family 3, subfamily a, polypeptide 13                                                                          | 3.6                                      |
| 1438045_at              | 216238  | early endosome antigen 1                                                                                                        | 3.6                                      |
| 1422264_s_at            | 16601   | Kruppel-like factor 9                                                                                                           | 3.5                                      |
| 1435400_at              | 69765   | RIKEN cDNA 2900075B16 gene                                                                                                      | 3.4                                      |
| 1418673_at              | 20583   | snail homolog 2 (Drosophila)                                                                                                    | 3.4                                      |
| 1422804_at              | 20708   | serine (or cysteine) proteinase inhibitor, clade B, member 6b                                                                   | 3.4                                      |
| 1423434_at              | 21676   | TEA domain family member 1                                                                                                      | 3.4                                      |
| 1437615_s_at            | 107305  | RIKEN cDNA 5730409F24 gene                                                                                                      | 3.3                                      |
| 1454862_at              | 208177  | pleckstrin homology-like domain, family B, member 2                                                                             | 3.3                                      |
| 1436119_at              | 216188  | aldehyde dehydrogenase 1 family, member L2                                                                                      | 3.3                                      |
| 1435248_a_at            | 107182  | BTA1 RNA polymerase II, B-TFIID transcription factor-associated, 170kDa (Mot1 homolog, S. cerevisiae)                           | 3.2                                      |
| 1438167_x_at            | 216805  | Folliculin                                                                                                                      | 3.2                                      |
| 1437884_at              | 75869   | ADP-ribosylation factor-like 8                                                                                                  | 3.2                                      |
| 1455908_a_at            | 74617   | serine carboxypeptidase 1                                                                                                       | 3.2                                      |
| 1437495_at              | 270669  | membrane-bound transcription factor protease, site 2                                                                            | 3.2                                      |
| 1434813_x_at            | 22375   | tryptophanyl-tRNA synthetase                                                                                                    | 3.1                                      |
| 1434113_a_at            | 227656  | XPMC2 prevents mitotic catastrophe 2 homolog (Xenopus laevis)                                                                   | 3.1                                      |
| 1460369_at              | 233987  | cDNA sequence BC003267                                                                                                          | 3.1                                      |
| 1438992_x_at            | 11911   | activating transcription factor 4                                                                                               | 3.0                                      |
| 1433850_at              | 232314  | protein phosphatase 4, regulatory subunit 2                                                                                     | 3.0                                      |
| 1427046_at              | 252973  | transcription factor CP2-like 3                                                                                                 | 2.9                                      |
| 1418115_s_at            | 64164   | interferon alpha responsive gene                                                                                                | 2.9                                      |
| 1422864_at              | 12394   | runt related transcription factor 1                                                                                             | 2.9                                      |
| 1428419_at              | 71423   | RIKEN cDNA 5430411K18 gene                                                                                                      | 2.9                                      |
| 1418248_at              | 11605   | galactosidase, alpha                                                                                                            | 2.8                                      |
| 1433962_at              | 328162  | RIKEN cDNA 6720458F09 gene                                                                                                      | 2.8                                      |
| 1438133_a_at            | 16007   | cysteine rich protein 61                                                                                                        | 2.8                                      |
| 1418850_at              | 13831   | enhancer of polycomb homolog 1 (Drosophila)                                                                                     | 2.8                                      |
| 1421065_at              | 16452   | Janus kinase 2                                                                                                                  | 2.8                                      |
| 1460370_at              | 72960   | DNA topoisomerase 1, mitochondrial                                                                                              | 2.8                                      |
| 1418350_at              | 15200   | heparin-binding EGF-like growth factor                                                                                          | 2.7                                      |
| 1424866_at              | 216835  | ubiquitin specific protease 43                                                                                                  | 2.7                                      |
| 1428936_at              | 67972   | ATPase, Ca++ transporting, plasma membrane 1                                                                                    | 2.7                                      |
| 1440527_at              |         | Transcribed locus                                                                                                               | 2.7                                      |
| 1430417_s_at            | 216860  | RIKEN cDNA 0610025P10 gene                                                                                                      | 2.7                                      |
| 1452062_at              | 212627  | phosphoribosyl pyrophosphate synthetase-associated protein 2                                                                    | 2.7                                      |
| 1429650_at              | 74178   | serine/threonine kinase 40                                                                                                      | 2.6                                      |
| 1436684_a_at            | 67045   | RIO kinase 2 (yeast)                                                                                                            | 2.6                                      |
| 1437650_at              | 331006  | hypothetical protein C730026J16                                                                                                 | 2.6                                      |

|              |                                                                                                        |     |
|--------------|--------------------------------------------------------------------------------------------------------|-----|
| 1429491_s_at | 51869 Rap1 interacting factor 1 homolog (yeast)                                                        | 2.6 |
| 1428771_at   | 76788 RIKEN cDNA 2410127E18 gene                                                                       | 2.5 |
| 1453119_at   | 71198 OTU domain containing 1                                                                          | 2.5 |
| 1454725_at   | 101214 RIKEN cDNA G430041M01 gene                                                                      | 2.5 |
| 1430300_at   | 52892 SCO cytochrome oxidase deficient homolog 1 (yeast)                                               | 2.4 |
| 1418114_at   | 19664 recombining binding protein suppressor of hairless (Drosophila)                                  | 2.4 |
| 1424507_at   | 225870 Ras and Rab interactor 1                                                                        | 2.4 |
| 1427364_a_at | 18263 /// ornithine decarboxylase, structural 1 /// similar to Ornithine decarboxylase (ODC)<br>545783 | 2.4 |
| 1429778_at   | 71648 optineurin                                                                                       | 2.3 |
| 1416951_a_at | 73834 ATPase, H+ transporting, V1 subunit D                                                            | 2.2 |

#### Downregulated transcripts

| Affymetrix probe set ID | Gene ID | Gene description                                                     | Fold change compared to uninfected mGEPs |
|-------------------------|---------|----------------------------------------------------------------------|------------------------------------------|
| 1451305_at              | 73739   | PKD2 interactor, golgi and endoplasmic reticulum associated 1        | -7.0                                     |
| 1452301_at              | 67689   | aldehyde dehydrogenase 3 family, member B1                           | -5.4                                     |
| 1460257_a_at            | 107885  | 5, 10-methenyltetrahydrofolate synthetase                            | -5.2                                     |
| 1421161_at              | 12223   | betacellulin, epidermal growth factor family member                  | -4.9                                     |
| 1438475_at              |         |                                                                      | -4.9                                     |
| 1424014_at              | 67278   | RIKEN cDNA 2900092E17 gene                                           | -4.6                                     |
| 1426669_at              | 223978  | RIKEN cDNA C530044N13 gene                                           | -4.4                                     |
| 1438483_at              |         |                                                                      | -4.3                                     |
| 1415977_at              | 71780   | myo-inositol 1-phosphate synthase A1                                 | -4.2                                     |
| 1439296_at              | 18824   | Proteolipid protein 2                                                | -4.2                                     |
| 1450396_at              | 20843   | stromal antigen 2                                                    | -4.2                                     |
| 1428903_at              | 73172   | RIKEN cDNA 3110037I16 gene                                           | -4.2                                     |
| 1422853_at              | 20416   | src homology 2 domain-containing transforming protein C1             | -4.0                                     |
| 1451560_at              | 233210  | cDNA sequence BC058674                                               | -4.0                                     |
| 1426873_s_at            | 16480   | junction plakoglobin                                                 | -3.8                                     |
| 1433639_at              | 215512  | RIKEN cDNA 5730593F17 gene                                           | -3.7                                     |
| 1425580_a_at            | 225326  | phosphoinositide-3-kinase, class 3                                   | -3.7                                     |
| 1416558_at              | 17279   | maternal embryonic leucine zipper kinase                             | -3.7                                     |
| 1460241_a_at            | 20454   | ST3 beta-galactoside alpha-2,3-sialyltransferase 5                   | -3.6                                     |
| 1434787_at              | 105930  | expressed sequence AI854770                                          | -3.6                                     |
| 1416319_at              | 11534   | adenosine kinase                                                     | -3.4                                     |
| 1422499_at              | 65970   | DNA segment, Chr 15, ERATO Doi 366, expressed                        | -3.4                                     |
| 1448300_at              | 66447   | microsomal glutathione S-transferase 3                               | -3.4                                     |
| 1434119_at              | 227695  | DNA segment, Chr 2, Wayne State University 81, expressed             | -3.4                                     |
| 1421546_a_at            | 26934   | Rac GTPase-activating protein 1                                      | -3.3                                     |
| 1416125_at              | 14229   | FK506 binding protein 5                                              | -3.3                                     |
| 1416897_at              | 80285   | poly (ADP-ribose) polymerase family, member 9                        | -3.3                                     |
| 1449207_a_at            | 19348   | kinesin family member 20A                                            | -3.2                                     |
| 1416028_a_at            | 15374   | hematological and neurological expressed sequence 1                  | -3.2                                     |
| 1423946_at              | 213019  | PDZ and LIM domain 2                                                 | -3.2                                     |
| 1423246_at              | 76299   | thioredoxin domain containing 4 (endoplasmic reticulum)              | -3.2                                     |
| 1417427_at              | 68209   | RIKEN cDNA 1500026D16 gene                                           | -3.2                                     |
| 1448619_at              | 13360   | 7-dehydrocholesterol reductase                                       | -3.2                                     |
| 1423493_a_at            | 18032   | nuclear factor I/X                                                   | -3.2                                     |
| 1423813_at              | 110033  | kinesin family member 22                                             | -3.2                                     |
| 1451835_at              | 223227  | SRY-box containing gene 21                                           | -3.1                                     |
| 1453229_s_at            | 66576   | ubiquinol-cytochrome c reductase hinge protein                       | -3.1                                     |
| 1435630_s_at            | 110460  | acetyl-Coenzyme A acetyltransferase 2                                | -3.1                                     |
| 1422525_at              | 11958   | ATP synthase, H+ transporting, mitochondrial F1F0 complex, subunit e | -3.0                                     |
| 1425804_at              | 15372   | H6 homeo box 2                                                       | -3.0                                     |
| 1428819_at              | 13589   | microtubule-associated protein, RP/EB family, member 1               | -3.0                                     |
| 1428296_at              | 66491   | polymerase (RNA) II (DNA directed) polypeptide L                     | -3.0                                     |
| 1421824_at              | 23821   | beta-site APP cleaving enzyme 1                                      | -3.0                                     |
| 1422653_at              | 68121   | RIKEN cDNA C030018L16 gene                                           | -3.0                                     |
| 1448095_at              |         | Transcribed locus                                                    | -3.0                                     |
| 1420619_a_at            | 14797   | amino-terminal enhancer of split                                     | -2.9                                     |
| 1424882_a_at            | 70021   | RIKEN cDNA 2510015F01 gene                                           | -2.9                                     |
| 1455381_at              | 320675  | RIKEN cDNA 4921513D23 gene                                           | -2.9                                     |
| 1422513_at              | 12449   | cyclin F                                                             | -2.9                                     |
| 1416429_a_at            | 12359   | catalase                                                             | -2.9                                     |
| 1417403_at              | 170439  | ELOVL family member 6, elongation of long chain fatty acids (yeast)  | -2.9                                     |
| 1448609_at              | 22117   | thiosulfate sulfurtransferase, mitochondrial                         | -2.8                                     |
| 1431081_a_at            | 70310   | phospholipid scramblase 3                                            | -2.8                                     |

|              |                                                                                                         |      |
|--------------|---------------------------------------------------------------------------------------------------------|------|
| 1438868_at   | 219132 DNA segment, Chr 14, ERATO Doi 668, expressed                                                    | -2.7 |
| 1426297_at   | 21423 transcription factor E2a                                                                          | -2.7 |
| 1416079_a_at | 56443 actin related protein 2/3 complex, subunit 1A                                                     | -2.7 |
| 1434911_s_at | 71085 Rho GTPase activating protein 19                                                                  | -2.7 |
| 1416555_at   | 13663 etoposide induced 2.4 mRNA                                                                        | -2.7 |
| 1418300_a_at | 17347 MAP kinase-interacting serine/threonine kinase 2                                                  | -2.7 |
| 1450627_at   | 11732 progressive ankylosis                                                                             | -2.7 |
| 1416410_at   | 18476 platelet-activating factor acetylhydrolase, isoform 1b, alpha1 subunit                            | -2.7 |
| 1430640_a_at | 19088 protein kinase, cAMP dependent regulatory, type II beta                                           | -2.7 |
| 1453380_a_at | 68876 RIKEN cDNA 2410012H02 gene                                                                        | -2.7 |
| 1416076_at   | 12429 /// cyclin B1, related sequence 1 /// cyclin B1 /// similar to G2/mitotic-specific cyclin B1      | -2.6 |
|              | 268697 ///                                                                                              |      |
|              | 434175                                                                                                  |      |
| 1416664_at   | 107995 cell division cycle 20 homolog (S. cerevisiae)                                                   | -2.6 |
| 1426146_a_at | 212862 choline phosphotransferase 1                                                                     | -2.6 |
| 1449125_at   | 66443 tumor necrosis factor, alpha-induced protein 8-like 1                                             | -2.6 |
| 1417419_at   | 12443 cyclin D1                                                                                         | -2.6 |
| 1448943_at   | 18186 neuropilin 1                                                                                      | -2.6 |
| 1422459_a_at | 23997 proteasome (prosome, macropain) 26S subunit, non-ATPase, 13                                       | -2.5 |
| 1451209_at   | 71949 longevity assurance homolog 5 (S. cerevisiae)                                                     | -2.5 |
| 1428451_at   | 72946 leucine rich repeat containing 47                                                                 | -2.5 |
| 1419943_s_at | 268697 cyclin B1                                                                                        | -2.5 |
| 1423648_at   | 71853 protein disulfide isomerase associated 6                                                          | -2.5 |
| 1416127_a_at | 13437 aspartyl aminopeptidase                                                                           | -2.4 |
| 1452587_at   | 66713 ARP2 actin-related protein 2 homolog (yeast)                                                      | -2.4 |
| 1422676_at   | 57376 SWI/SNF related, matrix associated, actin dependent regulator of chromatin, subfamily e, member 1 | -2.4 |
| 1419976_s_at | 18021 nuclear factor of activated T-cells, cytoplasmic, calcineurin-dependent 3                         | -2.4 |
| 1422184_a_at | 11636 adenylate kinase 1                                                                                | -2.2 |
