# Supplementary material
Source: PubMed Central journal article supplement (PMC2393758)
Supplement: pnas_0800668105_15.pdf [file pnas_0800668105_15.pdf]

**Table 10. Differentially expressed mGEP transcripts that are changed only after Kx1 infection and only in mGEPs (not npGECs). (Kx1-specific and progenitor-specific mGEP transcripts)**

| Upregulated transcripts |         |                                                                                             |                                          |
|-------------------------|---------|---------------------------------------------------------------------------------------------|------------------------------------------|
| Affymetrix probe set ID | Gene ID | Gene description                                                                            | Fold change compared to uninfected mGEPs |
| 1420515_a_at            | 57757   | peptidoglycan recognition protein 2                                                         | 81.0                                     |
| 1441150_x_at            |         | Transcribed locus                                                                           | 43.2                                     |
| 1421682_a_at            | 21647   | t-complex-associated testis expressed 3                                                     | 37.1                                     |
| 1423172_at              | 17957   | N-ethylmaleimide sensitive fusion protein attachment protein beta                           | 29.8                                     |
| 1450582_at              | 15016   | histocompatibility 2, Q region locus 5                                                      | 29.6                                     |
| 1440207_at              | 99010   | expressed sequence AI505034                                                                 | 29.5                                     |
| 1453851_a_at            | 23882   | growth arrest and DNA-damage-inducible 45 gamma                                             | 29.0                                     |
| 1417813_at              | 56489   | inhibitor of kappaB kinase epsilon                                                          | 28.6                                     |
| 1420057_at              | 107817  | Phosphatidylserine receptor                                                                 | 22.8                                     |
| 1419241_a_at            | 11634   | autoimmune regulator (autoimmune polyendocrinopathy candidiasis ectodermal dystrophy)       | 19.2                                     |
| 1427410_at              | 328425  | deleted in lymphocytic leukemia, 2                                                          | 18.9                                     |
| 1452418_at              | 319202  | RIKEN cDNA 1200016E24 gene                                                                  | 17.9                                     |
| 1457135_at              | 245827  | fat tumor suppressor homolog 2 (Drosophila)                                                 | 17.7                                     |
| 1434774_at              | 217344  | rhomboid, veinlet-like 6 (Drosophila)                                                       | 15.6                                     |
| 1434582_at              | 238988  | DNA segment, Chr 14, ERATO Doi 171, expressed                                               | 15.3                                     |
| 1420958_at              |         |                                                                                             | 15.0                                     |
| 1432466_a_at            | 11816   | apolipoprotein E                                                                            | 14.1                                     |
| 1450430_at              | 17533   | mannose receptor, C type 1                                                                  | 11.9                                     |
| 1424959_at              | 69787   | annexin A13                                                                                 | 11.1                                     |
| 1448026_at              | 320790  | Chromodomain helicase DNA binding protein 7                                                 | 11.0                                     |
| 1417812_a_at            | 16780   | laminin, beta 3                                                                             | 10.3                                     |
| 1455965_at              |         |                                                                                             | 10.1                                     |
| 1416920_at              | 19653   | RNA binding motif protein 4                                                                 | 8.3                                      |
| 1428306_at              | 74747   | DNA-damage-inducible transcript 4                                                           | 8.2                                      |
| 1424490_at              | 232969  | RIKEN cDNA 2410005H09 gene                                                                  | 8.2                                      |
| 1440143_at              | 239827  | RIKEN cDNA F630022B06 gene                                                                  | 8.2                                      |
| 1452684_at              | 67605   | AKT1 substrate 1 (proline-rich)                                                             | 8.2                                      |
| 1438148_at              | 330122  | gene model 1960, (NCBI)                                                                     | 8.1                                      |
| 1452198_at              | 30841   | F-box and leucine-rich repeat protein 10                                                    | 7.8                                      |
| 1419682_a_at            | 381406  | TP53 regulating kinase /// similar to mNori-2p                                              | 7.4                                      |
|                         | 76367   |                                                                                             |                                          |
| 1420450_at              | 17384   | matrix metalloproteinase 10                                                                 | 7.2                                      |
| 1418465_at              | 17972   | neutrophil cytosolic factor 4                                                               | 6.9                                      |
| 1452595_at              | 240913  | a disintegrin-like and metalloprotease (repolysin type) with thrombospondin type 1 motif, 4 | 6.7                                      |
| 1449473_s_at            | 21939   | tumor necrosis factor receptor superfamily, member 5                                        | 6.6                                      |
| 1431965_at              | 71067   | RIKEN cDNA 4933411E08 gene                                                                  | 6.6                                      |
| 1422705_at              | 65112   | transmembrane, prostate androgen induced RNA                                                | 6.3                                      |
| 1449396_at              | 11754   | amine oxidase, copper containing 3                                                          | 6.3                                      |
| 1441935_at              | 68558   | ankyrin repeat, family A (RFXANK-like), 2                                                   | 6.2                                      |
| 1429726_at              | 66859   | solute carrier family 16 (monocarboxylic acid transporters), member 9                       | 6.1                                      |
| 1455666_at              | 218314  | RIKEN cDNA A230042K10 gene                                                                  | 6.0                                      |
| 1425681_a_at            | 26434   | prion protein dublet                                                                        | 6.0                                      |
| 1444086_at              | 210356  | RIKEN cDNA E030049G20 gene                                                                  | 6.0                                      |
| 1447494_at              | 52819   | DNA segment, Chr 7, Brigham & Women's Genetics 0826 expressed                               | 5.9                                      |
| 1427987_at              | 224902  | scaffold attachment factor B2                                                               | 5.9                                      |
| 1421267_a_at            | 17684   | Cbp/p300-interacting transactivator, with Glu/Asp-rich carboxy-terminal domain, 2           | 5.9                                      |
| 1424382_at              | 52377   | reticulocalbin 3, EF-hand calcium binding domain                                            | 5.8                                      |
| 1453721_a_at            | 20530   | solute carrier family 31, member 2                                                          | 5.8                                      |
| 1422838_at              | 16532   | potassium large conductance pH-sensitive channel, subfamily M, alpha member 3               | 5.7                                      |
| 1425614_x_at            | 14964   | histocompatibility 2, D region locus 1                                                      | 5.7                                      |
| 1426990_at              | 65969   | cubilin (intrinsic factor-cobalamin receptor)                                               | 5.6                                      |
| 1427047_at              | 227699  | nucleoporin 188                                                                             | 5.6                                      |
| 1429445_at              | 70894   | RIKEN cDNA 4921510J17 gene                                                                  | 5.6                                      |
| 1417713_at              | 67204   | eukaryotic translation initiation factor 2, subunit 2 (beta)                                | 5.6                                      |
| 1422035_at              | 20707   | serine (or cysteine) proteinase inhibitor, clade B, member 9c                               | 5.5                                      |
| 1428492_at              | 384009  | GLI pathogenesis-related 2                                                                  | 5.4                                      |
| 1419450_at              | 66612   | ORM1-like 3 (S. cerevisiae)                                                                 | 5.3                                      |
| 1419399_at              | 17777   | microsomal triglyceride transfer protein                                                    | 5.2                                      |
| 1421446_at              | 18752   | protein kinase C, gamma                                                                     | 5.2                                      |
| 1427957_at              | 109254  | RIKEN cDNA 9530008L14 gene                                                                  | 5.1                                      |
| 1457268_at              | 208266  | DOT1-like, histone H3 methyltransferase (S. cerevisiae)                                     | 5.1                                      |
| 1423389_at              | 17131   | MAD homolog 7 (Drosophila)                                                                  | 5.0                                      |
| 1434830_at              | 17119   | Max dimerization protein                                                                    | 5.0                                      |
| 1443951_at              | 320496  | RIKEN cDNA C230076A16 gene                                                                  | 5.0                                      |
| 1416401_at              | 12521   | kangai 1 (suppression of tumorigenicity 6, prostate)                                        | 5.0                                      |
| 1449891_a_at            | 73379   | discoidin, CUB and LCCL domain containing 2                                                 | 4.9                                      |
| 1418808_at              | 19682   | retinol dehydrogenase 5                                                                     | 4.8                                      |

|              |                                                                                                      |     |
|--------------|------------------------------------------------------------------------------------------------------|-----|
| 1427691_a_at | 15976 interferon (alpha and beta) receptor 2                                                         | 4.8 |
| 1435499_at   | 270035 RIKEN cDNA D030041N04 gene                                                                    | 4.8 |
| 1450922_a_at | 21808 transforming growth factor, beta 2                                                             | 4.7 |
| 1430762_at   | 235345 RIKEN cDNA 4833427G06 gene                                                                    | 4.7 |
| 1427079_at   | 100732 microtubule-associated protein, RP/EB family, member 3                                        | 4.7 |
| 1455765_a_at | 20927 ATP-binding cassette, sub-family C (CFTR/MRP), member 8                                        | 4.6 |
| 1450100_a_at | 56070 transcription elongation regulator 1 (CA150)                                                   | 4.5 |
| 1422945_a_at | 16574 kinesin family member 5C                                                                       | 4.5 |
| 1440686_at   | 213171 protease, serine 27                                                                           | 4.5 |
| 1420772_a_at | 14605 TSC22 domain family 3                                                                          | 4.4 |
| 1454928_at   | 224903 scaffold attachment factor B                                                                  | 4.4 |
| 1417393_a_at | 67389 RIKEN cDNA 1110035L05 gene                                                                     | 4.4 |
| 1459920_at   | Transcribed locus                                                                                    | 4.4 |
| 1433523_at   | 231858 RIKEN cDNA D930005D10 gene                                                                    | 4.4 |
| 1436074_at   | 243910 cDNA sequence AY078069                                                                        | 4.4 |
| 1416600_a_at | 54720 Down syndrome critical region homolog 1 (human)                                                | 4.4 |
| 1425019_at   | 217379 UBX domain containing 4                                                                       | 4.4 |
| 1425047_a_at | 70873 RIKEN cDNA 4921517L17 gene                                                                     | 4.3 |
| 1453345_at   | 70701 RIKEN cDNA 3830408G10 gene                                                                     | 4.3 |
| 1423944_at   | 15458 hemopexin                                                                                      | 4.3 |
| 1421365_at   | 14313 follistatin                                                                                    | 4.2 |
| 1447802_x_at |                                                                                                      | 4.2 |
| 1459681_at   | Transcribed locus                                                                                    | 4.2 |
| 1448562_at   | 22271 uridine phosphorylase 1                                                                        | 4.1 |
| 1428468_at   | 73205 RIKEN cDNA 3110043O21 gene                                                                     | 4.1 |
| 1417707_at   | 100637 RIKEN cDNA B230342M21 gene                                                                    | 4.1 |
| 1426519_at   | 18451 procollagen-proline, 2-oxoglutarate 4-dioxygenase (proline 4-hydroxylase), alpha 1 polypeptide | 4.0 |
| 1424148_a_at | 106766 expressed sequence AW049765                                                                   | 4.0 |
| 1418863_at   | 14463 GATA binding protein 4                                                                         | 4.0 |
| 1427385_s_at | 109711 actinin, alpha 1                                                                              | 3.9 |
| 1416831_at   | 18010 neuraminidase 1                                                                                | 3.9 |
| 1449946_a_at | 68040 RIKEN cDNA 3110024A21 gene                                                                     | 3.8 |
| 1426681_at   | 217331 zinc finger CCCH type containing 5                                                            | 3.8 |
| 1460562_at   | 101592 elongation factor Tu GTP binding domain containing 1                                          | 3.8 |
| 1418102_at   | 15205 hairy and enhancer of split 1 (Drosophila)                                                     | 3.8 |
| 1425507_at   | 76688 ADP-ribosylation factor related protein 1                                                      | 3.8 |
| 1431646_a_at | 58244 syntaxin 6                                                                                     | 3.8 |
| 1422803_at   | 83554 follistatin-like 3                                                                             | 3.7 |
| 1425336_x_at | 14972 histocompatibility 2, K1, K region                                                             | 3.7 |
| 1448806_at   |                                                                                                      | 3.7 |
| 1439488_at   | Transcribed locus                                                                                    | 3.7 |
| 1421712_at   | 20339 selectin, endothelial cell                                                                     | 3.7 |
| 1422027_a_at | 23871 E26 avian leukemia oncogene 1, 5' domain                                                       | 3.7 |
| 1431082_a_at | 67657 RAB, member of RAS oncogene family-like 3                                                      | 3.7 |
| 1455187_at   | 230848 zinc finger and BTB domain containing 40                                                      | 3.6 |
| 1415798_at   | 12305 discoidin domain receptor family, member 1                                                     | 3.6 |
| 1450838_x_at | 383438 /// ribosomal protein L37 /// similar to ribosomal protein L37                                | 3.6 |
| 1455491_at   | 67281                                                                                                |     |
| 1459343_at   | 432467 similar to heterogeneous nuclear ribonucleoprotein H3 isoform a                               | 3.6 |
| 1419761_a_at | 217026 RIKEN cDNA 2700008B19 gene                                                                    | 3.6 |
| 1422218_at   | 14391 GA repeat binding protein, beta 1                                                              | 3.6 |
| 1428682_at   | 18439 purinergic receptor P2X, ligand-gated ion channel, 7                                           | 3.5 |
| 1418861_at   | 78751 zinc finger CCCH type containing 6                                                             | 3.5 |
| 1448050_s_at | 59004 protein inhibitor of activated STAT, 4                                                         | 3.5 |
| 1439073_at   | 26921 mitogen-activated protein kinase kinase kinase kinase 4                                        | 3.5 |
| 1422473_at   | 224585 Zinc finger protein 160                                                                       | 3.5 |
| 1452521_a_at | 18578 phosphodiesterase 4B, cAMP specific                                                            | 3.5 |
| 1425296_a_at | 18793 urokinase plasminogen activator receptor                                                       | 3.5 |
| 1421679_a_at | 50780 regulator of G-protein signaling 3                                                             | 3.4 |
| 1423117_at   | 12575 cyclin-dependent kinase inhibitor 1A (P21)                                                     | 3.4 |
| 1429052_at   | 80912 pumilio 1 (Drosophila)                                                                         | 3.4 |
| 1437969_s_at | 19266 protein tyrosine phosphatase, receptor type, D                                                 | 3.3 |
| 1422599_s_at | 68327 RIKEN cDNA 0610007P22 gene                                                                     | 3.3 |
| 1423686_a_at | 20841 zinc finger protein 143                                                                        | 3.3 |
| 1424818_at   | 66151 RIKEN cDNA 1110020C13 gene                                                                     | 3.3 |
| 1417225_at   | 223774 asparagine-linked glycosylation 12 homolog (yeast, alpha-1,6-mannosyltransferase)             | 3.3 |
| 1416290_a_at | 65106 ADP-ribosylation factor-like 6 interacting protein 5                                           | 3.3 |
| 1435852_at   | 23996 proteasome (prosome, macropain) 26S subunit, ATPase, 4                                         | 3.2 |
| 1439538_at   | 101809 sprouty-related, EVH1 domain containing 3                                                     | 3.2 |
| 1428572_at   | 67433 RIKEN cDNA 0610011N22 gene                                                                     | 3.2 |
| 1449338_at   | 70350 brain abundant, membrane attached signal protein 1                                             | 3.2 |
| 1417389_at   | 52717 DNA segment, Chr 10, ERATO Doi 641, expressed                                                  | 3.2 |
|              | 14733 glypican 1                                                                                     | 3.2 |

|              |                                                                                                  |     |
|--------------|--------------------------------------------------------------------------------------------------|-----|
| 1417500_a_at | 21817 transglutaminase 2, C polypeptide                                                          | 3.2 |
| 1430776_s_at | 70615 ankyrin repeat domain 24                                                                   | 3.2 |
| 1450113_at   |                                                                                                  | 3.2 |
| 1450534_x_at | 56628 MHC (A.CAJJ(H-2K-f) class I antigen                                                        | 3.2 |
| 1429070_at   | 71254 RIKEN cDNA 4933440H19 gene                                                                 | 3.2 |
| 1436524_at   | 107243 RIKEN cDNA 4833438C02 gene                                                                | 3.2 |
| 1434364_at   | 53859 mitogen-activated protein kinase kinase 14                                                 | 3.2 |
| 1416487_a_at | 22601 yes-associated protein 1                                                                   | 3.2 |
| 1423446_at   | 13144 death-associated kinase 3                                                                  | 3.1 |
| 1423549_at   | 55963 solute carrier family 1 (glutamate/neutral amino acid transporter), member 4               | 3.1 |
| 1417329_at   | 54338 solute carrier family 23 (nucleobase transporters), member 2                               | 3.1 |
| 1455096_at   |                                                                                                  | 3.1 |
| 1417034_at   | 67091 trafficking protein particle complex 6A                                                    | 3.1 |
| 1423085_at   | 13643 ephrin B3                                                                                  | 3.1 |
| 1458718_at   | 243025 Gene model 446, (NCBI)                                                                    | 3.1 |
| 1423970_at   | 73666 THO complex 3                                                                              | 3.1 |
| 1451123_at   | 212706 RIKEN cDNA C330016O10 gene                                                                | 3.1 |
| 1443072_at   | 171395 Polycystic kidney disease 1 like 1                                                        | 3.1 |
| 1424380_at   | 330192 cDNA sequence BC026744                                                                    | 3.0 |
| 1418453_a_at | 11931 ATPase, Na <sup>+</sup> /K <sup>+</sup> transporting, beta 1 polypeptide                   | 3.0 |
| 1416994_at   | 66827 tetratricopeptide repeat domain 1                                                          | 3.0 |
| 1431561_a_at | 71723 DEAH (Asp-Glu-Ala-His) box polypeptide 34                                                  | 3.0 |
| 1427955_a_at | 26901 differentially expressed in B16F10 1                                                       | 3.0 |
| 1428226_at   | 68966 RIKEN cDNA 1500001L15 gene                                                                 | 3.0 |
| 1416409_at   | 11430 acyl-Coenzyme A oxidase 1, palmitoyl                                                       | 3.0 |
| 1424150_at   | 233552 glycerophosphodiester phosphodiesterase domain containing 5                               | 3.0 |
| 1429463_at   | 108079 protein kinase, AMP-activated, alpha 2 catalytic subunit                                  | 3.0 |
| 1420975_at   | 22385 bromodomain adjacent to zinc finger domain, 1B                                             | 2.9 |
| 1449800_x_at | 71838 PHD finger protein 7                                                                       | 2.9 |
| 1448417_at   | 18081 ninjurin 1                                                                                 | 2.9 |
| 1439780_at   | 66229 ribosomal protein L7-like 1                                                                | 2.9 |
| 1416991_at   | 68291 mitochondrial translation optimization 1 homolog (S. cerevisiae)                           | 2.9 |
| 1442918_at   | 260315 neuron navigator 3                                                                        | 2.9 |
| 1418174_at   | 13170 D site albumin promoter binding protein                                                    | 2.8 |
| 1419087_s_at | 67465 splicing factor 3a, subunit 1                                                              | 2.8 |
| 1416615_at   | 53895 caseinolytic protease, ATP-dependent, proteolytic subunit homolog (E. coli)                | 2.8 |
| 1434726_at   | 106757 RIKEN cDNA 4933402B14 gene                                                                | 2.8 |
| 1431885_a_at | 71711 MUS81 endonuclease homolog (yeast)                                                         | 2.8 |
| 1435280_at   | 105178 expressed sequence AI452195                                                               | 2.8 |
| 1425810_a_at | 13007 cysteine and glycine-rich protein 1                                                        | 2.8 |
| 1427672_a_at | 22289 ubiquitously transcribed tetratricopeptide repeat gene, X chromosome                       | 2.8 |
| 1416186_at   | 52830 proline-rich nuclear receptor coactivator 2                                                | 2.8 |
| 1428557_a_at | 72085 O-sialoglycoprotein endopeptidase-like 1                                                   | 2.8 |
| 1427009_at   | 16776 laminin, alpha 5                                                                           | 2.8 |
| 1426898_at   | 66513 mitogen-activated protein kinase kinase kinase 7 interacting protein 1                     | 2.7 |
| 1436559_a_at | 53380 proteasome (prosome, macropain) 26S subunit, non-ATPase, 10                                | 2.7 |
| 1454771_at   |                                                                                                  | 2.7 |
| 1450798_at   | 81877 tenascin XB                                                                                | 2.7 |
| 1451095_at   | 27053 asparagine synthetase                                                                      | 2.6 |
| 1448271_a_at | 56200 DEAD (Asp-Glu-Ala-Asp) box polypeptide 21                                                  | 2.6 |
| 1417240_at   | 22793 zyxin                                                                                      | 2.6 |
| 1428675_at   | 66193 RIKEN cDNA 1110049F12 gene                                                                 | 2.6 |
| 1419046_at   | 59053 brain protein 16                                                                           | 2.6 |
| 1438062_at   | 320612 RIKEN cDNA 4832420A03 gene                                                                | 2.6 |
| 1449832_at   | 73553 RIKEN cDNA 1700091H14 gene                                                                 | 2.6 |
| 1454045_a_at | 260345 /// RIKEN cDNA 4933424M23 gene /// silencer-associated factor (Saf) pseudogene            | 2.6 |
|              | 74451                                                                                            |     |
| 1423122_at   | 69534 arginine vasopressin-induced 1                                                             | 2.6 |
| 1416038_at   | 56463 expressed sequence AL033314                                                                | 2.6 |
| 1433980_at   | 81601 HIV-1 tat interactive protein, homolog (human)                                             | 2.6 |
| 1423708_a_at | 23874 phenylalanine-tRNA synthetase-like, beta subunit                                           | 2.6 |
| 1426653_at   | 17215 minichromosome maintenance deficient 3 (S. cerevisiae)                                     | 2.6 |
| 1424250_a_at | 71704 Rho guanine nucleotide exchange factor (GEF) 3                                             | 2.5 |
| 1421378_s_at | 17250 ATP-binding cassette, sub-family C (CFTR/MRP), member 1                                    | 2.5 |
| 1424309_a_at | 17434 molybdenum cofactor synthesis 2                                                            | 2.5 |
| 1417392_a_at | 20540 solute carrier family 7 (cationic amino acid transporter, y <sup>+</sup> system), member 7 | 2.5 |
| 1428143_a_at | 66853 patatin-like phospholipase domain containing 2                                             | 2.5 |
| 1434873_a_at | 216859 centaurin, beta 1                                                                         | 2.5 |
| 1415807_s_at | 20382 splicing factor, arginine/serine-rich 2 (SC-35)                                            | 2.5 |
| 1416104_at   | 24070 mannose-P-dolichol utilization defect 1                                                    | 2.5 |
| 1423991_at   | 75416 RIKEN cDNA 2610033H07 gene                                                                 | 2.5 |
| 1434100_x_at | Transcribed locus                                                                                | 2.5 |
| 1433609_s_at | 20931 surfeit gene 2                                                                             | 2.5 |
| 1426474_at   | 246782 ATP synthase mitochondrial F1 complex assembly factor 2                                   | 2.4 |

|              |                                                                                         |     |
|--------------|-----------------------------------------------------------------------------------------|-----|
| 1421151_a_at | 13836 Eph receptor A2                                                                   | 2.4 |
| 1455887_at   | 381903 asparagine-linked glycosylation 8 homolog (yeast, alpha-1,3-glucosyltransferase) | 2.4 |
| 1416148_at   | 114128 lysosomal-associated protein transmembrane 4B                                    | 2.3 |
| 1415971_at   | 17118 myristoylated alanine rich protein kinase C substrate                             | 2.3 |
| 1434931_at   | 18007 neogenin                                                                          | 2.3 |
| 1452207_at   |                                                                                         | 2.3 |
| 1428138_s_at | 67166 ADP-ribosylation factor-like 10C                                                  | 2.2 |

#### Downregulated transcripts

| Affymetrix probe set ID | Gene ID | Gene description                                                                                 | Fold change compared to uninfected mGEPs |
|-------------------------|---------|--------------------------------------------------------------------------------------------------|------------------------------------------|
| 1428083_at              | 66961   | RIKEN cDNA 2310043N10 gene                                                                       | -11.5                                    |
| 1436761_s_at            | 71721   | RIKEN cDNA 1200015N20 gene                                                                       | -10.9                                    |
| 1423894_a_at            | 67789   | DALR anticodon binding domain containing 3                                                       | -8.2                                     |
| 1455878_at              | 70036   | RIKEN cDNA 2700023E23 gene                                                                       | -7.9                                     |
| 1429739_a_at            | 56218   | zinc finger protein 278                                                                          | -7.4                                     |
| 1419115_at              | 66789   | RIKEN cDNA 5430428G01 gene                                                                       | -7.3                                     |
| 1424515_at              | 320063  | RIKEN cDNA B230354K17 gene                                                                       | -7.2                                     |
| 1428447_at              | 75712   | transmembrane protein 14A                                                                        | -7.2                                     |
| 1418595_at              | 57435   | plasma membrane associated protein, S3-12                                                        | -7.1                                     |
| 1423667_at              | 232087  | methionine adenosyltransferase II, alpha                                                         | -7.0                                     |
| 1426350_at              | 217664  | mannoside acetylglucosaminyltransferase 2                                                        | -6.1                                     |
| 1423672_at              | 72421   | RIKEN cDNA 2510042P03 gene                                                                       | -6.0                                     |
| 1415913_at              | 68052   | ribosomal protein S13                                                                            | -5.8                                     |
| 1435612_at              | 330908  | opioid binding protein/cell adhesion molecule-like                                               | -5.7                                     |
| 1430978_at              | 75617   | ribosomal protein S25                                                                            | -5.2                                     |
| 1424544_at              | 223649  | nuclear receptor binding protein 2                                                               | -5.2                                     |
| 1416499_a_at            | 22428   | dynactin 6                                                                                       | -5.0                                     |
| 1426558_x_at            | 66376   | RIKEN cDNA 3100002L24 gene                                                                       | -5.0                                     |
| 1427020_at              | 219151  | scavenger receptor class A, member 3                                                             | -5.0                                     |
| 1417214_at              | 80718   | RAB27b, member RAS oncogene family                                                               | -4.8                                     |
| 1436959_x_at            | 56876   | nasal embryonic LHRH factor                                                                      | -4.8                                     |
| 1428113_at              | 70551   | RIKEN cDNA 4930403J22 gene                                                                       | -4.7                                     |
| 1449303_at              | 75747   | sestrin 3                                                                                        | -4.7                                     |
| 1416838_at              | 17850   | methylmalonyl-Coenzyme A mutase                                                                  | -4.6                                     |
| 1434013_at              | 319713  | actin binding LIM protein family, member 3                                                       | -4.6                                     |
| 1437471_at              | 217366  | leucine rich repeat containing 45                                                                | -4.5                                     |
| 1436756_x_at            | 15107   | L-3-hydroxyacyl-Coenzyme A dehydrogenase, short chain                                            | -4.3                                     |
| 1428256_at              | 69672   | RIKEN cDNA 2310047H23 gene                                                                       | -4.3                                     |
| 1418501_a_at            | 170719  | oxidation resistance 1                                                                           | -4.3                                     |
| 1438542_at              |         |                                                                                                  | -4.3                                     |
| 1431183_at              | 73467   | RIKEN cDNA 1700066M21 gene                                                                       | -4.3                                     |
| 1434987_at              | 11669   | aldehyde dehydrogenase 2, mitochondrial                                                          | -4.1                                     |
| 1421340_at              | 26408   | mitogen activated protein kinase kinase kinase 5                                                 | -4.1                                     |
| 1443099_at              | 432940  | Similar to LOC90268 protein                                                                      | -4.1                                     |
| 1416817_at              | 59125   | NIMA (never in mitosis gene a)-related expressed kinase 7                                        | -4.0                                     |
| 1416166_a_at            | 53381   | peroxiredoxin 4                                                                                  | -4.0                                     |
| 1452968_at              | 68588   | collagen triple helix repeat containing 1                                                        | -4.0                                     |
| 1416375_at              | 544716  | /// adaptor-related protein complex 3, mu 1 subunit /// similar to clathrin adaptor protein mu3A | -3.9                                     |
|                         | 55946   |                                                                                                  |                                          |
| 1422752_at              | 67005   | polymerase (RNA) III (DNA directed) polypeptide K                                                | -3.9                                     |
| 1415733_a_at            | 68512   | RIKEN cDNA 1110019J04 gene                                                                       | -3.9                                     |
| 1420641_a_at            | 59010   | sulfide quinone reductase-like (yeast)                                                           | -3.9                                     |
| 1433655_at              |         |                                                                                                  | -3.9                                     |
| 1451573_a_at            | 20909   | syntaxin 4A (placental)                                                                          | -3.8                                     |
| 1440559_at              | 15365   | high mobility group AT-hook 2, pseudogene 1                                                      | -3.8                                     |
| 1424696_at              | 67549   | G protein-coupled receptor 89                                                                    | -3.8                                     |
| 1435413_x_at            | 545536  | /// RIKEN cDNA 2700060E02 gene /// similar to RIKEN cDNA 2700060E02                              | -3.8                                     |
|                         | 68045   |                                                                                                  |                                          |
| 1433626_at              | 235527  | phospholipid scramblase 4                                                                        | -3.8                                     |
| 1416158_at              | 11819   | nuclear receptor subfamily 2, group F, member 2                                                  | -3.7                                     |
| 1447483_s_at            | 72091   | RIKEN cDNA 2610002F03 gene                                                                       | -3.7                                     |
| 1423121_at              | 15925   | insulin degrading enzyme                                                                         | -3.7                                     |
| 1460603_at              | 209086  | sterile alpha motif domain containing 9-like                                                     | -3.6                                     |
| 1424786_s_at            | 54636   | WD repeat domain 45                                                                              | -3.5                                     |
| 1437829_s_at            | 13631   | eukaryotic elongation factor-2 kinase                                                            | -3.5                                     |
| 1426269_at              | 20955   | synaptobrevin like 1                                                                             | -3.5                                     |
| 1435617_at              | 106606  | expressed sequence AI480743                                                                      | -3.5                                     |
| 1434312_at              | 104877  | expressed sequence AI788669                                                                      | -3.5                                     |
| 1423864_at              | 192292  | nuclear receptor binding protein                                                                 | -3.5                                     |
| 1417985_at              | 67122   | Notch-regulated ankyrin repeat protein                                                           | -3.4                                     |
| 1416759_at              | 171580  | microtubule associated monooxygenase, calponin and LIM domain containing 1                       | -3.4                                     |

|              |                                                                                                                                           |      |
|--------------|-------------------------------------------------------------------------------------------------------------------------------------------|------|
| 1421935_at   | 67427 ribosomal protein S20                                                                                                               | -3.3 |
| 1423151_at   | 67838 DnaJ (Hsp40) homolog, subfamily B, member 11                                                                                        | -3.3 |
| 1438429_at   | 72505 RIKEN cDNA 2610319H10 gene                                                                                                          | -3.3 |
| 1428718_at   | 69938 secernin 1                                                                                                                          | -3.3 |
| 1457588_at   | 97124 expressed sequence C76213                                                                                                           | -3.3 |
| 1429063_s_at | 16558 kinesin family member 16B                                                                                                           | -3.3 |
| 1442540_at   | 96961 expressed sequence C77609                                                                                                           | -3.3 |
| 1448919_at   | 66205 CD302 antigen                                                                                                                       | -3.3 |
| 1449348_at   | 56524 membrane protein, palmitoylated 6 (MAGUK p55 subfamily member 6)                                                                    | -3.3 |
| 1423218_a_at | 18120 mitochondrial ribosomal protein L49                                                                                                 | -3.3 |
| 1426880_at   | 208618 cDNA sequence BC026657                                                                                                             | -3.3 |
| 1455058_at   | 210376 myotubularin related protein 9                                                                                                     | -3.2 |
| 1427346_at   | 18422 /// ovary testis transcribed /// similar to Ott protein<br>382243                                                                   | -3.2 |
| 1435802_at   | 232879 gene model 157, (NCBI)                                                                                                             | -3.2 |
| 1428694_at   | 75957 RIKEN cDNA 5033413D16 gene                                                                                                          | -3.2 |
| 1423319_at   | 15242 hematopoietically expressed homeobox                                                                                                | -3.2 |
| 1426246_at   | 19128 protein S (alpha)                                                                                                                   | -3.2 |
| 1426387_x_at | 236604 /// RIKEN cDNA 4933439C20 gene /// phosphatidylserine decarboxylase<br>320951                                                      | -3.2 |
| 1426253_at   | 66768 RIKEN cDNA 4933428G09 gene                                                                                                          | -3.2 |
| 1426628_at   | 234463 transmembrane protein 34                                                                                                           | -3.2 |
| 1429458_at   | 67383 RIKEN cDNA 2410127L17 gene                                                                                                          | -3.2 |
| 1427074_at   | 245867 RIKEN cDNA 5330414D10 gene                                                                                                         | -3.2 |
| 1426571_at   | 101772 transmembrane protein 16A                                                                                                          | -3.1 |
| 1451277_at   | 225791 zinc binding alcohol dehydrogenase, domain containing 2                                                                            | -3.1 |
| 1421534_at   |                                                                                                                                           | -3.1 |
| 1424782_at   | 67171 RIKEN cDNA 2610318G18 gene                                                                                                          | -3.1 |
| 1432264_x_at | 20463 cytochrome c oxidase subunit VIIa polypeptide 2-like                                                                                | -3.1 |
| 1426098_a_at | 12380 calpastatin                                                                                                                         | -3.1 |
| 1428573_at   | 69993 chimerin (chimaerin) 2                                                                                                              | -3.1 |
| 1438948_x_at | 12257 benzodiazepine receptor, peripheral<br>Transcribed locus                                                                            | -3.1 |
| 1459274_at   |                                                                                                                                           | -3.1 |
| 1416412_at   | 18201 neutral sphingomyelinase (N-SMase) activation associated factor                                                                     | -3.1 |
| 1422271_at   | 19065 pancreatic polypeptide receptor 1                                                                                                   | -3.1 |
| 1434696_at   | 245866 cDNA sequence BC037708                                                                                                             | -3.0 |
| 1437403_at   | 320825 RIKEN cDNA E130306M17 gene                                                                                                         | -3.0 |
| 1428604_at   | 112422 RIKEN cDNA 2610305D13 gene                                                                                                         | -3.0 |
| 1418672_at   | 27384 aldo-keto reductase family 1, member C13                                                                                            | -3.0 |
| 1419164_at   | 26466 zinc finger protein 260                                                                                                             | -3.0 |
| 1424198_at   | 71228 discs, large homolog 5 (Drosophila)                                                                                                 | -3.0 |
| 1419635_at   | 67392 RIKEN cDNA 4833420G17 gene                                                                                                          | -3.0 |
| 1430012_at   | 68790 RIKEN cDNA 1110050K14 gene                                                                                                          | -2.9 |
| 1436448_a_at | 19224 prostaglandin-endoperoxide synthase 1                                                                                               | -2.9 |
| 1438610_a_at | 12972 Crystallin, zeta                                                                                                                    | -2.9 |
| 1460676_at   | 74158 RIKEN cDNA 1300006C06 gene                                                                                                          | -2.9 |
| 1434705_at   | 13017 C-terminal binding protein 2                                                                                                        | -2.9 |
| 1435870_at   | 20962 Synaptonemal complex protein 3                                                                                                      | -2.9 |
| 1417203_at   | 66071 ethylmalonic encephalopathy 1                                                                                                       | -2.9 |
| 1418327_at   | 68002 RIKEN cDNA 1110058L19 gene                                                                                                          | -2.9 |
| 1417373_a_at | 22145 tubulin, alpha 4                                                                                                                    | -2.9 |
| 1424884_at   | 30050 F-box and WD-40 domain protein 2                                                                                                    | -2.9 |
| 1436518_at   | 69727 ubiquitin specific protease 46                                                                                                      | -2.8 |
| 1422000_at   | 27383 aldo-keto reductase family 1, member C12                                                                                            | -2.8 |
| 1415719_s_at | 74252 armadillo repeat containing 1                                                                                                       | -2.8 |
| 1447819_x_at |                                                                                                                                           | -2.8 |
| 1418031_at   | 17925 myosin IXb                                                                                                                          | -2.8 |
| 1426760_at   | 320727 importin 8                                                                                                                         | -2.8 |
| 1434828_at   | 329739 RIKEN cDNA B430201A12 gene                                                                                                         | -2.8 |
| 1451602_at   | 72183 sorting nexin 6                                                                                                                     | -2.7 |
| 1433735_a_at | 100201 RIKEN cDNA 9630015D15 gene                                                                                                         | -2.7 |
| 1420628_at   | 19290 /// purine rich element binding protein A /// RIKEN cDNA 6330411E07 gene<br>70733                                                   | -2.7 |
| 1460319_at   | 53618 fucosyltransferase 8                                                                                                                | -2.7 |
| 1415796_at   | 23994 DAZ associated protein 2                                                                                                            | -2.7 |
| 1452592_at   | 211666 microsomal glutathione S-transferase 2                                                                                             | -2.7 |
| 1416135_at   | 11792 apurinic/apyrimidinic endonuclease 1                                                                                                | -2.7 |
| 1452367_at   | 107684 coronin, actin binding protein 2A                                                                                                  | -2.7 |
| 1436534_at   | 20822 Sjogren syndrome antigen A2                                                                                                         | -2.7 |
| 1416908_s_at | 22099 translin                                                                                                                            | -2.7 |
| 1436716_at   | Transcribed locus, strongly similar to XP_370630.2 PREDICTED: protein phosphatase 1, regulatory<br>(inhibitor) subunit 14B [Homo sapiens] | -2.7 |
| 1433620_at   |                                                                                                                                           | -2.7 |
| 1417825_at   | 13885 esterase D/formylglutathione hydrolase                                                                                              | -2.7 |

|              |                                                                                                                                                          |      |
|--------------|----------------------------------------------------------------------------------------------------------------------------------------------------------|------|
| 1429456_a_at | 26939 polymerase (RNA) III (DNA directed) polypeptide E                                                                                                  | -2.6 |
| 1428608_at   | 67938 myosin light chain, regulatory B                                                                                                                   | -2.6 |
| 1448894_at   | 14187 aldo-keto reductase family 1, member B8                                                                                                            | -2.6 |
| 1439965_at   | Transcribed locus                                                                                                                                        | -2.6 |
| 1435076_at   | 116972 RIKEN cDNA 2310047D13 gene                                                                                                                        | -2.6 |
| 1423570_at   | 11307 ATP-binding cassette, sub-family G (WHITE), member 1                                                                                               | -2.6 |
| 1447754_x_at | 67026 THAP domain containing 4                                                                                                                           | -2.6 |
| 1418066_at   | 12632 cofilin 2, muscle                                                                                                                                  | -2.6 |
| 1452111_at   | 232536 mitochondrial ribosomal protein S35                                                                                                               | -2.6 |
| 1452147_at   | 218811 SEC24 related gene family, member C (S. cerevisiae)                                                                                               | -2.6 |
| 1455538_at   | 109169 RIKEN cDNA 6330403M23 gene                                                                                                                        | -2.5 |
| 1433530_at   | 70164 RIKEN cDNA 2210411K19 gene                                                                                                                         | -2.5 |
| 1445626_at   | 16854 Lectin, galactose binding, soluble 3                                                                                                               | -2.5 |
| 1417470_at   | 80287 apolipoprotein B editing complex 3                                                                                                                 | -2.5 |
| 1417378_at   |                                                                                                                                                          | -2.5 |
| 1416260_a_at | 56440 sorting nexin 1                                                                                                                                    | -2.4 |
| 1437133_x_at | 11677 /// aldo-keto reductase family 1, member B3 (aldose reductase) /// similar to Aldo-keto reductase family<br>432549 1, member B3 (aldose reductase) | -2.4 |
| 1451015_at   | 21881 transketolase                                                                                                                                      | -2.4 |
| 1417399_at   | 14456 growth arrest specific 6                                                                                                                           | -2.4 |
| 1423097_s_at | 12339 calpain 7                                                                                                                                          | -2.3 |
| 1451176_at   | 228607 RIKEN cDNA D430028G21 gene                                                                                                                        | -2.3 |
| 1417376_a_at | 54725 immunoglobulin superfamily, member 4A                                                                                                              | -2.2 |
| 1452942_at   | 74868 RIKEN cDNA 4930438D12 gene                                                                                                                         | -2.2 |
