# Supplementary material
Source: PubMed Central journal article supplement (PMC2393758)
Supplement: pnas_0800668105_16.pdf [file pnas_0800668105_16.pdf]

**Table 11. Differentially expressed mGEP transcripts that are changed only after Kx2 infection and only in mGEPs (not npGECs). (Kx2-specific and progenitor-specific mGEP transcripts)**

| Upregulated transcripts   |            |                                                                                                                                 |                                          |
|---------------------------|------------|---------------------------------------------------------------------------------------------------------------------------------|------------------------------------------|
| Affymetrix probe set ID   | Gene ID    | Gene description                                                                                                                | Fold change compared to uninfected mGEPs |
| 1455688_at                | 98434      | hypothetical LOC98434                                                                                                           | 6.9                                      |
| 1437199_at                | 240672     | gene model 337, (NCBI)                                                                                                          | 5.3                                      |
| 1429217_at                | 72611      | zinc finger protein 655                                                                                                         | 5.0                                      |
| 1451888_a_at              | 23966      | odd Oz/ten-m homolog 4 (Drosophila)                                                                                             | 4.6                                      |
| 1419558_at                | 17248      | transformed mouse 3T3 cell double minute 4                                                                                      | 4.6                                      |
| 1418423_s_at              | 20709 ///  | serine (or cysteine) proteinase inhibitor, clade B, member 9f /// serine (or cysteine) proteinase                               | 4.3                                      |
|                           | 20710 ///  | inhibitor, clade B, member 9e /// serine (or cysteine) proteinase inhibitor, clade B, member 9g ///                             |                                          |
|                           | 544923 /// | similar to OTTMUSP0000000641                                                                                                    |                                          |
|                           | 93806      |                                                                                                                                 |                                          |
| 1424041_s_at              | 50908      | complement component 1, s subcomponent                                                                                          | 4.1                                      |
| 1458438_at                | 108811     | RIKEN cDNA 4933415L06 gene                                                                                                      | 4.0                                      |
| 1448014_s_at              | 329908     | ubiquitin specific protease 24                                                                                                  | 4.0                                      |
| 1430062_at                | 214305     | RIKEN cDNA 1600002O04 gene                                                                                                      | 3.9                                      |
| 1454976_at                |            | Adult male urinary bladder cDNA, RIKEN full-length enriched library, clone:9530055M18 product:unknown EST, full insert sequence | 3.8                                      |
| 1448263_a_at              | 66054      | CNDP dipeptidase 2 (metallopeptidase M20 family)                                                                                | 3.6                                      |
| 1419758_at                | 18671      | ATP-binding cassette, sub-family B (MDR/TAP), member 1A                                                                         | 3.6                                      |
| 1419702_at                | 21339      | TATA box binding protein (Tbp)-associated factor, RNA polymerase I, A                                                           | 3.6                                      |
| 1419523_at                | 13113      | cytochrome P450, family 3, subfamily a, polypeptide 13                                                                          | 3.6                                      |
| 1438045_at                | 216238     | early endosome antigen 1                                                                                                        | 3.6                                      |
| 1422264_s_at              | 16601      | Kruppel-like factor 9                                                                                                           | 3.5                                      |
| 1418673_at                | 20583      | snail homolog 2 (Drosophila)                                                                                                    | 3.4                                      |
| 1422804_at                | 20708      | serine (or cysteine) proteinase inhibitor, clade B, member 6b                                                                   | 3.4                                      |
| 1423434_at                | 21676      | TEA domain family member 1                                                                                                      | 3.4                                      |
| 1454862_at                | 208177     | pleckstrin homology-like domain, family B, member 2                                                                             | 3.3                                      |
| 1436119_at                | 216188     | aldehyde dehydrogenase 1 family, member L2                                                                                      | 3.3                                      |
| 1435248_a_at              | 107182     | BTAf1 RNA polymerase II, B-TFIID transcription factor-associated, 170kDa (Mot1 homolog, S. cerevisiae)                          | 3.2                                      |
| 1437495_at                | 270669     | membrane-bound transcription factor protease, site 2                                                                            | 3.2                                      |
| 1434113_a_at              | 227656     | XPMC2 prevents mitotic catastrophe 2 homolog (Xenopus laevis)                                                                   | 3.1                                      |
| 1460369_at                | 233987     | cDNA sequence BC003267                                                                                                          | 3.1                                      |
| 1433850_at                | 232314     | protein phosphatase 4, regulatory subunit 2                                                                                     | 3.0                                      |
| 1427046_at                | 252973     | transcription factor CP2-like 3                                                                                                 | 2.9                                      |
| 1422864_at                | 12394      | runt related transcription factor 1                                                                                             | 2.9                                      |
| 1428419_at                | 71423      | RIKEN cDNA 5430411K18 gene                                                                                                      | 2.9                                      |
| 1433962_at                | 328162     | RIKEN cDNA 6720458F09 gene                                                                                                      | 2.8                                      |
| 1421065_at                | 16452      | Janus kinase 2                                                                                                                  | 2.8                                      |
| 1460370_at                | 72960      | DNA topoisomerase 1, mitochondrial                                                                                              | 2.8                                      |
| 1424866_at                | 216835     | ubiquitin specific protease 43                                                                                                  | 2.7                                      |
| 1440527_at                |            | Transcribed locus                                                                                                               | 2.7                                      |
| 1430417_s_at              | 216860     | RIKEN cDNA 0610025P10 gene                                                                                                      | 2.7                                      |
| 1452062_at                | 212627     | phosphoribosyl pyrophosphate synthetase-associated protein 2                                                                    | 2.7                                      |
| 1429650_at                | 74178      | serine/threonine kinase 40                                                                                                      | 2.6                                      |
| 1436684_a_at              | 67045      | RIO kinase 2 (yeast)                                                                                                            | 2.6                                      |
| 1437650_at                | 331006     | hypothetical protein C730026J16                                                                                                 | 2.6                                      |
| 1429491_s_at              | 51869      | Rap1 interacting factor 1 homolog (yeast)                                                                                       | 2.6                                      |
| 1428771_at                | 76788      | RIKEN cDNA 2410127E18 gene                                                                                                      | 2.5                                      |
| 1454725_at                | 101214     | RIKEN cDNA G430041M01 gene                                                                                                      | 2.5                                      |
| 1430300_at                | 52892      | SCO cytochrome oxidase deficient homolog 1 (yeast)                                                                              | 2.4                                      |
| 1418114_at                | 19664      | recombining binding protein suppressor of hairless (Drosophila)                                                                 | 2.4                                      |
| 1424507_at                | 225870     | Ras and Rab interactor 1                                                                                                        | 2.4                                      |
| 1427364_a_at              | 18263 ///  | ornithine decarboxylase, structural 1 /// similar to Ornithine decarboxylase (ODC)                                              | 2.4                                      |
|                           | 545783     |                                                                                                                                 |                                          |
| 1429778_at                | 71648      | optineurin                                                                                                                      | 2.3                                      |
| Downregulated transcripts |            |                                                                                                                                 |                                          |
| Affymetrix probe set ID   | Gene ID    | Gene description                                                                                                                | Fold change compared to uninfected mGEPs |
| 1452301_at                | 67689      | aldehyde dehydrogenase 3 family, member B1                                                                                      | -5.4                                     |
| 1460257_a_at              | 107885     | 5, 10-methenyltetrahydrofolate synthetase                                                                                       | -5.2                                     |
| 1421161_at                | 12223      | betacellulin, epidermal growth factor family member                                                                             | -4.9                                     |
| 1438475_at                |            |                                                                                                                                 | -4.9                                     |
| 1424014_at                | 67278      | RIKEN cDNA 2900092E17 gene                                                                                                      | -4.6                                     |
| 1426669_at                | 223978     | RIKEN cDNA C530044N13 gene                                                                                                      | -4.4                                     |

|              |                                                                                 |      |
|--------------|---------------------------------------------------------------------------------|------|
| 1438483_at   |                                                                                 | -4.3 |
| 1439296_at   | 18824 Proteolipid protein 2                                                     | -4.2 |
| 1450396_at   | 20843 stromal antigen 2                                                         | -4.2 |
| 1428903_at   | 73172 RIKEN cDNA 3110037I16 gene                                                | -4.2 |
| 1451560_at   | 233210 cDNA sequence BC058674                                                   | -4.0 |
| 1433639_at   | 215512 RIKEN cDNA 5730593F17 gene                                               | -3.7 |
| 1425580_a_at | 225326 phosphoinositide-3-kinase, class 3                                       | -3.7 |
| 1434787_at   | 105930 expressed sequence AI854770                                              | -3.6 |
| 1434119_at   | 227695 DNA segment, Chr 2, Wayne State University 81, expressed                 | -3.4 |
| 1416125_at   | 14229 FK506 binding protein 5                                                   | -3.3 |
| 1416897_at   | 80285 poly (ADP-ribose) polymerase family, member 9                             | -3.3 |
| 1448619_at   | 13360 7-dehydrocholesterol reductase                                            | -3.2 |
| 1423813_at   | 110033 kinesin family member 22                                                 | -3.2 |
| 1451835_at   | 223227 SRY-box containing gene 21                                               | -3.1 |
| 1435630_s_at | 110460 acetyl-Coenzyme A acetyltransferase 2                                    | -3.1 |
| 1422525_at   | 11958 ATP synthase, H+ transporting, mitochondrial F1F0 complex, subunit e      | -3.0 |
| 1425804_at   | 15372 H6 homeo box 2                                                            | -3.0 |
| 1428819_at   | 13589 microtubule-associated protein, RP/EB family, member 1                    | -3.0 |
| 1428296_at   | 66491 polymerase (RNA) II (DNA directed) polypeptide L                          | -3.0 |
| 1421824_at   | 23821 beta-site APP cleaving enzyme 1                                           | -3.0 |
| 1422653_at   | 68121 RIKEN cDNA C030018L16 gene                                                | -3.0 |
| 1448095_at   | Transcribed locus                                                               | -3.0 |
| 1455381_at   | 320675 RIKEN cDNA 4921513D23 gene                                               | -2.9 |
| 1422513_at   | 12449 cyclin F                                                                  | -2.9 |
| 1416429_a_at | 12359 catalase                                                                  | -2.9 |
| 1417403_at   | 170439 ELOVL family member 6, elongation of long chain fatty acids (yeast)      | -2.9 |
| 1448609_at   | 22117 thiosulfate sulfurtransferase, mitochondrial                              | -2.8 |
| 1438868_at   | 219132 DNA segment, Chr 14, ERATO Doi 668, expressed                            | -2.7 |
| 1434911_s_at | 71085 Rho GTPase activating protein 19                                          | -2.7 |
| 1416555_at   | 13663 etoposide induced 2.4 mRNA                                                | -2.7 |
| 1418300_a_at | 17347 MAP kinase-interacting serine/threonine kinase 2                          | -2.7 |
| 1450627_at   | 11732 progressive ankylosis                                                     | -2.7 |
| 1430640_a_at | 19088 protein kinase, cAMP dependent regulatory, type II beta                   | -2.7 |
| 1453380_a_at | 68876 RIKEN cDNA 2410012H02 gene                                                | -2.7 |
| 1426146_a_at | 212862 choline phosphotransferase 1                                             | -2.6 |
| 1449125_at   | 66443 tumor necrosis factor, alpha-induced protein 8-like 1                     | -2.6 |
| 1448943_at   | 18186 neuropilin 1                                                              | -2.6 |
| 1451209_at   | 71949 longevity assurance homolog 5 (S. cerevisiae)                             | -2.5 |
| 1428451_at   | 72946 leucine rich repeat containing 47                                         | -2.5 |
| 1419976_s_at | 18021 nuclear factor of activated T-cells, cytoplasmic, calcineurin-dependent 3 | -2.4 |
