# Supplementary material
Source: PubMed Central journal article supplement (PMC2393758)
Supplement: pnas_0800668105_17.pdf [file pnas_0800668105_17.pdf]

**Table 12. Canonical signaling and metabolic pathways enriched among the differentially expressed progenitor-specific mGEP transcripts after infection with Kx1 or Kx2.**

| <b>Top seven statistically significant canonical signaling and metabolic pathways enriched among differentially expressed mGEP transcripts after infection with Kx1.</b> |                |                                             |                                                                  |
|--------------------------------------------------------------------------------------------------------------------------------------------------------------------------|----------------|---------------------------------------------|------------------------------------------------------------------|
| <b>Canonical Pathway</b>                                                                                                                                                 | <b>p-value</b> | <b>Gene symbols</b>                         | <b>Affymetrix probe set ID's</b>                                 |
| PPAR Signaling                                                                                                                                                           | 9.21E-03*      | Map3k14, Ikbke, Cited2, Map3k7ip1, Ppargc1a | 1434364_at, 1417813_at, 1421267_a_at, 1426898_at, 1434100_x_at   |
| TGF-β Signaling                                                                                                                                                          | 3.3E-02*       | Pias4, Smad7, Tgfb2, Map3k7ip1              | 1418861_at, 1423389_at, 1450922_a_at, 1426898_at                 |
| N-Glycan Biosynthesis                                                                                                                                                    | 3.45E-02*      | Fut8, Alg12, Mgat2                          | 1460319_at, 1424818_at, 1426350_at                               |
| p38 MAPK Signaling                                                                                                                                                       | 3.66E-02*      | Tgfb2, Eef2k, Map3k5, Map3k7ip1             | 1450922_a_at, 1437829_s_at, 1421340_at, 1426898_at               |
| Lysine Degradation                                                                                                                                                       | 7.78E-02*      | Aldh2, Dot1l                                | 1434987_at, 1457268_at                                           |
| Ephrin Receptor Signaling                                                                                                                                                | 8.42E-02*      | Rgs3, Cfl2, Map4k4, Efnb3, Epha2            | 1425296_a_at, 1418066_at, 1448050_s_at, 1423085_at, 1421151_a_at |
| Death Receptor Signaling                                                                                                                                                 | 8.92E-02*      | Map3k14, Ikbke, Map3k5                      | 1434364_at, 1417813_at, 1421340_at                               |
| <b>Top seven statistically significant canonical signaling and metabolic pathways enriched among differentially expressed mGEP transcripts after infection with Kx2.</b> |                |                                             |                                                                  |
| <b>Canonical Pathway</b>                                                                                                                                                 | <b>p-value</b> | <b>Gene symbols</b>                         | <b>Affymetrix probe set ID's</b>                                 |
| Xenobiotic Metabolism Signaling                                                                                                                                          | 1.7E-02*       | Abcb1, Aldh1l2, Cyp3a7, Cat, Aldh3b1        | 1419758_at, 1436119_at, 1419523_at, 1416429_a_at, 1452301_at     |
| Amyloid Processing                                                                                                                                                       | 3.11E-02*      | Prkar2b, Bace1                              | 1430640_a_at, 1421824_at                                         |
| Tryptophan Metabolism                                                                                                                                                    | 5.21E-02*      | Acat2, Cyp3a7, Cat                          | 1435630_s_at, 1419523_at, 1416429_a_at                           |
| Aminophosphonate Metabolism                                                                                                                                              | 5.31E-02*      | Chpt1                                       | 1426146_a_at                                                     |
| GM-CSF Signaling                                                                                                                                                         | 5.87E-02*      | Runx1, Jak2                                 | 1422864_at, 1421065_at                                           |
| Synthesis and Degradation of Ketone Bodies                                                                                                                               | 6.78E-02*      | Acat2                                       | 1435630_s_at                                                     |
| Arginine and Proline Metabolism                                                                                                                                          | 8.96E-02*      | Nos1, Odc1                                  | 1438483_at, 1427364_a_at                                         |

\* indicates a p-value <0.1 in a right-tailed Fisher's Exact Test. Red indicates up-regulated genes upon infection and green indicates down-regulated transcripts. For fold changes see Tables 10 and 11.
