# Supplementary material
Source: PubMed Central journal article supplement (PMC2393758)
Supplement: pnas_0800668105_18.pdf [file pnas_0800668105_18.pdf]

Table 13. Transcripts that are significantly changed in the ChAG-associated Kx1 isolate after mGEP infection.

| HPAG1 homolog | 26695 homolog | J99 homolog | Annotation                                                       | Gene symbol | COG*/NOG** number | COG category | EC† number | Fold change compared to non-infecting Kx1 |
|---------------|---------------|-------------|------------------------------------------------------------------|-------------|-------------------|--------------|------------|-------------------------------------------|
| HPAG1_0001    | HP0001        | JHP0001     | N utilization substance protein B                                | nusB        | COG0781           | K            |            | -2.8                                      |
| HPAG1_0045    | HP0049        | JHP0042     | hypothetical protein                                             |             | COG2957           | E            |            | 3.1                                       |
| HPAG1_0054    | HP0057        | JHP0049     | hypothetical protein                                             |             |                   |              |            | 4.1                                       |
| HPAG1_0114    | HP0114        | JHP0106     | hypothetical protein                                             |             | COG2604           | S            |            | 2.8                                       |
| HPAG1_0121    | HP0122        | JHP0112     | hypothetical protein                                             |             |                   |              |            | 2.5                                       |
| HPAG1_0158    | HP0160        | JHP0148     | cysteine-rich protein D                                          | hcpD        | COG0790           | R            |            | 3.7                                       |
| HPAG1_0188    | HP0194        | JHP0180     | triosephosphate isomerase                                        | tpi         | COG0149           | G            | 5.3.1.1    | 3.3                                       |
| HPAG1_0209    | HP0208        | JHP0194     | lipopolysaccharide 1,2-glycosyltransferase                       | rfaj2       | COG1442           | M            |            | 3.7                                       |
| HPAG1_0212    | HP0211        | JHP0197     | cysteine-rich protein A                                          | hcpA        | COG0790           | R            |            | 7.5                                       |
| HPAG1_0220    | HP0218        | JHP0204     | phospholipid-binding protein                                     |             | COG1881           | R            |            | 3.5                                       |
| HPAG1_0238    | HP0235        | JHP0220     | cysteine-rich protein E                                          | hcpE        | COG0790           | R            |            | 2.8                                       |
| HPAG1_0296    | HP0294        | JHP0279     | aliphatic amidase                                                | amiE        | COG0388           | R            | 3.5.1.4    | 3.4                                       |
| HPAG1_0303    | HP0301        | JHP0286     | dipeptide ABC transporter                                        | dppD        | COG0444           | E            | 2.7.2.3    | -2.4                                      |
| HPAG1_0305    | HP0303        | JHP0288     | GTP-binding protein                                              |             | COG0536           | R            |            | -2.9                                      |
| HPAG1_0314    |               |             | DNA methylase                                                    |             | COG0863           | L            | 2.1.1.-    | 2.8                                       |
| HPAG1_0495    | HP0520        | JHP0469     | caq pathogenicity island protein 1                               | caq1        |                   |              |            | 2.4                                       |
| HPAG1_0496    | HP0521B       |             | HP0521B protein                                                  | caq2        |                   |              |            | 3.0                                       |
| HPAG1_0509    | HP0533        |             | hypothetical protein                                             |             |                   |              |            | 4.2                                       |
| HPAG1_0511    | HP0535        | JHP0483     | caq pathogenicity island protein Q                               | caqQ        |                   |              |            | 2.5                                       |
| HPAG1_0568    | HP0588        | JHP0536     | 2-oxooglutarate oxidoreductase OorD subunit                      | oorD        | COG1146           | C            | 1.2.7.3    | -6.0                                      |
| HPAG1_0570    | HP0590        | JHP0538     | 2-oxooglutarate oxidoreductase OorB subunit                      | oorB        | COG1013           | C            | 1.2.7.3    | -3.0                                      |
| HPAG1_0571    | HP0591        | JHP0539     | 2-oxooglutarate oxidoreductase OorC subunit                      | oorC        | COG1014           | C            | 1.2.7.3    | -3.6                                      |
| HPAG1_0574    | HP0594        | JHP0541     | hypothetical protein                                             |             |                   |              |            | 3.7                                       |
| HPAG1_0603    | HP0620        | JHP0564     | inorganic pyrophosphatase                                        | ppa         | COG0221           | C            | 3.6.1.1    | -3.5                                      |
| HPAG1_0621    | HP0638        | JHP0581     | outer membrane protein HopH                                      | hopH        |                   |              |            | 2.5                                       |
| HPAG1_0626    | HP0642        | JHP0586     | NAD(P)H-flavin oxidoreductase                                    | frxA        | COG0778           | C            |            | -2.7                                      |
| HPAG1_0637    | HP0652        | JHP0597     | phosphoserine phosphatase                                        | serB        | COG0560           | F            | 3.1.3.3    | 4.1                                       |
| HPAG1_0662    | HP0680        | JHP0621     | ribonucleoside-diphosphate reductase 1 alpha subunit             | nrdA        | COG0209           | F            | 1.17.4.1   | -2.5                                      |
| HPAG1_0682    | HP0697        | JHP0631     | acetone carboxylase, gamma subunit                               |             | COG4647           | Q            |            | -2.5                                      |
| HPAG1_0743    | HP0758        | JHP0695     | conserved hypothetical integral membrane protein                 |             | COG2056           | R            |            | -2.4                                      |
| HPAG1_0796    | HP0811        | JHP0747     | hypothetical protein                                             |             | NOG40717          |              |            | 2.8                                       |
| HPAG1_0859    | HP0876        | JHP0810     | iron-regulated outer membrane protein                            | frpB        | COG1629           | P            |            | 6.1                                       |
| HPAG1_0889    | HP0907        | JHP0843     | hook assembly protein, flagella                                  | fliD        | COG1843           | N            |            | 3.6                                       |
| HPAG1_0930    | HP0946        | JHP0880     | conserved hypothetical integral membrane protein                 |             | COG1757           | C            |            | 2.5                                       |
| HPAG1_0986    | HP0406        | JHP0975     | hypothetical protein                                             |             | NOG13219          |              |            | -2.7                                      |
| HPAG1_0987    | HP0405        | JHP0976     | nifS-like protein                                                |             | COG0520           | E            | 4.4.1.16   | -2.8                                      |
| HPAG1_0989    | HP0403        | JHP0978     | phenylalaninyl-tRNA synthetase, alpha subunit                    | pheS        | COG0016           | J            | 6.1.1.20   | -2.7                                      |
| HPAG1_0992    | HP0400        | JHP0981     | isoprenyl pyrophosphate and dimethylallyl diphosphate synthetase | lvtB        | COG0761           | I            | 1.17.1.2   | -2.9                                      |
| HPAG1_1004    | HP0388        | JHP0993     | hypothetical protein                                             |             | COG0500           | Q            | 2.1.1.-    | -3.7                                      |
| HPAG1_1017    | HP0375        | JHP1006     | hypothetical protein                                             |             | NOG44864          |              |            | 3.4                                       |
| HPAG1_1027    | HP0367        | JHP1014     | hypothetical protein                                             |             |                   |              |            | 2.2                                       |
| HPAG1_1028    | HP0366        | JHP1015     | spore coat polysaccharide biosynthesis protein C                 |             | COG0399           | M            | 2.6.1.50   | 4.6                                       |
| HPAG1_1033    | HP0360        | JHP1020     | UDP-glucose 4-epimerase                                          | qaIE        | COG1087           | M            | 5.1.3.2    | 4.5                                       |
| HPAG1_1081    | HP1143        | JHP1071     | hypothetical protein                                             |             | COG4487           | S            |            | 3.2                                       |
| HPAG1_1084    | HP1145        | JHP1073     | hypothetical protein                                             |             | COG1432           | S            |            | 2.6                                       |
| HPAG1_1094    | HP1155        | JHP1082     | UDP-N-acetylglucosamine lipid transferase                        | murG        | COG0707           | M            | 2.4.1.227  | 3.5                                       |
| HPAG1_1125    | HP1185        | JHP1111     | sugar efflux transporter protein                                 | sotB        | COG2814           | G            |            | 2.3                                       |
| HPAG1_1155    | HP1214        | JHP1137     | hypothetical protein                                             |             | COG1926           | R            | 2.4.2.-    | 3.3                                       |
| HPAG1_1158    | HP1218        | JHP1140     | glycinamide ribonucleotide synthetase                            | purD        | COG0151           | F            | 6.3.4.13   | 3.3                                       |
| HPAG1_1248    | HP1303        | JHP1223     | ribosomal protein L18                                            | rpl18       | COG0256           | J            |            | -2.3                                      |
| HPAG1_1253    | HP1308        | JHP1228     | ribosomal protein L24                                            | rpl24       | COG0198           | J            |            | -2.5                                      |
| HPAG1_1254    | HP1309        | JHP1229     | ribosomal protein L14                                            | rpl14       | COG0093           | J            |            | -2.9                                      |
| HPAG1_1261    | HP1316        | JHP1236     | ribosomal protein L2                                             | rpl2        | COG0090           | J            |            | -3.8                                      |
| HPAG1_1271    | HP1326        | JHP1246     | hypothetical protein                                             |             |                   |              |            | -2.2                                      |
| HPAG1_1323    | HP1377        | JHP1291     | hypothetical protein                                             |             | COG1699           | S            |            | -2.7                                      |
| HPAG1_1353    | HP1428        | JHP1325     | hypothetical protein                                             |             | COG0820           | R            |            | -2.5                                      |
| HPAG1_1354    | HP1429        | JHP1324     | polysialic acid capsule expression protein                       | kpsF        | COG0517/COG0794   | R/M          | 5.3.1.13   | -5.0                                      |
| HPAG1_1357    | HP1432        | JHP1321     | histidine and glutamine-rich metal binding protein               |             |                   |              |            | 3.6                                       |
| HPAG1_1411    | HP1501        | JHP1394     | outer membrane protein HopK                                      | hopK        |                   |              |            | 2.6                                       |
| HPAG1_1472    | HP1398        | JHP1428     | alanine dehydrogenase                                            | ald         | COG0686           | E            | 1.4.1.1    | -2.3                                      |
| HPAG1_1534    |               |             | hypothetical protein                                             |             |                   |              |            | 5.5                                       |

\*Cluster of Orthologous Groups

\*\*Non-supervised Orthologous Group

†Enzyme Commission
