# Supplementary material
Source: PubMed Central journal article supplement (PMC2393758)
Supplement: pnas_0800668105_19.pdf [file pnas_0800668105_19.pdf]

**Table 14. Transcripts that are significantly changed in the ChAG-associated Kx1 isolate but not in the cancer-associated Kx2 isolate after mGEP infection.**

| HPAG1 homolog | 26695 homolog | J99 homolog | Annotation                                         | Gene symbol | COG*/NOG**<br>number | COG category | EC† number | Fold change in KX1<br>upon mGEP infection | Fold change in KX2<br>upon mGEP infection |
|---------------|---------------|-------------|----------------------------------------------------|-------------|----------------------|--------------|------------|-------------------------------------------|-------------------------------------------|
| HPAG1_0054    | HP0057        | JHP0049     | hypothetical protein                               |             |                      |              |            | 4.1                                       | -2.8                                      |
| HPAG1_0114    | HP0114        | JHP0106     | hypothetical protein                               |             | COG2604              | S            |            | 2.8                                       | -1.2                                      |
| HPAG1_0209    | HP0208        | JHP0194     | lipopolysaccharide 1,2-glycosyltransferase         | rfaJ2       | COG1442              | M            |            | 3.7                                       | -1.0                                      |
| HPAG1_0212    | HP0211        | JHP0197     | cysteine-rich protein A                            | hcpA        | COG0790              | R            |            | 7.5                                       | 2.0                                       |
| HPAG1_0296    | HP0294        | JHP0279     | aliphatic amidase                                  | amiE        | COG0388              | R            | 3.5.1.4    | 3.4                                       | -2.0                                      |
| HPAG1_0303    | HP0301        | JHP0286     | dipeptide ABC transporter                          | dppD        | COG0444              | E            | 2.7.2.3    | -2.4                                      | -1.1                                      |
| HPAG1_0305    | HP0303        | JHP0288     | GTP-binding protein                                | obg         | COG0536              | R            |            | -2.9                                      | -1.1                                      |
| HPAG1_0682    | HP0697        | JHP0631     | acetone carboxylase, gamma subunit                 |             | COG4647              | Q            |            | -2.5                                      | 1.1                                       |
| HPAG1_0743    | HP0758        | JHP0695     | conserved hypothetical integral membrane protein   |             | COG2056              | R            |            | -2.4                                      | 1.4                                       |
| HPAG1_0930    | HP0946        | JHP0880     | conserved hypothetical integral membrane protein   |             | COG1757              | C            |            | 2.5                                       | 1.1                                       |
| HPAG1_0986    | HP0406        | JHP0975     | hypothetical protein                               |             | NOG13219             |              |            | -2.7                                      | -1.2                                      |
| HPAG1_0987    | HP0405        | JHP0976     | nifS-like protein                                  |             | COG0520              | E            | 4.4.1.16   | -2.8                                      | 1.4                                       |
| HPAG1_1027    | HP0367        | JHP1014     | hypothetical protein                               |             |                      |              |            | 2.2                                       | -3.9                                      |
| HPAG1_1028    | HP0366        | JHP1015     | spore coat polysaccharide biosynthesis protein C   |             | COG0399              | M            | 2.6.1.50   | 4.6                                       | -3.0                                      |
| HPAG1_1081    | HP1143        | JHP1071     | hypothetical protein                               |             | COG4487              | S            |            | 3.2                                       | -1.1                                      |
| HPAG1_1094    | HP1155        | JHP1082     | UDP-N-acetylglucosamine lipid transferase          | murG        | COG0707              | M            | 2.4.1.227  | 3.5                                       | -2.8                                      |
| HPAG1_1357    | HP1432        | JHP1321     | histidine and glutamine-rich metal binding protein |             |                      |              |            | 3.6                                       | -1.2                                      |

\*Cluster of Orthologous Groups

\*\*Non-supervised Orthologous Group

†Enzyme Commission
