# Supplementary material
Source: PubMed Central journal article supplement (PMC2393758)
Supplement: pnas_0800668105_20.pdf [file pnas_0800668105_20.pdf]

Table 15. Transcripts that are significantly changed in the cancer-associated Kx2 isolate after mGEP infection.

| HPAG1 homolog | 26695 homolog | J99 homolog | Annotation                                                      | Gene symbol | COG*/NOG** number | COG category | EC† number | Fold change compared to non-infecting Kx2 |
|---------------|---------------|-------------|-----------------------------------------------------------------|-------------|-------------------|--------------|------------|-------------------------------------------|
| HPAG1_0009    | HP0009        | JHP0007     | outer membrane protein HopZ                                     | hopZ        |                   |              |            | -4.2                                      |
| HPAG1_0016    | HP0016        | JHP0014     | hypothetical protein                                            |             |                   |              |            | 4.2                                       |
| HPAG1_0037    | HP0038        | JHP0034     | comb8 competence protein                                        | comb8       | COG3736           | U            |            | 4.8                                       |
| HPAG1_0054    | HP0057        | JHP0049     | hypothetical protein                                            |             |                   |              |            | -2.8                                      |
| HPAG1_0084    | HP0083        | JHP0076     | ribosomal protein S9                                            | rps9        | COG0103           | J            |            | -4.2                                      |
| HPAG1_0085    | HP0084        | JHP0077     | ribosomal protein L13                                           | rpl13       | COG0102           | J            |            | -3.2                                      |
| HPAG1_0099    | HP0099        | JHP0091     | methyl-accepting chemotaxis transmembrane sensory protein       | tipA        | COG0940           | N            |            | -4.6                                      |
| HPAG1_0111    | HP0111        | JHP0103     | heat-inducible transcription repressor                          | hrcA        | COG1420           | K            |            | 2.5                                       |
| HPAG1_0121    | HP0122        | JHP0112     | hypothetical protein                                            |             |                   |              |            | 2.4                                       |
| HPAG1_0129    | HP0130        | JHP0119     | hypothetical protein                                            |             |                   |              |            | 2.2                                       |
| HPAG1_0149    | HP0151        | JHP0139     | conserved hypothetical membrane protein                         |             |                   |              |            | 2.7                                       |
| HPAG1_0167    | HP0171        | JHP0157     | peptide chain release factor RF-2                               | prfB        | COG1186           | J            | 3.1.1.29   | 2.4                                       |
| HPAG1_0178    | HP0181        | JHP0169     | hypothetical protein                                            |             | COG1286           | R            |            | -3.3                                      |
| HPAG1_0198    | HP0204        | JHP0190     | hypothetical protein                                            |             |                   |              |            | -6.0                                      |
| HPAG1_0210    | HP0209        | JHP0195     | outer membrane protein HofA                                     | hofA        |                   |              |            | 3.0                                       |
| HPAG1_0245    | HP0242        | JHP0227     | hypothetical protein                                            |             | NOG46103          |              |            | -3.7                                      |
| HPAG1_0250    | HP0247        | JHP0232     | ATP-dependent RNA helicase                                      | deaD        | COG0513           | L            | 2.7.7.-    | -2.6                                      |
| HPAG1_0274    | HP0272        | JHP0257     | hypothetical protein                                            |             | NOG45155          |              |            | 2.6                                       |
| HPAG1_0282    | HP0280        | JHP0265     | putative lipid A biosynthesis acyltransferase                   | ibpB        | COG1560           | M            | 2.3.1.-    | -3.4                                      |
| HPAG1_0297    | HP0295        | JHP0280     | putative flagellar-hook associated protein 3                    | fla         | COG1344           | N            |            | -2.7                                      |
| HPAG1_0298    | HP0296        | JHP0291     | ribosomal protein L21                                           | rpl21       | COG3261           | J            |            | -3.1                                      |
| HPAG1_0334    | HP0330        | JHP0313     | ketol-acid reductoisomerase                                     | ivcC        | COG0059           | E            | 1.1.1.86   | 2.7                                       |
| HPAG1_0386    | HP1061        | JHP0364     | sec-independent protein translocase protein                     | tatC        | COG0805           | U            |            | 2.6                                       |
| HPAG1_0397    | HP1050        | JHP0375     | homoserine kinase                                               | thrB        | COG0083           | E            | 2.7.1.39   | 2.8                                       |
| HPAG1_0398    | HP1049        | JHP0376     | hypothetical protein                                            |             | COG2740           | K            |            | 3.1                                       |
| HPAG1_0422    | HP1025        | JHP0399     | putative heat shock protein                                     | hspR        | COG0789           | K            |            | 2.9                                       |
| HPAG1_0428    | HP1019        | JHP0405     | protease DO                                                     | htrA        | COG0265           | O            | 3.4.21.-   | -2.6                                      |
| HPAG1_0448    |               |             | hypothetical protein                                            |             |                   |              |            | 7.3                                       |
| HPAG1_0495    | HP0520        | JHP0469     | cag pathogenicity island protein 1                              | cag1        |                   |              |            | 2.3                                       |
| HPAG1_0510    | HP0534        | JHP0482     | cag pathogenicity island protein S                              | cagS        |                   |              |            | 3.3                                       |
| HPAG1_0513    | HP0538        | JHP0486     | cag pathogenicity island protein N                              | cagN        |                   |              |            | 2.6                                       |
| HPAG1_0532    | HP0554        | JHP0501     | hypothetical protein                                            |             | NOG39968          |              |            | 2.7                                       |
| HPAG1_0534    | HP0556        | JHP0503     | hypothetical protein                                            |             |                   |              |            | 3.9                                       |
| HPAG1_0536    | HP0558        | JHP0505     | beta ketoacyl-acyl carrier protein synthase II                  | fabF        | COG0304           | I            | 2.3.1.41   | 2.2                                       |
| HPAG1_0544    | HP0565        | JHP0512     | hypothetical protein                                            |             | COG3059           | S            |            | -3.4                                      |
| HPAG1_0553    | HP0574        | JHP0521     | ribose 5-phosphate isomerase                                    | rpi         | COG0898           | G            | 5.3.1.6    | -2.4                                      |
| HPAG1_0561    | HP0582        | JHP0529     | putative siderophore-mediated iron transport protein            | tonB1       | COG0810           | M            |            | -3.4                                      |
| HPAG1_0568    | HP0588        | JHP0536     | 2-oxoglutarate oxidoreductase OorD subunit                      | oorD        | COG1146           | C            | 1.2.7.3    | -4.6                                      |
| HPAG1_0569    | HP0589        | JHP0537     | 2-oxoglutarate oxidoreductase OorA subunit                      | oorA        | COG0674           | C            | 1.2.7.3    | -6.3                                      |
| HPAG1_0603    | HP0620        | JHP0564     | inorganic pyrophosphatase                                       | ppa         | COG0221           | C            | 3.6.1.1    | -2.8                                      |
| HPAG1_0626    | HP0642        | JHP0586     | NAD(P)H-flavin oxidoreductase                                   | fxA         | COG0778           | C            |            | -4.2                                      |
| HPAG1_0632    | HP0647        | JHP0592     | hypothetical protein                                            |             | NOG46051          |              |            | -2.5                                      |
| HPAG1_0633    | HP0648        | JHP0593     | UDP-N-acetylglucosamine enolpyruvyl transferase                 | murZ        | COG0766           | M            | 2.5.1.7    | -6.0                                      |
| HPAG1_0649    | HP0664        | JHP0609     | hypothetical protein                                            |             | NOG47101          |              |            | -2.4                                      |
| HPAG1_0670    | HP0687        | JHP0627     | iron(II) transport protein                                      | feoB        | COG0370           | P            |            | 3.9                                       |
| HPAG1_0671    | HP0688        | JHP0628     | hypothetical protein                                            |             | COG3298           | L            |            | 2.1                                       |
| HPAG1_0679    | HP0694        | JHP0634     | putative outer membrane protein                                 |             | COG3528           | S            |            | 2.8                                       |
| HPAG1_0696    | HP0711        | JHP0650     | hypothetical protein                                            |             | COG1896/COG4940   | RU           |            | 4.4                                       |
| HPAG1_0698    | HP0713        | JHP0651     | hypothetical protein                                            |             | COG3177           | S            |            | 2.8                                       |
| HPAG1_0711    | HP0727        | JHP0664     | transcriptional regulator                                       |             | COG0042           | J            | 1.-.-.-    | 2.4                                       |
| HPAG1_0719    | HP0735        | JHP0672     | xanthine guanine phosphoribosyl transferase                     | gpt         | COG2236           | R            | 2.4.2.22   | -3.1                                      |
| HPAG1_0720    | HP0736        | JHP0673     | phosphoserine aminotransferase                                  | serC        | COG0075           | E            | 2.6.1.-    | -2.9                                      |
| HPAG1_0734    | HP0749        | JHP0686     | cell division membrane protein                                  | ftsX        | NOG12526          |              |            | 2.6                                       |
| HPAG1_0739    | HP0754        | JHP0691     | hypothetical protein                                            |             |                   |              |            | 3.4                                       |
| HPAG1_0790    | HP0805        | JHP0741     | lipooligosaccharide 5G8 epitope biosynthesis-associated protein | lex2B       | COG3306           | M            |            | 5.3                                       |
| HPAG1_0820    | HP0834        | JHP0773     | GTP-binding protein homologue                                   | yphC        | COG1160           | R            | 1.1.1.95   | 2.3                                       |
| HPAG1_0826    | HP0841        | JHP0779     | pantothenate metabolism flavoprotein                            | dfp         | COG0452           | H            | 4.1.1.36   | -2.5                                      |
| HPAG1_0874    | HP0895        |             | hypothetical protein                                            |             |                   |              |            | -2.7                                      |
| HPAG1_0888    | HP0906        | JHP0842     | hypothetical protein                                            |             | NOG43410          |              |            | -3.2                                      |
| HPAG1_0897    | HP0914        | JHP0850     | outer membrane protein HopG                                     | hopG        |                   |              |            | 3.2                                       |
| HPAG1_0966    |               |             | hypothetical protein                                            |             |                   |              |            | 3.8                                       |
| HPAG1_0979    | HP0415        | JHP0969     | conserved hypothetical integral membrane protein                |             | COG0668           | M            |            | 3.2                                       |
| HPAG1_0987    | HP0395        | JHP0986     | hypothetical protein                                            |             | COG0325           | R            | 2.7.3.-    | -4.0                                      |
| HPAG1_1003    | HP0389        | JHP0992     | iron-dependent superoxide dismutase                             | sodB        | COG0605           | P            | 1.15.1.1   | -2.4                                      |
| HPAG1_1004    | HP0388        | JHP0993     | hypothetical protein                                            |             | COG0500           | Q            | 2.1.1.-    | -3.1                                      |
| HPAG1_1010    | HP0382        | JHP0999     | zinc-metalloprotease                                            |             | COG0501           | O            | 3.4.24.-   | -2.7                                      |
| HPAG1_1017    | HP0375        | JHP1006     | hypothetical protein                                            |             | NOG44864          |              |            | 3.9                                       |
| HPAG1_1025    | HP0368        | JHP1013     | hypothetical protein                                            |             |                   |              |            | 2.4                                       |
| HPAG1_1027    | HP0367        | JHP1014     | hypothetical protein                                            |             |                   |              |            | -3.9                                      |
| HPAG1_1076    | HP1138        | JHP1066     | plasmid replication-partition related protein                   |             | COG1475           | K            |            | 2.7                                       |
| HPAG1_1093    | HP1154        | JHP1081     | hypothetical protein                                            |             | COG1699           | S            |            | -2.4                                      |
| HPAG1_1094    | HP1155        | JHP1082     | UDP-N-acetylglucosamine lipid transferase                       | murG        | COG0707           | M            | 2.4.1.227  | -2.8                                      |
| HPAG1_1104    | HP1165        | JHP1092     | tetracycline resistance protein tetA(P)                         |             | COG0477           | G            |            | 3.4                                       |
| HPAG1_1112    | HP1173        | JHP1100     | hypothetical protein                                            |             |                   |              |            | -2.9                                      |
| HPAG1_1113    | HP1174        | JHP1101     | glucose/galactose transporter                                   | gluP        | COG0738           | G            |            | 3.1                                       |
| HPAG1_1119    | HP1180        | JHP1106     | pyrimidine nucleoside transport protein                         | nupC        | COG1972           | F            |            | 3.8                                       |
| HPAG1_1151    | HP1209        |             | iceA1                                                           | iceA1       | NOG47905          |              | 3.1.21.4   | 3.1                                       |
| HPAG1_1157    | HP1217        | JHP1139     | hypothetical protein                                            |             | COG1714           | S            |            | 4.5                                       |
| HPAG1_1169    | HP1227        | JHP1148     | hypothetical protein                                            |             | COG2863           | C            |            | -3.3                                      |
| HPAG1_1175    | HP1233        | JHP1154     | hypothetical protein                                            |             | NOG41927          |              |            | -3.3                                      |
| HPAG1_1193    | HP1250        | JHP1171     | hypothetical protein                                            |             |                   |              |            | 4.9                                       |
| HPAG1_1217    | HP1273        | JHP1194     | NADH-ubiquinone oxidoreductase chain N                          | nuoN        | COG1007           | C            | 1.6.5.3    | -3.0                                      |
| HPAG1_1220    |               | JHP1197     | hypothetical protein                                            |             |                   |              |            | -4.7                                      |
| HPAG1_1222    | HP1291        | JHP1211     | hypothetical protein                                            |             | COG1564           | H            | 2.7.6.2    | 5.8                                       |
| HPAG1_1227    | HP1286        | JHP1206     | conserved hypothetical secreted protein                         |             | COG2353           | S            |            | -5.9                                      |
| HPAG1_1269    | HP1324        | JHP1244     | hypothetical protein                                            |             |                   |              |            | -2.6                                      |
| HPAG1_1270    | HP1325        | JHP1245     | fumarase                                                        | fumC        | COG0114           | C            | 4.2.1.2    | -3.0                                      |
| HPAG1_1271    | HP1326        | JHP1246     | hypothetical protein                                            |             |                   |              |            | -7.6                                      |
| HPAG1_1284    | HP1327        | JHP1256     | nicotinate-nucleotide adenyltransferase                         | nadD        | COG1057           | H            | 2.7.7.18   | -3.5                                      |
| HPAG1_1325    | HP1379        | JHP1293     | ATP-dependent protease                                          | lon         | COG0466           | O            | 3.4.21.53  | -2.5                                      |
| HPAG1_1326    | HP1380        | JHP1294     | prephenate dehydrogenase                                        | trpA        | COG0287           | E            | 1.3.1.12   | -2.9                                      |
| HPAG1_1366    | HP1440        | JHP1333     | hypothetical protein                                            |             | NOG39578          |              |            | 2.8                                       |
| HPAG1_1370    | HP1444        | JHP1337     | SsrA-binding protein                                            | sspB        | COG0891           | O            |            | 2.5                                       |
| HPAG1_1385    | HP1531        | JHP1419     | hypothetical protein                                            |             | NOG40348          |              |            | -3.6                                      |
| HPAG1_1388    | HP1527        | JHP1416     | periplasmic competence protein                                  | comH        |                   |              |            | -2.3                                      |
| HPAG1_1391    | HP1524        | JHP1413     | hypothetical protein                                            |             |                   |              |            | -6.0                                      |
| HPAG1_1400    | HP1512        | JHP1405     | iron-regulated outer membrane protein                           | frpB        | COG1629           | P            |            | 4.2                                       |
| HPAG1_1425    | HP1488        | JHP1381     | conserved hypothetical secreted protein                         |             | COG0845           | M            |            | -2.4                                      |
| HPAG1_1483    | HP1385        | JHP1440     | fructose-1,6-bisphosphatase                                     | fbp         | COG0158           | G            | 3.1.3.11   | -2.7                                      |
| HPAG1_1523    | HP1574        | JHP1482     | riboflavin synthase alpha subunit                               | ribC        | COG0307           | H            | 2.5.1.9    | 3.1                                       |
| HPAG1_1534    |               |             | hypothetical protein                                            |             |                   |              |            | 6.1                                       |

\*Cluster of Orthologous Groups

\*\*Non-supervised Orthologous Group

†Enzyme Commission
