# Supplementary material
Source: PubMed Central journal article supplement (PMC2393758)
Supplement: pnas_0800668105_21.pdf [file pnas_0800668105_21.pdf]

Table 16. Transcripts that are significantly changed in the cancer-associated Kx2 isolate but not in the ChAG-associated Kx1 isolate after mGEP infection.

| HPAG1 homolog | 26695 homolog | J99 homolog | Annotation                                                      | Gene symbol | COG*/NOG** | COG category | EC† number | Fold change in KX2 upon mGEP infection | Fold change in KX1 upon mGEP infection |
|---------------|---------------|-------------|-----------------------------------------------------------------|-------------|------------|--------------|------------|----------------------------------------|----------------------------------------|
| HPAG1_0009    | HP0009        | JHP0007     | outer membrane protein HopZ                                     | hopZ        |            |              |            | -4.2                                   | -1.0                                   |
| HPAG1_0016    | HP0016        | JHP0014     | hypothetical protein                                            |             |            |              |            | 4.2                                    | 1.1                                    |
| HPAG1_0037    | HP0038        | JHP0034     | comB8 competence protein                                        | comB8       | COG3736    | U            |            | 4.8                                    | -1.2                                   |
| HPAG1_0054    | HP0057        | JHP0049     | hypothetical protein                                            |             |            |              |            | -2.8                                   | 4.1                                    |
| HPAG1_0111    | HP0111        | JHP0103     | heat-inducible transcription repressor                          | hrcA        | COG1420    | K            |            | 2.5                                    | -1.8                                   |
| HPAG1_0210    | HP0209        | JHP0195     | outer membrane protein HofA                                     | hofA        |            |              |            | 3.0                                    | -1.6                                   |
| HPAG1_0282    | HP0280        | JHP0265     | putative lipid A biosynthesis acyltransferase                   | lfbpB       | COG1560    | M            | 2.3.1.-    | -3.4                                   | -1.1                                   |
| HPAG1_0297    | HP0295        | JHP0280     | putative flagellar-hook associated protein 3                    | fla         | COG1344    | N            |            | -2.7                                   | 1.4                                    |
| HPAG1_0334    | HP0330        | JHP0313     | ketol-acid reductoisomerase                                     | livC        | COG0059    | E            | 1.1.1.86   | 2.7                                    | -1.0                                   |
| HPAG1_0386    | HP1061        | JHP0364     | sec-independent protein translocase protein                     | latC        | COG0805    | U            |            | 2.6                                    | 1.1                                    |
| HPAG1_0397    | HP1050        | JHP0375     | homoserine kinase                                               | thrB        | COG0083    | E            | 2.7.1.39   | 2.8                                    | -1.1                                   |
| HPAG1_0398    | HP1049        | JHP0376     | hypothetical protein                                            |             | COG2740    | K            |            | 3.1                                    | 1.1                                    |
| HPAG1_0422    | HP1025        | JHP0399     | putative heat shock protein                                     | hspR        | COG0789    | K            |            | 2.9                                    | 1.1                                    |
| HPAG1_0534    | HP0556        | JHP0503     | hypothetical protein                                            |             |            |              |            | 3.9                                    | -1.0                                   |
| HPAG1_0544    | HP0565        | JHP0512     | hypothetical protein                                            |             | COG3059    | S            |            | -3.4                                   | 1.0                                    |
| HPAG1_0553    | HP0574        | JHP0521     | ribose 5-phosphate isomerase                                    | rpi         | COG0698    | G            | 5.3.1.6    | -2.4                                   | -1.0                                   |
| HPAG1_0632    | HP0647        | JHP0592     | hypothetical protein                                            |             | NOG46051   |              |            | -2.5                                   | 1.8                                    |
| HPAG1_0679    | HP0694        | JHP0634     | putative outer membrane protein                                 |             | COG3528    | S            |            | 2.8                                    | 1.1                                    |
| HPAG1_0739    | HP0754        | JHP0691     | hypothetical protein                                            |             |            |              |            | 3.4                                    | -1.1                                   |
| HPAG1_0790    | HP0805        | JHP0741     | lipooligosaccharide 5G8 epitope biosynthesis-associated protein | lex2B       | COG3306    | M            |            | 5.3                                    | -1.3                                   |
| HPAG1_0874    | HP0895        | JHP0895     | hypothetical protein                                            |             |            |              |            | -2.7                                   | -1.1                                   |
| HPAG1_0888    | HP0906        | JHP0842     | hypothetical protein                                            |             | NOG43410   |              |            | -3.2                                   | 1.9                                    |
| HPAG1_0897    | HP0914        | JHP0850     | outer membrane protein HopG                                     | hopG        |            |              |            | 3.2                                    | 1.2                                    |
| HPAG1_0979    | HP0415        | JHP0969     | conserved hypothetical integral membrane protein                |             | COG0668    | M            |            | 3.2                                    | 1.1                                    |
| HPAG1_1025    |               |             | hypothetical protein                                            |             |            |              |            | 2.4                                    | 1.2                                    |
| HPAG1_1027    | HP0367        | JHP1014     | hypothetical protein                                            |             |            |              |            | -3.9                                   | 2.2                                    |
| HPAG1_1093    | HP1154        | JHP1081     | hypothetical protein                                            |             | COG1699    | S            |            | -2.4                                   | 2.2                                    |
| HPAG1_1094    | HP1155        | JHP1082     | UDP-N-acetylglucosamine lipid transferase                       | murG        | COG0707    | M            | 2.4.1.227  | -2.8                                   | 3.5                                    |
| HPAG1_1104    | HP1165        | JHP1092     | tetracycline resistance protein tetA(P)                         |             | COG0477    | G            |            | 3.4                                    | -1.0                                   |
| HPAG1_1113    | HP1174        | JHP1101     | glucose/galactose transporter                                   | gluP        | COG0738    | G            |            | 3.1                                    | -1.4                                   |
| HPAG1_1151    | HP1209        |             | iceA1                                                           | iceA1       | NOG47905   |              | 3.1.21.4   | 3.1                                    | 1.3                                    |
| HPAG1_1175    | HP1233        | JHP1154     | hypothetical protein                                            |             | NOG41927   |              |            | -3.3                                   | 1.1                                    |
| HPAG1_1193    | HP1250        | JHP1171     | hypothetical protein                                            |             |            |              |            | 4.9                                    | 1.1                                    |
| HPAG1_1220    |               | JHP1197     | hypothetical protein                                            |             |            |              |            | -4.7                                   | 1.2                                    |
| HPAG1_1227    | HP1286        | JHP1206     | conserved hypothetical secreted protein                         |             | COG2353    | S            |            | -5.9                                   | -2.3                                   |
| HPAG1_1269    | HP1324        | JHP1244     | hypothetical protein                                            |             |            |              |            | -2.6                                   | 1.1                                    |
| HPAG1_1270    | HP1325        | JHP1245     | fumerase                                                        | fumC        | COG0114    | C            | 4.2.1.2    | -3.0                                   | -1.0                                   |
| HPAG1_1284    | HP1337        | JHP1256     | nicotinate-nucleotide adenyltransferase                         | nadD        | COG1057    | H            | 2.7.7.18   | -3.5                                   | -1.0                                   |
| HPAG1_1326    | HP1380        | JHP1294     | perphenate dehydrogenase                                        | tyrA        | COG0287    | E            | 1.3.1.12   | -2.9                                   | -1.2                                   |
| HPAG1_1366    | HP1440        | JHP1333     | hypothetical protein                                            |             | NOG39578   |              |            | 2.8                                    | -1.6                                   |
| HPAG1_1385    | HP1531        | JHP1419     | hypothetical protein                                            |             | NOG40348   |              |            | -3.6                                   | 2.6                                    |
| HPAG1_1388    | HP1527        | JHP1416     | periplasmic competence protein                                  | comH        |            |              |            | -2.3                                   | -1.0                                   |
| HPAG1_1425    | HP1488        | JHP1381     | conserved hypothetical secreted protein                         |             | COG0845    | M            |            | -2.4                                   | 1.8                                    |
| HPAG1_1483    | HP1385        | JHP1440     | fructose-1,6-bisphosphatase                                     | fbp         | COG0158    | G            | 3.1.3.11   | -2.7                                   | 1.1                                    |

\*Cluster of Orthologous Groups

\*\*Non-supervised Orthologous Group

†Enzyme Commission
